# Supplementary material for: Molecular mechanism of a large conformational change of the quinone cofactor in the semiquinone intermediate of bacterial copper amine oxidase
Source: Royal Society of Chemistry journal article supplement (doi:10.1039/d2sc01356h), 2022-01-01
Supplement: d2sc01356h1.pdf [file d2sc01356h1.pdf]

## Supplementary Information

### **Molecular mechanism of a large conformational change of the quinone cofactor in the semiquinone intermediate of bacterial copper amine oxidase**

Mitsuo Shoji,\* Takeshi Murakawa, Shota Nakanishi, Mauro Boero, Yasuteru Shigeta,  
Hideyuki Hayashi, Toshihide Okajima

\*Corresponding author: Mitsuo Shoji, [mshoji@ccs.tsukuba.ac.jp](mailto:mshoji@ccs.tsukuba.ac.jp)

## Table of Contents

### Experimental Details

#### Enzyme Preparation

#### Measurement of Rate of TPQ biogenesis

#### Analysis of Transient Kinetics of Catalytic Reaction

**Table S1.** Statistics of data collection and crystallographic refinement.

**Table S2.** Most relevant atomic distances between heavy atoms in the simulated structures.

**Table S3.** Comparison of the QM region in our simulations with respect to the X-ray crystal structures in TPQ<sub>amr</sub> and TPQ<sub>sq</sub>.

**Table S4.** Comparison of the QM region in our simulations with respect to the X-ray crystal structures in the oxidized form.

**Figure S1.** SDS-PAGE analysis of AGAO.

**Figure S2.** Variations in the UV/vis spectra during TPQ biogenesis of the N381A mutant and the WT of AGAO.

**Figure S3.** Transient spectral changes during the reductive half-reaction of the N381A mutant and the WT of AGAO with 2-PEA.

**Figure S4.** UV/vis absorption spectra of the N381A crystals: N381A<sub>holo</sub> and N381A<sub>holo/PEA</sub>.

**Figure S5.** Structure of the cofactor in the N381A mutant of AGAO.

**Figure S6.** Structure of the active site of the of the TPQ<sub>amr</sub> intermediate of the N381A mutant formed by reaction with 2-PEA.

**Figure S7.** Amino acid residues surrounding the TPQ<sub>amr</sub> (TPQ382).

**Figure S8.** Steric hindrance acting during the TPQ conformational changes.

**Figure S9.** Molecular structures of the transition states.

**Figure S10.** Superimposed structures realized upon the deprotonation of O4H-TPQ: **1/1h**, **2/2h** and **3/3h**.

**Figure S11.** Active-site structure of the copper amine oxidase in *Pisum sativum*.

## References

Atomic coordinates of the QM region in the intermediate and transition states are provided in a standard XYZ format and in Å units.

## Experimental Details

### Enzyme Preparation.

Site-specific mutagenesis of Asn381 into Ala was obtained by using a QuikChange Site-Directed Mutagenesis Kit (STRATAGENE) following the manufacturer's instructions with the pairs of mutually complementary primers (sense strand: N381A(+), 5'-CTTCACCACTATCGGCGCCTACGACTACGGCTTC-3'; antisense strand: N381A(-); 5'-GAAGCCGTAGTCGTAGGCGCCGATAGTGGTGAAG-3') containing mismatching bases (underlined) for the mutated codons and a plasmid pEPO-02 [S1] encoding the WT enzyme as a template.

The WT and the N381A mutant of AGAO were expressed in *Escherichia coli* CD03 in a Cu-depleted medium and purified to homogeneity in the Cu<sup>2+</sup>/TPQ-less apo form described in Ref. [S2]. The Cu<sup>2+</sup>- and TPQ-containing holo form was prepared as reported in Ref. [S3]. In the present study, the TPQ biogenesis in the N381A mutant was done by aerobic incubation for a considerably longer time (3 weeks at 4 °C) than that of the WT (about 15 h at 4 °C). The protein concentrations were spectrophotometrically determined using extinction coefficients at 280 nm of 12.3 and 13.2 for the 1% (w/v) solutions of the apo and holo forms, respectively [S2] and expressed as molar concentrations of the subunit, unless otherwise stated.

### Measurement of Rate of TPQ Biogenesis.

The rate of the TPQ biogenesis was spectrophotometrically determined in the reaction mixture containing the 0.1 mM apo AGAO subunit (WT and N381A mutant) and 0.25 mM CuSO<sub>4</sub> in 50 mM HEPES buffer at pH 6.8. The reaction was done at 30 °C under atmospheric conditions, and the absorption spectra in the wavelength region 300–700 nm were recorded every 30 s using an Agilent 8453 photodiode-array spectrophotometer (Agilent Technologies, Inc.). The observed rate constants ( $k_{\text{obs}}$ ) for the TPQ biogenesis were calculated by fitting the time-depended absorbance changes at 480 nm or 495 nm for the WT and N381A enzymes, respectively, to single exponential curves using IGOR Pro (Wave Metrics, Inc.).

### Analysis of Transient Kinetics of Catalytic Reaction.

Transient changes of the absorption spectra of AGAO during the reductive half-reaction are monitored at 15 °C using a stopped-flow spectrometer (Applied Photophysics, Ltd.) with all lines and reservoir cylinders maintained under fully anaerobic conditions. Typically, equal volumes (about 30  $\mu$ L each) of the enzyme solution (0.18 mM subunit of the WT or N381A mutant AGAO in 50 mM HEPES buffer, pH 6.8) and substrate solution (8 mM 2-PEA) were mixed in a mixing cell (volume, 20  $\mu$ L) triggered with an N<sub>2</sub>-gas piston; the mixing dead time was 2.3 ms at the N<sub>2</sub>-gas pressure of 500 kPa. The UV/visible absorption spectra were recorded every 2.56 ms over the wavelength range of 250–800 nm. To avoid spectral changes induced by the oxidative half-reaction,

both the enzyme and the substrate solutions were kept in an anaerobic SGV-65V glove box (AS ONE corporation) filled with 99.999% Ar gas for at least 12 h before the stopped-flow measurements.

**Table S1.** Statistics of data collection and crystallographic refinement

| Proteins<br>(PDB code)                     | N381A <sub>holo</sub><br>(7WIR)            | N381A <sub>holo/PEA</sub><br>(7WIS) |
|--------------------------------------------|--------------------------------------------|-------------------------------------|
| data collection                            |                                            |                                     |
| wavelength (Å)                             | 0.90                                       | 0.90                                |
| space group                                | C2                                         | C2                                  |
| unit cell dimensions                       |                                            |                                     |
| <i>a, b, c</i> (Å)                         | 192.97, 63.02, 153.01                      | 191.93, 63.47, 185.10               |
| <i>β</i> (deg)                             | 117.63                                     | 117.30                              |
| no. of observations                        | 964630                                     | 492849                              |
| no. of unique reflections                  | 265999                                     | 130556                              |
| resolution range (Å)                       | 22.45 – 1.50<br>(1.58 – 1.50) <sup>a</sup> | 26.56 – 1.90<br>(2.00 – 1.90)       |
| multiplicity                               | 3.6 (3.5)                                  | 3.8 (3.7)                           |
| completeness (%)                           | 99.0 (97.1)                                | 98.0 (97.1)                         |
| <i>R</i> <sub>merge</sub> (%) <sup>b</sup> | 9.1 (47.3)                                 | 12.9 (46.1)                         |
| refinement statistics                      |                                            |                                     |
| resolution range (Å)                       | 22.45 – 1.50                               | 26.36 – 1.90                        |
| no. of solvent atoms                       | 1540                                       | 1231                                |
| rms deviation from ideal values            |                                            |                                     |
| bond length (Å)                            | 0.012                                      | 0.007                               |
| bond angles (deg)                          | 1.504                                      | 1.105                               |
| <i>R</i> factor (%) <sup>c</sup>           | 16.10                                      | 16.26                               |
| <i>R</i> <sub>free</sub> (%) <sup>d</sup>  | 18.10                                      | 19.67                               |
| Ramachandran plot                          |                                            |                                     |
| favoured/allowed/outlier (%)               | 96.7/2.9/0.4                               | 95.8/4.0/0.2                        |

<sup>a</sup>The numbers in parentheses indicate the value for the highest resolution shell. <sup>b</sup> $R_{\text{merge}} = \frac{\sum hkl \sum_i |I_i(hkl) - \langle I(hkl) \rangle|}{\sum hkl \sum_i I_i(hkl)}$ , where  $I_i(hkl)$  is an individual intensity measurement, and  $\langle I(hkl) \rangle$  is the average intensity for this reflection. <sup>c</sup> $R = \frac{\sum ||F_o| - |F_c||}{\sum |F_o|}$ . <sup>d</sup> $R_{\text{free}}$  is an *R* factor of the refinement evaluated for 5% of reflections that were excluded from the refinement.

**Table S2.** Most relevant atomic distances between heavy atoms in the simulated structures.

| State                                        | Atom 1                | Atom 2                | Distance / Å            |
|----------------------------------------------|-----------------------|-----------------------|-------------------------|
| <b>1h</b>                                    | O $\delta$ 1-Asp298   | N5-TPQ <sub>amr</sub> | 3.33                    |
|                                              | O $\eta$ -Tyr284      | O4-TPQ <sub>amr</sub> | 2.67 (HB <sup>a</sup> ) |
|                                              | O-Wat <sub>ax</sub>   | O2-TPQ <sub>amr</sub> | 2.92 (HB)               |
| <b>1h<sup>NA</sup></b>                       | O $\delta$ 1-Asp298   | N5-TPQ <sub>amr</sub> | 3.20 (HB)               |
|                                              | O $\eta$ -Tyr284      | O4-TPQ <sub>amr</sub> | 2.67 (HB)               |
|                                              | O-Wat <sub>ax</sub>   | O2-TPQ <sub>amr</sub> | 3.02 (HB)               |
| <b>TS (1h, 2h)</b>                           | O $\delta$ -Asn381    | N5-TPQ <sub>amr</sub> | 2.71 (HB)               |
|                                              | N $\delta$ -Asn381    | N5-TPQ <sub>amr</sub> | 2.75 (HB)               |
|                                              | O $\eta$ -Tyr384      | O $\delta$ 1-Asp298   | 3.07 (HB)               |
|                                              | O $\eta$ -Tyr284      | O4-TPQ <sub>amr</sub> | 2.68 (HB)               |
|                                              | O2-TPQ <sub>amr</sub> | O $\eta$ -Tyr384      | 2.67                    |
| <b>TS (1h<sup>NA</sup>, 2h<sup>NA</sup>)</b> | N5-TPQ <sub>amr</sub> | C $\beta$ -Ala381     | 3.75                    |
|                                              | O $\eta$ -Tyr384      | O $\delta$ 1-Asp298   | 2.96 (HB)               |
|                                              | O $\eta$ -Tyr284      | O4-TPQ <sub>amr</sub> | 2.66 (HB)               |
|                                              | O2-TPQ <sub>amr</sub> | O $\eta$ -Tyr384      | 2.67                    |
| <b>2h</b>                                    | O-Wat <sub>ax</sub>   | N5-TPQ <sub>amr</sub> | 3.32                    |
|                                              | O $\eta$ -Tyr284      | O4-TPQ <sub>amr</sub> | 2.63 (HB)               |
|                                              | O $\eta$ -Tyr284      | N5-TPQ <sub>amr</sub> | 3.17 (HB)               |
|                                              | N5-TPQ <sub>amr</sub> | N $\delta$ -Asn381    | 2.88 (HB)               |
| <b>2h<sup>NA</sup></b>                       | O-Wat <sub>ax</sub>   | N5-TPQ <sub>amr</sub> | 3.14                    |
|                                              | O $\eta$ -Tyr284      | O4-TPQ <sub>amr</sub> | 2.60 (HB)               |
|                                              | N5-TPQ <sub>amr</sub> | C $\beta$ -Ala381     | 3.94                    |
| <b>TS (2h, 3h)</b>                           | O $\eta$ -Tyr284      | N5-TPQ <sub>amr</sub> | 2.60                    |
|                                              | O $\eta$ -Tyr284      | O4-TPQ <sub>amr</sub> | 3.31                    |
|                                              | N $\delta$ -Asn381    | N5-TPQ <sub>amr</sub> | 3.06 (HB)               |
| <b>TS (2h<sup>NA</sup>, 3h<sup>NA</sup>)</b> | O $\eta$ -Tyr284      | N5-TPQ <sub>amr</sub> | 2.67                    |
|                                              | O $\eta$ -Tyr284      | O4-TPQ <sub>amr</sub> | 3.69                    |
|                                              | C $\beta$ -Ala381     | N5-TPQ <sub>amr</sub> | 4.95                    |
| <b>3h</b>                                    | O $\delta$ 1-Asp298   | O4-TPQ <sub>amr</sub> | 2.91 (HB)               |
|                                              | O $\eta$ -Tyr284      | N5-TPQ <sub>amr</sub> | 2.88 (HB)               |
|                                              | O $\delta$ -Asn381    | N5-TPQ <sub>amr</sub> | 3.70                    |
| <b>3h<sup>NA</sup></b>                       | O $\eta$ -Tyr284      | N5-TPQ <sub>amr</sub> | 2.84 (HB)               |
|                                              | O $\delta$ 1-Asp298   | O4-TPQ <sub>amr</sub> | 2.91 (HB)               |
| <b>1</b>                                     | O $\delta$ 1-Asp298   | N5-TPQ <sub>sq</sub>  | 3.59                    |
|                                              | O $\eta$ -Tyr284      | O4-TPQ <sub>sq</sub>  | 2.60 (HB)               |
| <b>1<sup>NA</sup></b>                        | O $\delta$ 1-Asp298   | N5-TPQ <sub>sq</sub>  | 3.49                    |

|                                            |                      |                      |           |
|--------------------------------------------|----------------------|----------------------|-----------|
|                                            | Oδ2-Asp298           | Oη-Tyr384            | 3.25 (HB) |
|                                            | Oη-Tyr284            | O4-TPQ <sub>sq</sub> | 2.61 (HB) |
| <b>TS (1, 2)</b>                           | Oδ1-Asp298           | O2-TPQ <sub>sq</sub> | 3.47      |
|                                            | Oδ2-Asp298           | Oη-Tyr384            | 2.95 (HB) |
|                                            | Oη-Tyr284            | O4-TPQ <sub>sq</sub> | 2.70 (HB) |
|                                            | Oδ-Asn381            | N5-TPQ <sub>sq</sub> | 2.82 (HB) |
|                                            | Nδ-Asn381            | N5-TPQ <sub>sq</sub> | 2.96 (HB) |
| <b>TS (1<sup>NA</sup>, 2<sup>NA</sup>)</b> | Oδ1-Asp298           | O2-TPQ <sub>sq</sub> | 4.93      |
|                                            | Oδ2-Asp298           | Oη-Tyr384            | 2.98 (HB) |
|                                            | Oη-Tyr284            | O4-TPQ <sub>sq</sub> | 2.66 (HB) |
|                                            | O2-TPQ <sub>sq</sub> | Oη-Tyr384            | 2.55      |
|                                            | Cβ-Ala381            | N5-TPQ <sub>sq</sub> | 4.08      |
| <b>2</b>                                   | N5-TPQ <sub>sq</sub> | Nδ-Asn381            | 3.10      |
|                                            | Oη-Tyr384            | Oδ2-Asp298           | 3.14 (HB) |
|                                            | Oη-Tyr284            | O4-TPQ <sub>sq</sub> | 2.57 (HB) |
|                                            | Oδ1-Asp298           | O2-TPQ <sub>sq</sub> | 3.38      |
|                                            | Oη-Tyr384            | N5-TPQ <sub>sq</sub> | 3.30      |
| <b>2<sup>NA</sup></b>                      | Oη-Tyr284            | O4-TPQ <sub>sq</sub> | 2.57 (HB) |
|                                            | Oδ1-Asp298           | O2-TPQ <sub>sq</sub> | 3.40      |
|                                            | Oδ2-Asp298           | Oη-Tyr384            | 3.16 (HB) |
|                                            | Cβ-Ala381            | N5-TPQ <sub>sq</sub> | 4.69      |
|                                            | N5-TPQ <sub>sq</sub> | Oη-Tyr384            | 3.29      |
| <b>3</b>                                   | Oδ-Asn381            | N5-TPQ <sub>sq</sub> | 3.63      |
|                                            | Oη-Tyr284            | N5-TPQ <sub>sq</sub> | 3.00 (HB) |
|                                            | Oδ1-Asp298           | O4-TPQ <sub>sq</sub> | 2.73 (HB) |
|                                            | Oδ2-Asp298           | Oη-Tyr384            | 3.10 (HB) |
| <b>3<sup>NA</sup></b>                      | Oδ1-Asp298           | O4-TPQ <sub>sq</sub> | 2.74 (HB) |
|                                            | Oδ2-Asp298           | Oη-Tyr384            | 2.98 (HB) |
|                                            | Oη-Tyr284            | N5-TPQ <sub>sq</sub> | 2.97 (HB) |
| <b>4</b>                                   | Oδ2-Asp298           | Oη-Tyr384            | 3.22 (HB) |
|                                            | Oδ1-Asp298           | O2-TPQ <sub>sq</sub> | 4.16      |
|                                            | Oη-Tyr284            | O4-TPQ <sub>sq</sub> | 2.50 (HB) |
|                                            | O-Wat1               | N5-TPQ <sub>sq</sub> | 2.96 (HB) |
| <b>4<sup>NA</sup></b>                      | Oη-Tyr284            | O4-TPQ <sub>sq</sub> | 2.50 (HB) |
|                                            | Oδ1-Asp298           | O2-TPQ <sub>sq</sub> | 3.97      |
|                                            | Oδ2-Asp298           | Oη-Tyr384            | 3.21 (HB) |
|                                            | Cβ-Ala381            | O2-TPQ <sub>sq</sub> | 5.81      |
|                                            | N5-TPQ <sub>sq</sub> | O-Wat1               | 2.92 (HB) |



|                                            |                      |                      |                         |
|--------------------------------------------|----------------------|----------------------|-------------------------|
|                                            | N5-TPQ <sub>sq</sub> | Cu                   | 3.29                    |
| <b>TS (4, 5)</b>                           | Oη-Tyr284            | O2-TPQ <sub>sq</sub> | 5.18                    |
|                                            | Oη-Tyr284            | O4-TPQ <sub>sq</sub> | 2.73                    |
|                                            | Oδ1-Asp298           | O2-TPQ <sub>sq</sub> | 4.39                    |
|                                            | Oδ-Asn381            | O2-TPQ <sub>sq</sub> | 3.15 (HB)               |
|                                            | Oη-Tyr284            | O-Wat1               | 3.29 (HB)               |
|                                            | O2-TPQ <sub>sq</sub> | O-Wat1               | 2.68 (HB)               |
|                                            | O4-TPQ <sub>sq</sub> | Cu                   | 3.79                    |
| <b>TS (4<sup>NA</sup>, 5<sup>NA</sup>)</b> | Oη-Tyr284            | O4-TPQ <sub>sq</sub> | 2.71                    |
|                                            | Oδ1-Asp298           | O2-TPQ <sub>sq</sub> | 4.18                    |
|                                            | Cβ-Ala381            | O2-TPQ <sub>sq</sub> | 5.64                    |
|                                            | Oη-Tyr284            | O-Wat1               | 3.22 (HB)               |
|                                            | O2-TPQ <sub>sq</sub> | O-Wat1               | 2.71 (HB)               |
|                                            | O4-TPQ <sub>sq</sub> | Cu                   | 3.94                    |
| <b>5</b>                                   | Oδ1-Asp298           | O2-TPQ <sub>sq</sub> | 6.00                    |
|                                            | Oδ2-Asp298           | Oη-Tyr384            | 3.11 (HB)               |
|                                            | Oδ-Asn381            | O2-TPQ <sub>sq</sub> | 2.96                    |
|                                            | Nδ-Asn381            | O2-TPQ <sub>sq</sub> | 3.04 (HB)               |
|                                            | Oη-Tyr284            | O-Wat1               | 2.75 (HB)               |
|                                            | O2-TPQ <sub>sq</sub> | O-Wat1               | 2.88 (HB)               |
|                                            | O4-TPQ <sub>sq</sub> | Cu                   | 2.27 (CD <sup>b</sup> ) |
| <b>5<sup>NA</sup></b>                      | Oδ1-Asp298           | O2-TPQ <sub>sq</sub> | 6.43                    |
|                                            | Oδ2-Asp298           | Oη-Tyr384            | 2.99 (HB)               |
|                                            | Cβ-Ala381            | O2-TPQ <sub>sq</sub> | 4.13                    |
|                                            | Oη-Tyr284            | O-Wat1               | 2.75 (HB)               |
|                                            | O2-TPQ <sub>sq</sub> | O-Wat1               | 2.84 (HB)               |
|                                            | O4-TPQ <sub>sq</sub> | Cu                   | 2.33 (CD)               |
| <b>TS (1, 6)</b>                           | Oδ1-Asp298           | N5-TPQ <sub>sq</sub> | 5.39                    |
|                                            | Oη-Tyr284            | O4-TPQ <sub>sq</sub> | 2.48 (HB)               |
|                                            | Oη-Tyr284            | N5-TPQ <sub>sq</sub> | 3.82                    |
| <b>6</b>                                   | Oη-Tyr284            | O4-TPQ <sub>sq</sub> | 2.52 (HB)               |
|                                            | Oη-Tyr284            | N5-TPQ <sub>sq</sub> | 2.82 (HB)               |
|                                            | Oδ1-Asp298           | N5-TPQ <sub>sq</sub> | 6.32                    |
|                                            | Oδ2-Asp298           | Oη-Tyr384            | 3.29 (HB)               |
|                                            | Oδ-Asn381            | N5-TPQ <sub>sq</sub> | 3.26 (HB)               |
|                                            | Nδ-Asn381            | N5-TPQ <sub>sq</sub> | 3.47                    |
|                                            | O4-TPQ <sub>sq</sub> | Cu                   | 4.07                    |
| <b>TS (6, 5)</b>                           | Oδ1-Asp298           | Oη-Tyr384            | 3.05 (HB)               |

|                                                 |                       |                      |           |
|-------------------------------------------------|-----------------------|----------------------|-----------|
|                                                 | O2-TPQ382             | O $\eta$ -Tyr384     | 2.57      |
|                                                 | C $\epsilon$ 1-His433 | C3-Tyr384            | 3.12      |
|                                                 | O $\eta$ -Tyr284      | O4-TPQ <sub>sq</sub> | 3.70      |
|                                                 | O4-TPQ <sub>sq</sub>  | Cu                   | 2.62      |
| <b>TS (6, 7)</b>                                | O $\eta$ -Tyr284      | O4-TPQ <sub>sq</sub> | 3.26 (HB) |
|                                                 | O $\eta$ -Tyr284      | N5-TPQ <sub>sq</sub> | 2.52 (HB) |
|                                                 | O $\delta$ 2-Asp298   | O $\eta$ -Tyr384     | 3.32      |
|                                                 | N $\delta$ -Asn381    | N5-TPQ <sub>sq</sub> | 2.88 (HB) |
|                                                 | O4-TPQ <sub>sq</sub>  | Cu                   | 3.16      |
| <b>7</b>                                        | O $\eta$ -Tyr284      | N5-TPQ <sub>sq</sub> | 3.63      |
|                                                 | O $\delta$ 2-Asp298   | O-Tyr384             | 2.94 (HB) |
|                                                 | N $\delta$ -Asn381    | N5-TPQ <sub>sq</sub> | 3.43      |
|                                                 | O4-TPQ <sub>sq</sub>  | Cu                   | 2.12 (CD) |
| <b>OX</b>                                       | O $\eta$ -Tyr284      | O4-TPQ <sub>ox</sub> | 2.55 (HB) |
|                                                 | O-Wat <sub>ax</sub>   | O2-TPQ <sub>ox</sub> | 2.89      |
|                                                 | O $\delta$ 1-Asp298   | O5-TPQ <sub>ox</sub> | 3.35      |
| <b>TS (OX, OXrot)</b>                           | O $\eta$ -Tyr284      | O4-TPQ <sub>ox</sub> | 2.50 (HB) |
|                                                 | O $\delta$ -Asn381    | O5-TPQ <sub>ox</sub> | 2.78      |
|                                                 | N $\delta$ -Asn381    | O5-TPQ <sub>ox</sub> | 2.83 (HB) |
|                                                 | O $\eta$ -Tyr384      | O2-TPQ <sub>ox</sub> | 2.51 (HB) |
| <b>OXrot</b>                                    | O $\eta$ -Tyr284      | O4-TPQ <sub>ox</sub> | 2.55 (HB) |
|                                                 | O-Wat <sub>ax</sub>   | O5-TPQ <sub>ox</sub> | 2.63 (HB) |
|                                                 | O $\delta$ 1-Asp298   | O2-TPQ <sub>ox</sub> | 3.43      |
| <b>OX<sup>NA</sup></b>                          | O $\eta$ -Tyr284      | O4-TPQ <sub>ox</sub> | 2.55 (HB) |
|                                                 | O-Wat <sub>ax</sub>   | O2-TPQ <sub>ox</sub> | 2.94 (HB) |
|                                                 | O $\delta$ 1-Asp298   | O5-TPQ <sub>ox</sub> | 3.34      |
| <b>TS (OX<sup>NA</sup>, OXrot<sup>NA</sup>)</b> | O $\eta$ -Tyr284      | O4-TPQ <sub>ox</sub> | 2.52 (HB) |
|                                                 | O $\eta$ -Tyr384      | O2-TPQ <sub>ox</sub> | 2.47 (HB) |
|                                                 | C $\beta$ -Ala381     | O5-TPQ <sub>ox</sub> | 3.77      |
| <b>OXrot<sup>NA</sup></b>                       | O $\eta$ -Tyr284      | O4-TPQ <sub>ox</sub> | 2.53 (HB) |
|                                                 | O-Wat <sub>ax</sub>   | O5-TPQ <sub>ox</sub> | 2.62 (HB) |
|                                                 | O $\delta$ 1-Asp298   | O2-TPQ <sub>ox</sub> | 3.43      |

<sup>a</sup>A distance is attributed to a hydrogen bond whenever it is shorter than 3.3 Å and labeled as HB.

<sup>b</sup>Coordination bonds are indicated as CD.

**Table S3.** Comparison of the QM region for the models used in our simulations with respect to the corresponding region in the X-ray crystal structures of the catalytic intermediates during the reductive half-reaction. Root-Mean-Square deviation (RMSD) values are reported for the atoms in the QM subsystem.<sup>a</sup>

|                        | RMSD (Å)                                 |                                  |                                         |
|------------------------|------------------------------------------|----------------------------------|-----------------------------------------|
|                        | WT, TPQ <sub>amr</sub><br>(PDB ID: 3X3Z) | N381A holo/PEA<br>(PDB ID: 7WIS) | WT, TPQ <sub>sq</sub><br>(PDB ID: 3X3X) |
| <b>1h</b>              | 0.291                                    | 1.070                            | 1.701                                   |
| <b>3h</b>              | 1.108                                    | 0.376                            | 1.879                                   |
| <b>1</b>               | 0.317                                    | 1.069                            | 1.683                                   |
| <b>3</b>               | 1.104                                    | 0.364                            | 1.897                                   |
| <b>5</b>               | 1.803                                    | 1.947                            | 0.516                                   |
| <b>1h<sup>NA</sup></b> | 0.287                                    | 1.076                            | 1.706                                   |
| <b>3h<sup>NA</sup></b> | 1.110                                    | 0.392                            | 1.869                                   |
| <b>5<sup>NA</sup></b>  | 1.817                                    | 1.968                            | 0.567                                   |

<sup>a</sup>Fifty heavy atoms (non-hydrogen atoms) excluding the water oxygen atoms and carboxamide side chain of Asn381 (C<sub>γ</sub>N<sub>δ</sub>C<sub>δ</sub>O) are used for the RMSD calculation.

**Table S4.** Comparison of the QM region for the models used in our simulations with respect to the corresponding region in the X-ray crystal structures of the oxidized form. Root-Mean-Square deviation (RMSD) values are reported for the atoms in the QM region.<sup>a</sup>

|                                      | RMSD (Å)                                |                                                  |                                                  |
|--------------------------------------|-----------------------------------------|--------------------------------------------------|--------------------------------------------------|
|                                      | WT, Neutron structure<br>(PDB ID: 6L9C) | N381A <sub>holo</sub> /Conf. a<br>(PDB ID: 7WIR) | N381A <sub>holo</sub> /Conf. b<br>(PDB ID: 7WIR) |
| <b>OX</b>                            | 0.327                                   | 0.574                                            | 1.295                                            |
| <b>OX<sub>rot</sub></b>              | 1.244                                   | 1.334                                            | 0.614                                            |
| <b>OX<sup>NA</sup></b>               | 0.332                                   | 0.577                                            | 1.297                                            |
| <b>OX<sub>rot</sub><sup>NA</sup></b> | 1.239                                   | 1.328                                            | 0.610                                            |

<sup>a</sup>Fifty heavy atoms (non-hydrogen atoms) excluding the water oxygen atoms and carboxamide side chain of Asn381 (C<sub>γ</sub>N<sub>δ</sub>C<sub>δ</sub>O) are used for the RMSD calculation.

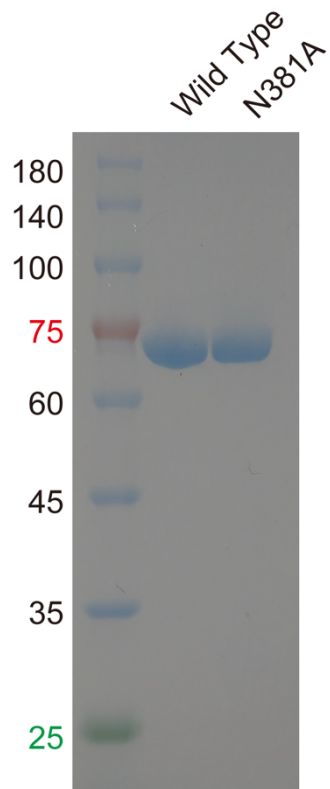

**Figure S1.** SDS-PAGE analysis of AGAO. Lane 1: molecular weight markers (kDa); Lanes 2 and 3: purified proteins (5  $\mu$ g each) of wild-type (lane 2) and N381A mutant (lane 3) of AGAO.

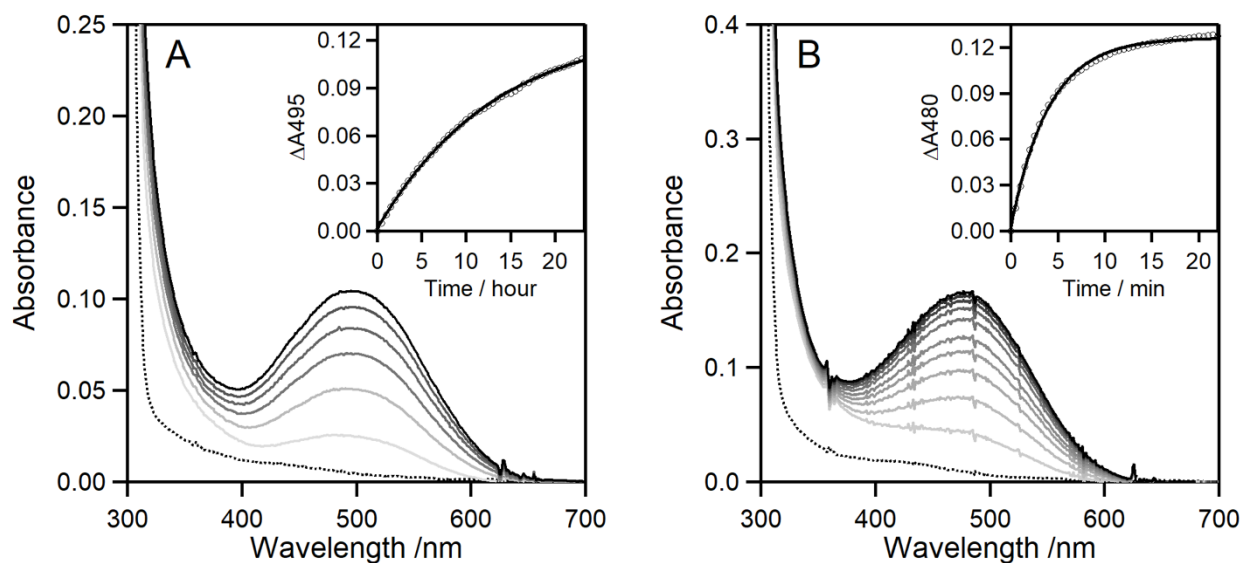

**Figure S2.** Spectral changes during the TPQ biogenesis of (A) the N381A mutant and (B) the WT AGAO. The UV/vis absorption spectra were recorded after mixing the enzyme (0.1 mM subunit) with 0.25 mM  $\text{Cu}^{2+}$  ion in 50 mM HEPES buffer, at a pH of 6.8 and a temperature of 30 °C under aerobic conditions. The shown spectra are the ones obtained at (A) 4, 8, 12, 16, 20, and 24 h, and (B) 1, 2, 3, 4, 5, 7, 9, 11, and 15 min. Darker curves indicate later times. The dashed line represents the initial spectrum of the enzyme (apo form). Insets: open-circle marks indicate the absorbance changes at 495 (A) and 480 (B) nm as a function of time. The theoretical line is obtained by single-exponential kinetics.

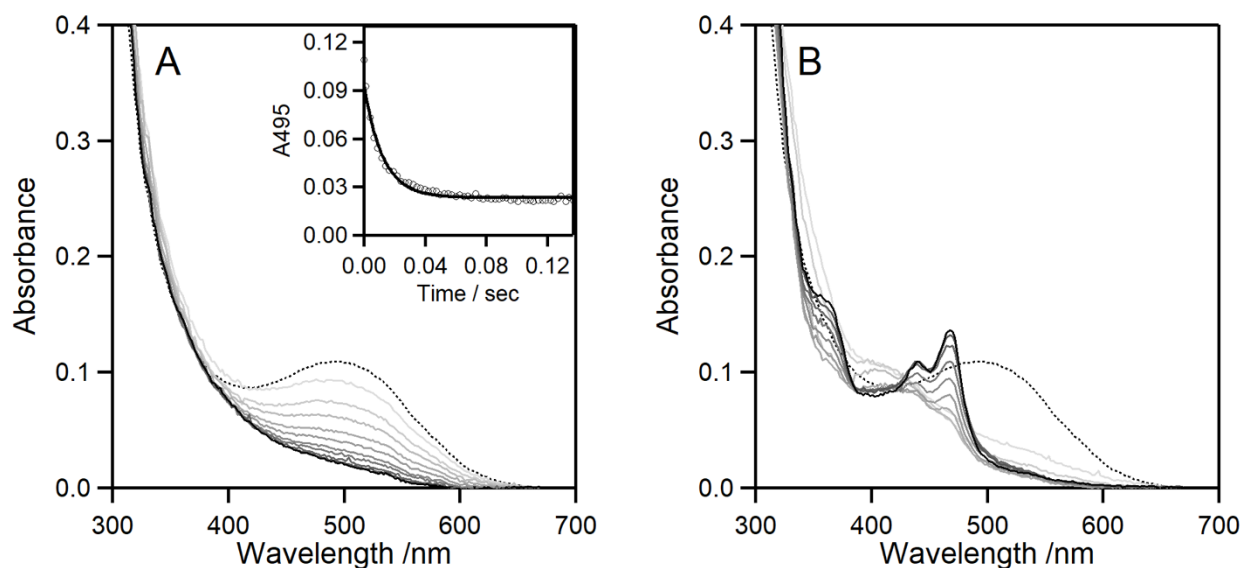

**Figure S3.** Transient spectral changes during the reductive half-reaction of (A) the N381A mutant and (B) the WT AGAO with 2-PEA. The UV/vis absorption spectra were recorded after mixing the enzyme (0.09 mM subunit) with 4 mM substrate in 50 mM HEPES buffer, at a pH of 6.8 and a temperature of 15 °C under anaerobic conditions. The shown spectra are obtained at 2.3, 3.8, 6.4, 9.0, 12, 17, 24, 37, 63, 127 and 255 ms. As in the former figure, darker curves indicate later times. Dashed line represents the initial spectrum of TPQ<sub>ox</sub>. The inset in panel (A) shows the absorbance changes at 495 nm in the N381A mutant, highlighted by open circles. The theoretical line is obtained by single-exponential kinetics.

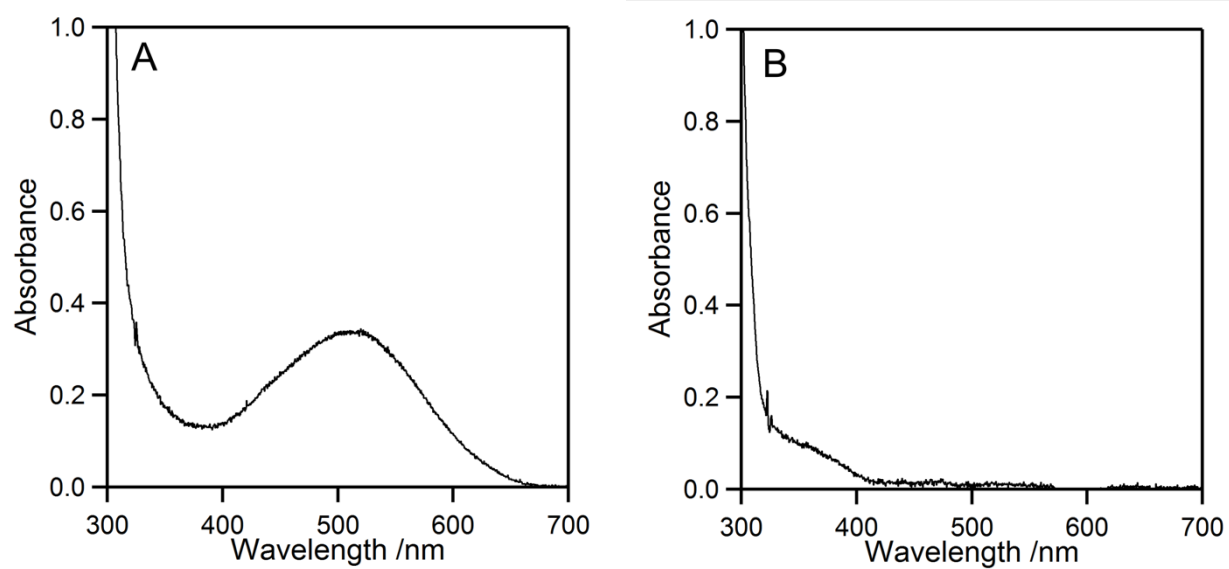

**Figure S4.** UV/vis absorption spectra of the N381A crystals. (A) N381A<sub>holo</sub> and (B) N381A<sub>holo</sub>/PEA.



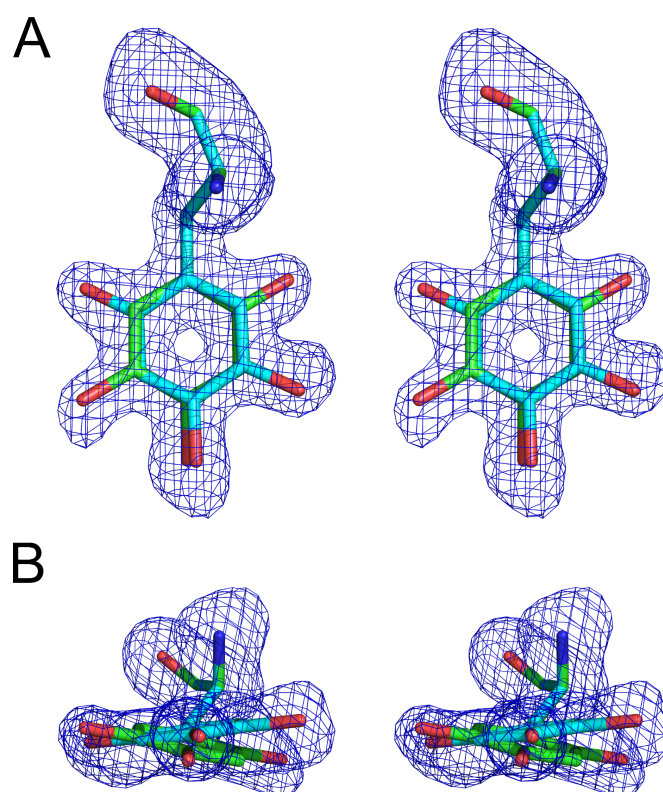

**Figure S5.** Structure of the cofactor of the N381A mutant of AGAO. (A) Stereo diagram of the refined model of TPQ<sub>ox</sub>. (B) Identical representation of (A) seen along the direction parallel to the TPQ ring. The normal and flipped conformations of TPQ are shown in green and cyan, respectively. An  $F_o-F_c$  omit map, calculated without the contribution of TPQ, is shown as a blue mesh at  $3.0 \sigma$ .

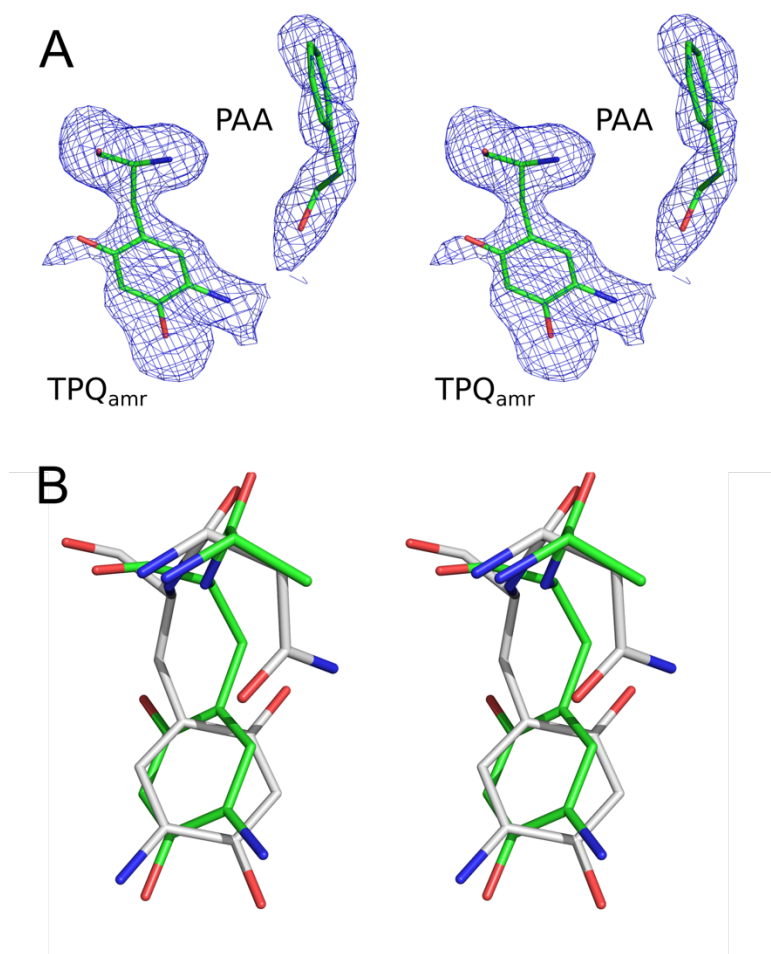

**Figure S6.** Structure of the active site of the TPQ<sub>amr</sub> intermediate of the N381A mutant formed by reaction with 2-PEA. (A) Refined model of TPQ<sub>amr</sub> and phenylacetaldehyde (PAA). An annealed  $F_o - F_c$  omit map, calculated without contributions of TPQ and PAA, is shown as a blue mesh at  $2.3 \sigma$ . (B) The refined model of TPQ<sub>amr</sub> of the N381A mutant (green) was superimposed to that of the WT AGAO (white) [S4].

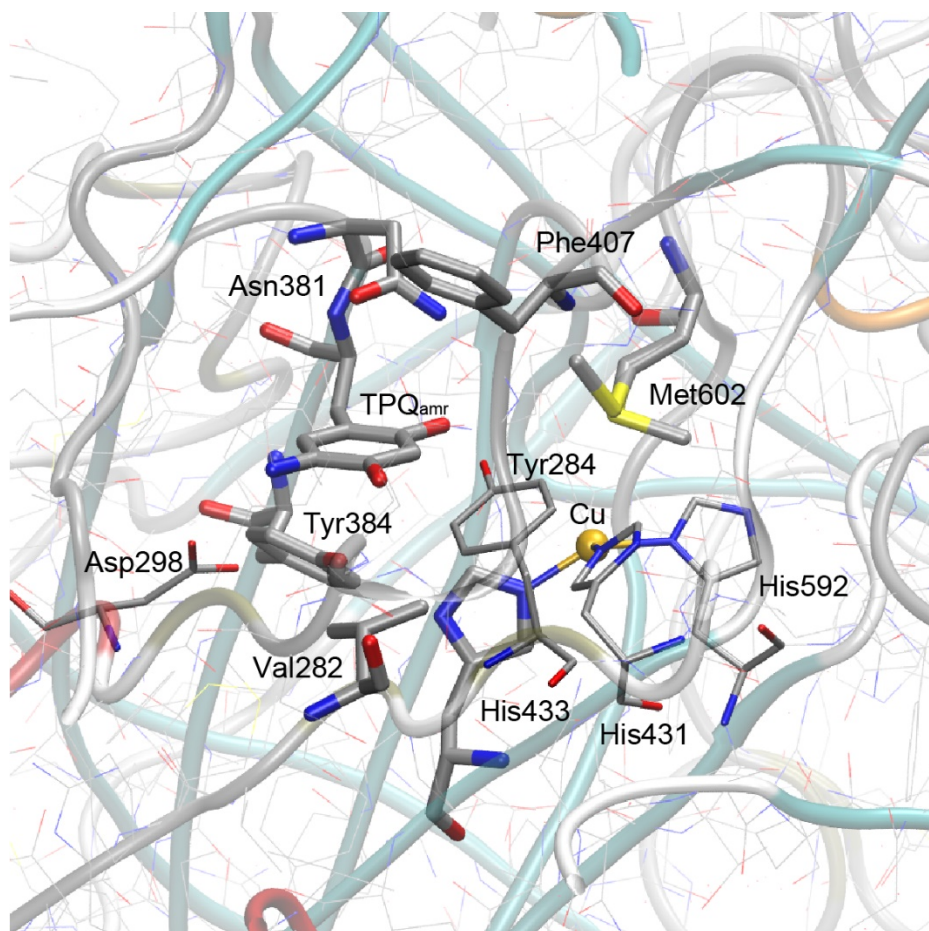

**Figure S7.** Amino acid residues surrounding the TPQ<sub>amr</sub> (TPQ382) displayed in a tube representation. Amino acid residues highlighted as thicker tubes are the ones preventing the conformational change of the TPQ ring (see text for details). The molecular structure is taken from the crystal structure of AGAO (PDBID:3x3z) [S4]. An inhibitor Cl<sup>-</sup> anion coordinated to the Cu cation is omitted.

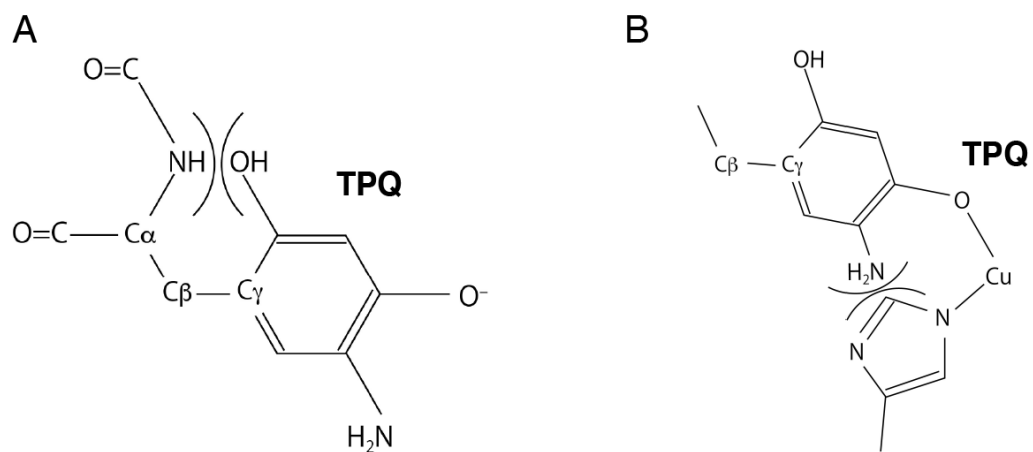

**Figure S8.** Steric hindrance acting during the TPQ conformational changes. (A) Counterclockwise-ring rotation of TPQ in pathway (II); (B) counterclockwise-ring rotation of TPQ in pathway (IV).

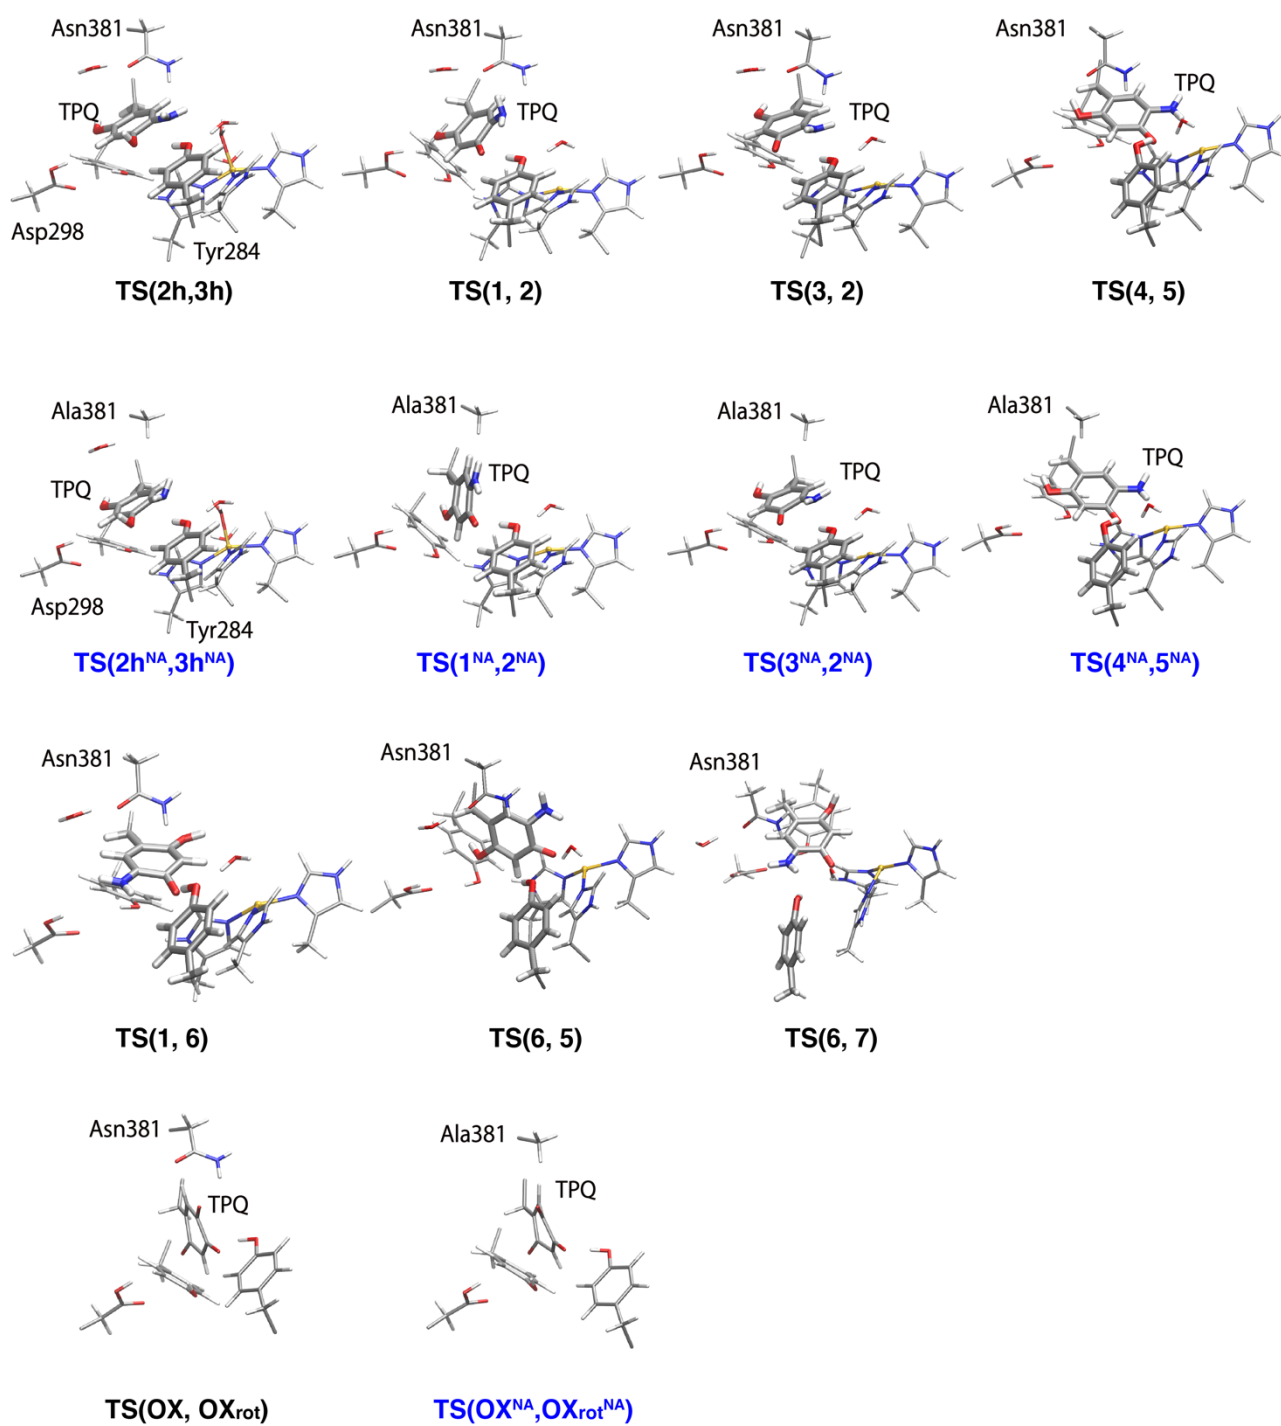

**Figure S9.** Molecular structures of the transition states. Details are discussed in the main text.

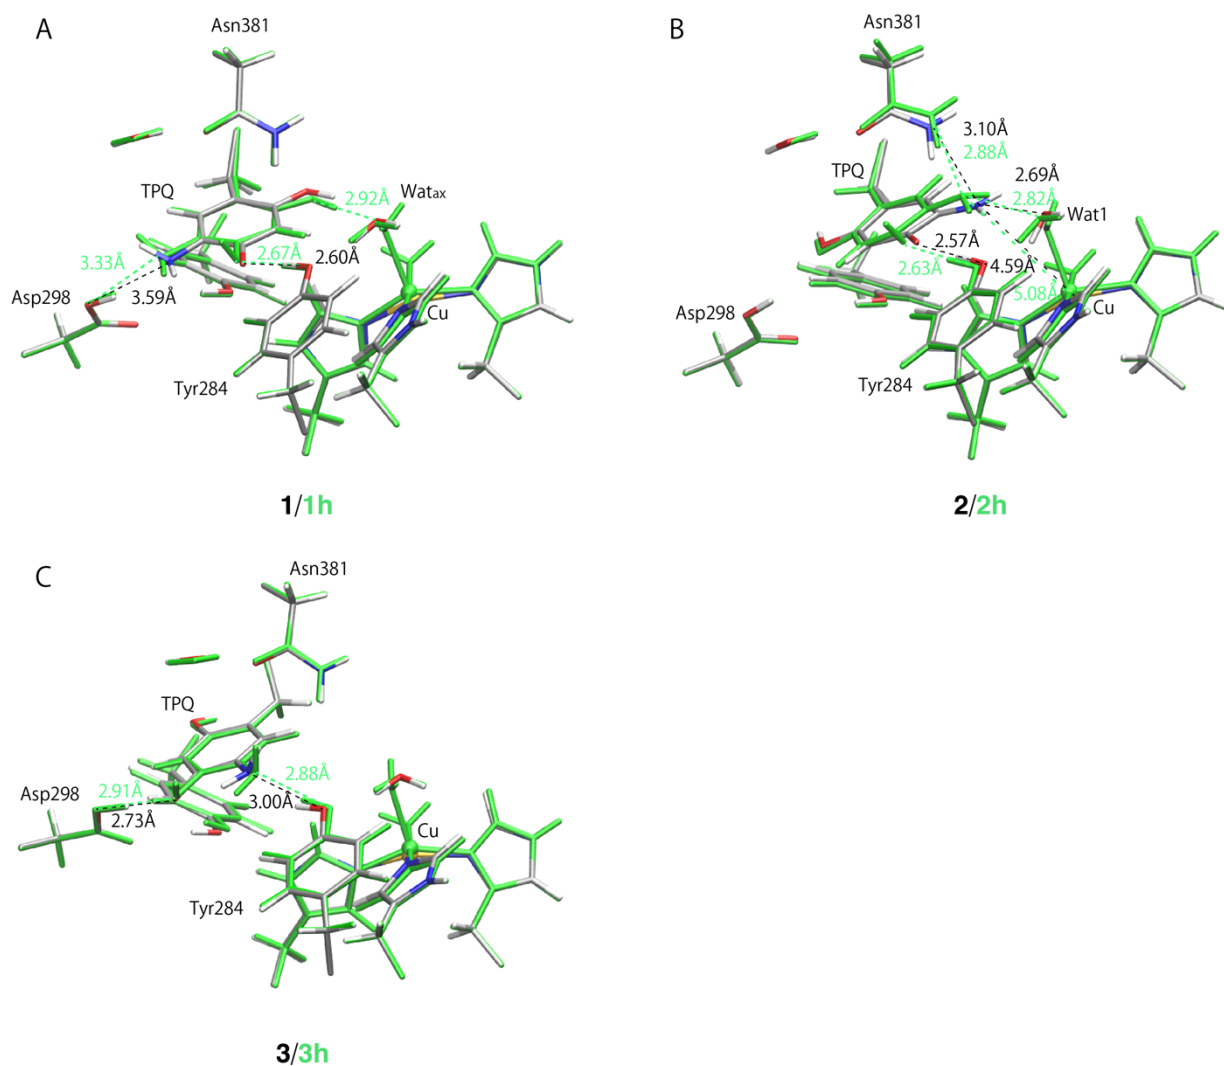

**Figure S10.** Superimposed structures realized upon the deprotonation of O4H-TPQ. (A) **1/1h**, (B) **2/2h** and (C) **3/3h**. Protonated states of TPQ<sub>amr</sub> (**1h**, **2h**, **3h**) are colored in green. The corresponding deprotonated states of TPQ<sub>sq</sub> (**1**, **2**, **3**) are colored according to the standard colors of the chemical elements (H=white, C=gray, N=blue, O=red). The Cu metal atom is highlighted as a green sphere.

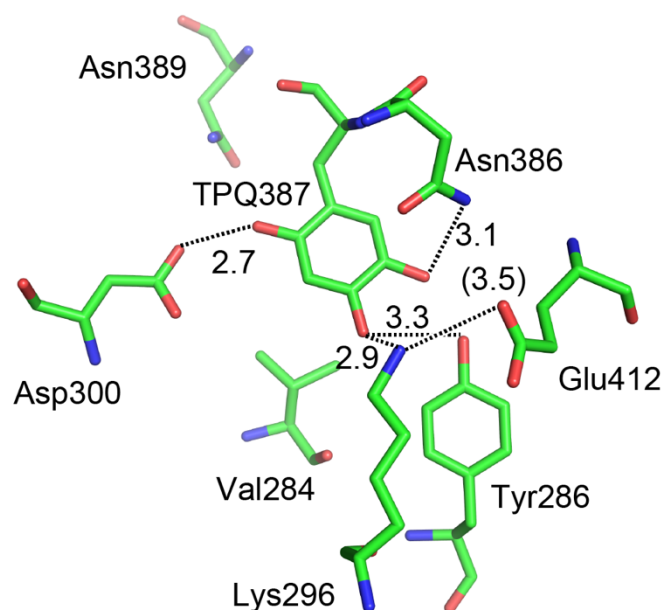

**Figure S11.** Active-site structure of the copper amine oxidase in *Pisum sativum* (PDB ID:1KSI) [S5]. The active-site residues including TPQ<sub>ox</sub> are the ones corresponding to the X-ray crystal structure. Dotted lines indicate the hydrogen bonds. The numerical values in the figure show the length of hydrogen bonds in Å. The short O-N distance (3.5 Å) although not representing a hydrogen bond, is reported in parentheses as a complementary piece of information.

## References

- [S1] Matsuzaki, R.; Fukui, T.; Sato, H.; Ozaki, Y.; Tanizawa K. FEBS Lett 1994, 351, 360–364.
- [S2] Kishishita, S.; Okajima T.; Kim, M.; Yamaguchi, H.; Hirota, S.; Suzuki, S.; Kuroda, S.; Tanizawa, K.; Mure M. J. Am. Chem. Soc. 2003, 125, 1041–1055.
- [S3] Chiu, Y. C.; Okajima, T.; Murakawa, T.; Uchida, M.; Taki, M.; Hirota, S.; Kim, M.; Yamaguchi, H.; Kawano, Y.; Kamiya, N.; Kuroda, S.; Hayashi, H.; Yamamoto, Y.; Tanizawa, K. Biochemistry 2006, 45, 4105–4120.
- [S4] Murakawa, T.; Hamaguchi, A.; Nakanishi, S.; Kataoka, M.; Nakai, T.; Kawano, Y.; Yamaguchi, H.; Hayashi, H.; Tanizawa, K.; Okajima, T. J. Biol. Chem. 2015, 290, 23094–23109.
- [S5] Kumar, V.; Dooley, D. M.; Freeman, H. C.; Guss, J. M.; Harvey, I.; McGuirl, M. A.; Wilce, M. C.; Zubak, V. M. Structure 1996, 4, 943–955.



|     |        |        |         |       |       |         |         |           |        |         |         |
|-----|--------|--------|---------|-------|-------|---------|---------|-----------|--------|---------|---------|
| 117 |        |        | C       | 0.912 | 5.707 | -15.627 | O       | 2.342     | -0.525 | -15.533 |         |
| 1h  |        |        | H       | 0.569 | 5.431 | -14.632 | H       | 1.942     | 0.173  | -16.083 |         |
| C   | 11.985 | -0.662 | -21.880 | C     | 1.964 | 5.005   | -16.209 | H         | 1.634  | -1.166  | -15.339 |
| H   | 12.207 | -1.680 | -22.204 | H     | 2.446 | 4.183   | -15.687 | C         | 12.639 | -0.420  | -20.513 |
| H   | 12.439 | 0.020  | -22.599 | C     | 2.428 | 5.393   | -17.466 | C         | 5.612  | 10.835  | -20.532 |
| C   | 10.483 | -0.528 | -21.797 | O     | 3.512 | 4.727   | -18.001 | C         | -0.999 | 1.752   | -24.264 |
| C   | 9.814  | 0.695  | -21.666 | H     | 3.835 | 5.260   | -18.750 | C         | -0.776 | 3.097   | -20.692 |
| H   | 10.373 | 1.627  | -21.702 | C     | 1.813 | 6.432   | -18.161 | C         | -2.130 | 6.922   | -15.555 |
| C   | 8.438  | 0.731  | -21.447 | H     | 2.193 | 6.726   | -19.133 | C         | 10.449 | -1.674  | -17.150 |
| H   | 7.927  | 1.680  | -21.324 | C     | 0.761 | 7.117   | -17.567 | C         | 7.588  | 3.912   | -14.087 |
| C   | 7.706  | -0.460 | -21.364 | H     | 0.296 | 7.942   | -18.100 | C         | 7.265  | -3.615  | -13.175 |
| O   | 6.353  | -0.448 | -21.104 | C     | 9.470 | -1.139  | -18.228 |           |        |         |         |
| H   | 6.018  | 0.475  | -21.209 | H     | 9.772 | -1.548  | -19.194 |           |        |         |         |
| C   | 8.344  | -1.686 | -21.533 | H     | 9.570 | -0.054  | -18.308 | 117       |        |         |         |
| H   | 7.765  | -2.605 | -21.490 | C     | 8.051 | -1.485  | -17.927 | TS(1h,2h) |        |         |         |
| C   | 9.721  | -1.698 | -21.740 | N     | 7.482 | -2.724  | -18.191 | C         | 12.003 | -0.664  | -21.891 |
| H   | 10.258 | -2.633 | -21.828 | H     | 7.932 | -3.495  | -18.686 | H         | 12.225 | -1.684  | -22.206 |
| C   | 4.717  | 9.922  | -19.645 | C     | 6.229 | -2.738  | -17.697 | H         | 12.474 | 0.013   | -22.606 |
| H   | 3.673  | 10.234 | -19.754 | H     | 5.556 | -3.575  | -17.762 | C         | 10.501 | -0.529  | -21.833 |
| H   | 5.008  | 10.042 | -18.602 | N     | 5.954 | -1.565  | -17.137 | C         | 9.835  | 0.687   | -21.652 |
| C   | 4.761  | 8.413  | -19.942 | C     | 7.077 | -0.772  | -17.279 | H         | 10.389 | 1.622   | -21.651 |
| O   | 4.504  | 7.589  | -19.083 | H     | 7.117 | 0.236   | -16.898 | C         | 8.460  | 0.714   | -21.429 |
| O   | 4.993  | 8.044  | -21.209 | C     | 6.052 | 3.707   | -14.061 | H         | 7.963  | 1.661   | -21.266 |
| H   | 4.926  | 7.060  | -21.234 | H     | 5.565 | 4.677   | -14.213 | C         | 7.725  | -0.477  | -21.386 |
| C   | 0.022  | 0.604  | -24.448 | H     | 5.772 | 3.368   | -13.060 | O         | 6.372  | -0.475  | -21.097 |
| H   | 0.175  | 0.463  | -25.516 | C     | 5.537 | 2.708   | -15.056 | H         | 6.097  | 0.463   | -20.983 |
| H   | -0.403 | -0.318 | -24.049 | N     | 4.949 | 3.037   | -16.266 | C         | 8.356  | -1.693  | -21.635 |
| C   | 1.374  | 0.947  | -23.816 | H     | 4.783 | 3.959   | -16.679 | H         | 7.777  | -2.613  | -21.637 |
| O   | 2.113  | 1.846  | -24.245 | C     | 4.474 | 1.918   | -16.849 | C         | 9.732  | -1.696  | -21.855 |
| N   | 1.727  | 0.206  | -22.749 | H     | 3.959 | 1.917   | -17.796 | H         | 10.264 | -2.622  | -22.024 |
| H   | 1.051  | -0.426 | -22.321 | N     | 4.727 | 0.865   | -16.076 | C         | 4.731  | 9.932   | -19.638 |
| H   | 2.518  | 0.522  | -22.202 | C     | 5.387 | 1.346   | -14.956 | H         | 3.681  | 10.202  | -19.787 |
| C   | 0.406  | 3.640  | -19.869 | H     | 5.688 | 0.690   | -14.152 | H         | 4.996  | 10.091  | -18.594 |
| H   | 0.223  | 3.394  | -18.818 | C     | 6.307 | -2.793  | -14.036 | C         | 4.870  | 8.438   | -19.915 |
| H   | 0.401  | 4.730  | -19.935 | H     | 6.842 | -2.466  | -14.931 | O         | 4.829  | 7.591   | -19.044 |
| C   | 1.758  | 3.159  | -20.272 | H     | 6.040 | -1.889  | -13.471 | O         | 4.952  | 8.099   | -21.209 |
| C   | 2.311  | 1.923  | -19.880 | C     | 5.024 | -3.499  | -14.417 | H         | 4.959  | 7.123   | -21.247 |
| C   | 2.562  | 4.049  | -20.967 | N     | 4.109 | -2.923  | -15.306 | C         | -0.332 | 0.444   | -24.564 |
| H   | 2.162  | 5.028  | -21.211 | C     | 3.068 | -3.753  | -15.386 | H         | -0.431 | 0.230   | -25.615 |
| C   | 3.582  | 1.569  | -20.339 | H     | 2.187 | -3.606  | -15.992 | H         | -0.820 | -0.364  | -24.023 |
| H   | 4.000  | 0.591  | -20.114 | N     | 3.254 | -4.824  | -14.600 | C         | 1.142  | 0.508   | -24.308 |
| C   | 3.872  | 3.769  | -21.342 | H     | 2.614 | -5.631  | -14.519 | O         | 1.862  | 1.428   | -24.749 |
| C   | 4.326  | 2.474  | -21.098 | C     | 4.477 | -4.684  | -13.979 | N         | 1.624  | -0.544  | -23.635 |
| O   | 1.600  | 1.098  | -19.050 | H     | 4.827 | -5.419  | -13.269 | H         | 0.961  | -1.122  | -23.122 |
| H   | 2.124  | 0.287  | -18.893 | CU    | 4.240 | -1.092  | -16.239 | H         | 2.559  | -0.432  | -23.240 |
| N   | 4.656  | 4.803  | -21.894 | O     | 4.529 | -2.235  | -20.175 | C         | 0.567  | 3.873   | -20.181 |
| H   | 5.599  | 4.508  | -22.146 | H     | 5.221 | -1.600  | -20.488 | H         | 0.412  | 4.009   | -19.102 |
| H   | 4.232  | 5.198  | -22.733 | H     | 4.983 | -3.121  | -20.213 | H         | 0.641  | 4.879   | -20.620 |
| O   | 5.547  | 2.041  | -21.625 | O     | 3.365 | 3.203   | -26.299 | C         | 1.871  | 3.167   | -20.458 |
| H   | 5.456  | 2.031  | -22.594 | H     | 3.138 | 4.138   | -26.133 | C         | 2.975  | 3.814   | -19.897 |
| C   | -0.764 | 7.618  | -15.635 | H     | 2.805 | 2.698   | -25.675 | C         | 2.146  | 2.123   | -21.348 |
| H   | -0.454 | 7.908  | -14.622 | O     | 3.074 | -1.277  | -18.214 | H         | 1.375  | 1.525   | -21.816 |
| H   | -0.893 | 8.541  | -16.202 | H     | 3.670 | -1.675  | -18.926 | C         | 4.276  | 3.451   | -20.178 |
| C   | 0.306  | 6.783  | -16.287 | H     | 2.287 | -1.843  | -18.177 | H         | 5.079  | 4.078   | -19.875 |

|   |        |        |         |     |        |        |         |   |        |        |         |
|---|--------|--------|---------|-----|--------|--------|---------|---|--------|--------|---------|
| C | 3.453  | 1.821  | -21.724 | H   | 2.620  | -5.647 | -14.519 | O | 1.957  | 1.679  | -24.306 |
| C | 4.504  | 2.456  | -21.088 | C   | 4.477  | -4.700 | -13.961 | N | 1.716  | -0.397 | -23.435 |
| O | 2.839  | 4.923  | -19.142 | H   | 4.818  | -5.431 | -13.243 | H | 1.028  | -1.024 | -23.023 |
| H | 1.940  | 5.008  | -18.791 | CU  | 4.267  | -1.114 | -16.193 | H | 2.548  | -0.294 | -22.860 |
| N | 3.737  | 1.022  | -22.833 | O   | 4.483  | -2.297 | -20.090 | C | 0.642  | 4.034  | -20.240 |
| H | 4.655  | 0.599  | -22.867 | H   | 5.179  | -1.648 | -20.336 | H | 0.560  | 4.179  | -19.156 |
| H | 3.410  | 1.393  | -23.727 | H   | 4.949  | -3.176 | -20.164 | H | 0.607  | 5.037  | -20.683 |
| O | 5.798  | 2.125  | -21.435 | O   | 3.367  | 3.118  | -26.344 | C | 1.953  | 3.362  | -20.602 |
| H | 5.795  | 2.016  | -22.402 | H   | 3.114  | 4.017  | -26.067 | C | 3.075  | 4.102  | -21.028 |
| C | -0.858 | 7.778  | -15.558 | H   | 2.730  | 2.527  | -25.898 | C | 2.091  | 1.973  | -20.552 |
| H | -0.700 | 8.212  | -14.560 | O   | 3.081  | -1.391 | -18.012 | H | 1.259  | 1.362  | -20.208 |
| H | -1.015 | 8.608  | -16.246 | H   | 3.586  | -1.770 | -18.786 | C | 4.201  | 3.476  | -21.547 |
| C | 0.354  | 7.023  | -15.955 | H   | 2.155  | -1.655 | -18.108 | H | 5.029  | 4.063  | -21.930 |
| C | 1.005  | 6.156  | -15.074 | O   | 2.471  | -0.557 | -15.253 | C | 3.231  | 1.319  | -21.016 |
| H | 0.557  | 5.943  | -14.106 | H   | 2.061  | 0.197  | -15.709 | C | 4.247  | 2.094  | -21.577 |
| C | 2.244  | 5.618  | -15.400 | H   | 1.771  | -1.225 | -15.140 | O | 3.159  | 5.476  | -20.926 |
| H | 2.798  | 4.986  | -14.712 | C   | 12.639 | -0.421 | -20.515 | H | 2.317  | 5.810  | -20.584 |
| C | 2.829  | 5.986  | -16.605 | C   | 5.616  | 10.843 | -20.531 | N | 3.282  | -0.086 | -21.043 |
| O | 4.096  | 5.546  | -16.870 | C   | -1.068 | 1.762  | -24.280 | H | 4.198  | -0.473 | -21.203 |
| H | 4.437  | 6.115  | -17.586 | C   | -0.687 | 3.209  | -20.726 | H | 2.854  | -0.515 | -20.233 |
| C | 2.166  | 6.809  | -17.521 | C   | -2.127 | 6.932  | -15.548 | O | 5.342  | 1.435  | -22.142 |
| H | 2.650  | 7.096  | -18.443 | C   | 10.445 | -1.674 | -17.152 | H | 5.283  | 1.471  | -23.113 |
| C | 0.921  | 7.308  | -17.193 | C   | 7.586  | 3.912  | -14.087 | C | -0.755 | 7.690  | -15.639 |
| H | 0.403  | 7.974  | -17.881 | C   | 7.267  | -3.617 | -13.171 | H | -0.461 | 8.003  | -14.628 |
| C | 9.473  | -1.140 | -18.236 |     |        |        |         | H | -0.921 | 8.599  | -16.218 |
| H | 9.778  | -1.548 | -19.202 |     |        |        |         | C | 0.342  | 6.891  | -16.281 |
| H | 9.572  | -0.055 | -18.314 | 117 |        |        |         | C | 0.890  | 5.753  | -15.676 |
| C | 8.055  | -1.486 | -17.935 | 2h  |        |        |         | H | 0.492  | 5.412  | -14.723 |
| N | 7.492  | -2.730 | -18.181 | C   | 11.988 | -0.663 | -21.881 | C | 1.942  | 5.060  | -16.267 |
| H | 7.942  | -3.504 | -18.673 | H   | 12.234 | -1.671 | -22.216 | H | 2.371  | 4.179  | -15.796 |
| C | 6.246  | -2.747 | -17.672 | H   | 12.417 | 0.040  | -22.594 | C | 2.474  | 5.523  | -17.470 |
| H | 5.572  | -3.585 | -17.723 | C   | 10.485 | -0.581 | -21.779 | O | 3.531  | 4.835  | -18.021 |
| N | 5.971  | -1.572 | -17.119 | C   | 9.773  | 0.622  | -21.690 | H | 3.866  | 5.365  | -18.770 |
| C | 7.086  | -0.772 | -17.282 | H   | 10.295 | 1.570  | -21.786 | C | 1.937  | 6.648  | -18.094 |
| H | 7.122  | 0.239  | -16.911 | C   | 8.406  | 0.613  | -21.419 | H | 2.402  | 7.050  | -18.984 |
| C | 6.048  | 3.712  | -14.074 | H   | 7.854  | 1.543  | -21.325 | C | 0.874  | 7.315  | -17.499 |
| H | 5.569  | 4.680  | -14.257 | C   | 7.733  | -0.602 | -21.242 | H | 0.466  | 8.200  | -17.982 |
| H | 5.756  | 3.393  | -13.070 | O   | 6.400  | -0.619 | -20.890 | C | 9.477  | -1.134 | -18.222 |
| C | 5.538  | 2.697  | -15.058 | H   | 6.004  | 0.215  | -21.242 | H | 9.781  | -1.537 | -19.187 |
| N | 4.950  | 3.018  | -16.269 | C   | 8.410  | -1.809 | -21.383 | H | 9.575  | -0.048 | -18.296 |
| H | 4.754  | 3.974  | -16.609 | H   | 7.870  | -2.744 | -21.262 | C | 8.061  | -1.482 | -17.918 |
| C | 4.484  | 1.893  | -16.845 | C   | 9.778  | -1.779 | -21.638 | N | 7.502  | -2.731 | -18.155 |
| H | 3.986  | 1.870  | -17.805 | H   | 10.356 | -2.694 | -21.671 | H | 7.952  | -3.503 | -18.650 |
| N | 4.741  | 0.845  | -16.064 | C   | 4.734  | 9.935  | -19.632 | C | 6.257  | -2.751 | -17.644 |
| C | 5.398  | 1.335  | -14.948 | H   | 3.686  | 10.231 | -19.749 | H | 5.588  | -3.591 | -17.692 |
| H | 5.704  | 0.684  | -14.143 | H   | 5.025  | 10.072 | -18.592 | N | 5.975  | -1.570 | -17.106 |
| C | 6.304  | -2.799 | -14.024 | C   | 4.806  | 8.434  | -19.924 | C | 7.088  | -0.767 | -17.274 |
| H | 6.833  | -2.468 | -14.921 | O   | 4.659  | 7.598  | -19.052 | H | 7.120  | 0.248  | -16.915 |
| H | 6.032  | -1.899 | -13.457 | O   | 4.917  | 8.086  | -21.213 | C | 6.048  | 3.724  | -14.082 |
| C | 5.030  | -3.519 | -14.402 | H   | 4.754  | 7.121  | -21.259 | H | 5.574  | 4.698  | -14.246 |
| N | 4.131  | -2.953 | -15.306 | C   | -0.200 | 0.524  | -24.536 | H | 5.752  | 3.394  | -13.083 |
| C | 3.090  | -3.778 | -15.399 | H   | -0.158 | 0.352  | -25.605 | C | 5.533  | 2.723  | -15.079 |
| H | 2.224  | -3.634 | -16.026 | H   | -0.679 | -0.345 | -24.086 | N | 4.942  | 3.037  | -16.293 |
| N | 3.262  | -4.842 | -14.598 | C   | 1.243  | 0.690  | -24.068 | H | 4.782  | 3.957  | -16.715 |



|   |        |        |         |    |       |        |         |      |        |        |         |
|---|--------|--------|---------|----|-------|--------|---------|------|--------|--------|---------|
| C | 11.909 | -0.651 | -21.861 | C  | 1.890 | 4.966  | -15.949 | H    | 1.757  | -1.292 | -15.213 |
| H | 12.088 | -1.679 | -22.186 | H  | 2.227 | 4.039  | -15.492 | C    | 12.627 | -0.420 | -20.518 |
| H | 12.365 | 0.007  | -22.602 | C  | 2.561 | 5.476  | -17.058 | C    | 5.615  | 10.842 | -20.534 |
| C | 10.402 | -0.440 | -21.754 | O  | 3.607 | 4.758  | -17.600 | C    | -0.996 | 1.725  | -24.288 |
| C | 9.791  | 0.820  | -21.662 | H  | 3.877 | 5.218  | -18.416 | C    | -0.879 | 2.813  | -20.688 |
| H | 10.397 | 1.721  | -21.708 | C  | 2.165 | 6.668  | -17.649 | C    | -2.139 | 6.918  | -15.545 |
| C | 8.408  | 0.943  | -21.482 | H  | 2.727 | 7.070  | -18.477 | C    | 10.451 | -1.674 | -17.150 |
| H | 7.963  | 1.930  | -21.388 | C  | 1.043 | 7.320  | -17.172 | C    | 7.589  | 3.911  | -14.084 |
| C | 7.591  | -0.189 | -21.399 | H  | 0.710 | 8.232  | -17.661 | C    | 7.269  | -3.618 | -13.172 |
| O | 6.232  | -0.127 | -21.181 | C  | 9.481 | -1.142 | -18.235 |      |        |        |         |
| H | 5.838  | 0.782  | -21.295 | H  | 9.796 | -1.541 | -19.200 |      |        |        |         |
| C | 8.177  | -1.452 | -21.518 | H  | 9.571 | -0.055 | -18.308 |      |        |        |         |
| H | 7.550  | -2.338 | -21.468 | C  | 8.065 | -1.504 | -17.950 | 110  |        |        |         |
| C | 9.558  | -1.556 | -21.689 | N  | 7.505 | -2.741 | -18.240 | 1hNA |        |        |         |
| H | 10.016 | -2.536 | -21.745 | H  | 7.962 | -3.503 | -18.744 | C    | 11.997 | -0.660 | -21.887 |
| C | 4.726  | 9.924  | -19.655 | C  | 6.256 | -2.778 | -17.737 | H    | 12.220 | -1.679 | -22.207 |
| H | 3.677  | 10.199 | -19.804 | H  | 5.585 | -3.615 | -17.826 | H    | 12.459 | 0.021  | -22.602 |
| H | 4.986  | 10.069 | -18.608 | N  | 5.979 | -1.622 | -17.146 | C    | 10.495 | -0.526 | -21.812 |
| C | 4.862  | 8.429  | -19.946 | C  | 7.091 | -0.815 | -17.279 | C    | 9.829  | 0.696  | -21.670 |
| O | 4.763  | 7.587  | -19.072 | H  | 7.121 | 0.186  | -16.880 | H    | 10.387 | 1.630  | -21.708 |
| O | 4.999  | 8.088  | -21.233 | C  | 6.056 | 3.693  | -14.043 | C    | 8.456  | 0.730  | -21.431 |
| H | 5.053  | 7.103  | -21.274 | H  | 5.559 | 4.648  | -14.245 | H    | 7.948  | 1.678  | -21.298 |
| C | 0.005  | 0.563  | -24.495 | H  | 5.779 | 3.402  | -13.026 | C    | 7.726  | -0.460 | -21.337 |
| H | 0.146  | 0.432  | -25.564 | C  | 5.558 | 2.639  | -14.987 | O    | 6.381  | -0.449 | -21.034 |
| H | -0.431 | -0.358 | -24.108 | N  | 4.978 | 2.924  | -16.206 | H    | 6.059  | 0.483  | -21.066 |
| C | 1.388  | 0.847  | -23.895 | H  | 4.767 | 3.845  | -16.613 | C    | 8.357  | -1.686 | -21.535 |
| O | 2.112  | 1.789  | -24.246 | C  | 4.523 | 1.784  | -16.760 | H    | 7.776  | -2.604 | -21.497 |
| N | 1.805  | -0.053 | -22.981 | H  | 4.015 | 1.731  | -17.712 | C    | 9.730  | -1.696 | -21.764 |
| H | 1.156  | -0.727 | -22.581 | N  | 4.787 | 0.758  | -15.955 | H    | 10.265 | -2.629 | -21.876 |
| H | 2.710  | 0.080  | -22.551 | C  | 5.433 | 1.277  | -14.846 | C    | 4.711  | 9.931  | -19.645 |
| C | 0.345  | 2.555  | -19.786 | H  | 5.746 | 0.645  | -14.027 | H    | 3.668  | 10.246 | -19.761 |
| H | 0.529  | 1.474  | -19.774 | C  | 6.302 | -2.811 | -14.032 | H    | 4.996  | 10.066 | -18.603 |
| H | 0.069  | 2.812  | -18.756 | H  | 6.831 | -2.479 | -14.929 | C    | 4.758  | 8.419  | -19.921 |
| C | 1.608  | 3.251  | -20.225 | H  | 6.020 | -1.910 | -13.469 | O    | 4.493  | 7.615  | -19.042 |
| C | 1.729  | 4.650  | -20.168 | C  | 5.037 | -3.549 | -14.409 | O    | 4.997  | 8.023  | -21.176 |
| C | 2.687  | 2.517  | -20.734 | N  | 4.153 | -3.023 | -15.351 | H    | 4.959  | 7.035  | -21.166 |
| H | 2.598  | 1.436  | -20.788 | C  | 3.111 | -3.848 | -15.423 | C    | 0.006  | 0.597  | -24.414 |
| C | 2.900  | 5.265  | -20.596 | H  | 2.252 | -3.728 | -16.065 | H    | 0.231  | 0.463  | -25.469 |
| H | 2.995  | 6.341  | -20.563 | N  | 3.271 | -4.875 | -14.575 | H    | -0.430 | -0.320 | -24.022 |
| C | 3.858  | 3.113  | -21.204 | H  | 2.629 | -5.677 | -14.484 | H    | 0.916  | 0.817  | -23.843 |
| C | 3.941  | 4.508  | -21.104 | C  | 4.476 | -4.709 | -13.928 | C    | 0.434  | 3.755  | -19.943 |
| O | 0.755  | 5.481  | -19.719 | H  | 4.806 | -5.413 | -13.177 | H    | 0.265  | 3.567  | -18.877 |
| H | 0.150  | 5.021  | -19.116 | CU | 4.294 | -1.181 | -16.190 | H    | 0.426  | 4.841  | -20.074 |
| N | 4.887  | 2.326  | -21.851 | O  | 4.554 | -2.120 | -20.237 | C    | 1.784  | 3.253  | -20.326 |
| H | 4.560  | 2.066  | -22.786 | H  | 5.206 | -1.446 | -20.546 | C    | 2.265  | 1.972  | -19.986 |
| H | 5.726  | 2.891  | -21.989 | H  | 5.035 | -2.985 | -20.246 | C    | 2.656  | 4.147  | -20.931 |
| O | 5.084  | 5.191  | -21.473 | O  | 3.430 | 3.150  | -26.318 | H    | 2.311  | 5.157  | -21.127 |
| H | 5.312  | 4.912  | -22.370 | H  | 3.213 | 4.079  | -26.116 | C    | 3.541  | 1.589  | -20.402 |
| C | -0.797 | 7.657  | -15.554 | H  | 2.885 | 2.640  | -25.688 | H    | 3.895  | 0.576  | -20.239 |
| H | -0.578 | 8.014  | -14.537 | O  | 3.247 | -1.077 | -18.136 | C    | 3.973  | 3.834  | -21.247 |
| H | -0.911 | 8.544  | -16.180 | H  | 3.740 | -1.494 | -18.898 | C    | 4.364  | 2.510  | -21.047 |
| C | 0.347  | 6.840  | -16.065 | H  | 2.310 | -1.052 | -18.374 | O    | 1.482  | 1.144  | -19.236 |
| C | 0.797  | 5.668  | -15.445 | O  | 2.513 | -0.676 | -15.221 | H    | 1.963  | 0.310  | -19.087 |
| H | 0.285  | 5.304  | -14.559 | H  | 2.171 | 0.193  | -15.489 | N    | 4.839  | 4.865  | -21.692 |
|   |        |        |         |    |       |        |         | H    | 5.796  | 4.536  | -21.819 |

|    |        |        |         |               |        |        |         |   |        |        |         |
|----|--------|--------|---------|---------------|--------|--------|---------|---|--------|--------|---------|
| H  | 4.551  | 5.239  | -22.597 | H             | 4.973  | -3.129 | -20.207 | C | 3.272  | 1.734  | -21.763 |
| O  | 5.625  | 2.072  | -21.476 | O             | 3.046  | -1.238 | -18.224 | C | 4.385  | 2.384  | -21.238 |
| H  | 5.619  | 2.041  | -22.447 | H             | 3.636  | -1.650 | -18.931 | O | 2.844  | 5.064  | -19.425 |
| C  | -0.772 | 7.628  | -15.628 | H             | 2.245  | -1.787 | -18.202 | H | 2.016  | 5.109  | -18.919 |
| H  | -0.470 | 7.923  | -14.614 | O             | 2.365  | -0.545 | -15.498 | N | 3.364  | 0.876  | -22.830 |
| H  | -0.906 | 8.550  | -16.196 | H             | 1.963  | 0.165  | -16.029 | H | 2.571  | 0.327  | -23.116 |
| C  | 0.304  | 6.800  | -16.275 | H             | 1.665  | -1.199 | -15.324 | H | 4.220  | 0.752  | -23.341 |
| C  | 0.912  | 5.726  | -15.614 | C             | 12.640 | -0.420 | -20.514 | O | 5.667  | 1.947  | -21.563 |
| H  | 0.564  | 5.443  | -14.623 | C             | 5.611  | 10.835 | -20.536 | H | 5.763  | 1.918  | -22.525 |
| C  | 1.974  | 5.033  | -16.190 | C             | -1.002 | 1.757  | -24.257 | C | -0.874 | 7.739  | -15.547 |
| H  | 2.461  | 4.216  | -15.664 | C             | -0.755 | 3.163  | -20.717 | H | -0.684 | 8.129  | -14.537 |
| C  | 2.440  | 5.427  | -17.443 | C             | -2.133 | 6.923  | -15.555 | H | -1.029 | 8.601  | -16.196 |
| O  | 3.531  | 4.773  | -17.975 | C             | 10.443 | -1.675 | -17.150 | C | 0.309  | 6.981  | -16.011 |
| H  | 3.861  | 5.321  | -18.711 | C             | 7.588  | 3.911  | -14.085 | C | 0.977  | 6.080  | -15.179 |
| C  | 1.821  | 6.462  | -18.141 | C             | 7.265  | -3.615 | -13.177 | H | 0.553  | 5.835  | -14.209 |
| H  | 2.200  | 6.761  | -19.110 |               |        |        |         | C | 2.201  | 5.548  | -15.559 |
| C  | 0.763  | 7.141  | -17.550 |               |        |        |         | H | 2.766  | 4.879  | -14.917 |
| H  | 0.301  | 7.968  | -18.084 |               |        |        |         | C | 2.759  | 5.965  | -16.762 |
| C  | 9.471  | -1.139 | -18.232 | 113           |        |        |         | O | 4.011  | 5.529  | -17.074 |
| H  | 9.776  | -1.548 | -19.197 | TS(1hNA,2hNA) |        |        |         | H | 4.299  | 6.061  | -17.841 |
| H  | 9.572  | -0.055 | -18.311 | C             | 11.997 | -0.656 | -21.888 | C | 2.069  | 6.814  | -17.636 |
| C  | 8.051  | -1.486 | -17.936 | H             | 12.229 | -1.669 | -22.217 | H | 2.524  | 7.134  | -18.562 |
| N  | 7.484  | -2.726 | -18.200 | H             | 12.451 | 0.035  | -22.599 | C | 0.832  | 7.298  | -17.259 |
| H  | 7.936  | -3.494 | -18.699 | C             | 10.494 | -0.544 | -21.813 | H | 0.288  | 7.971  | -17.918 |
| C  | 6.230  | -2.739 | -17.715 | C             | 9.804  | 0.664  | -21.661 | C | 9.473  | -1.139 | -18.232 |
| H  | 5.554  | -3.574 | -17.788 | H             | 10.342 | 1.608  | -21.690 | H | 9.779  | -1.546 | -19.197 |
| N  | 5.951  | -1.566 | -17.157 | C             | 8.431  | 0.670  | -21.420 | H | 9.572  | -0.054 | -18.309 |
| C  | 7.075  | -0.773 | -17.294 | H             | 7.913  | 1.610  | -21.270 | C | 8.054  | -1.486 | -17.935 |
| H  | 7.111  | 0.235  | -16.914 | C             | 7.721  | -0.534 | -21.333 | N | 7.484  | -2.722 | -18.209 |
| C  | 6.050  | 3.705  | -14.066 | O             | 6.378  | -0.558 | -21.032 | H | 7.932  | -3.490 | -18.710 |
| H  | 5.565  | 4.675  | -14.223 | H             | 6.031  | 0.364  | -21.070 | C | 6.232  | -2.739 | -17.713 |
| H  | 5.765  | 3.365  | -13.068 | C             | 8.378  | -1.745 | -21.543 | H | 5.551  | -3.568 | -17.791 |
| C  | 5.539  | 2.708  | -15.066 | H             | 7.819  | -2.675 | -21.498 | N | 5.961  | -1.571 | -17.142 |
| N  | 4.959  | 3.038  | -16.280 | C             | 9.751  | -1.728 | -21.775 | C | 7.084  | -0.778 | -17.279 |
| H  | 4.796  | 3.962  | -16.692 | H             | 10.306 | -2.649 | -21.893 | H | 7.124  | 0.227  | -16.891 |
| C  | 4.485  | 1.921  | -16.867 | C             | 4.728  | 9.937  | -19.637 | C | 6.048  | 3.712  | -14.066 |
| H  | 3.976  | 1.918  | -17.820 | H             | 3.679  | 10.223 | -19.771 | H | 5.567  | 4.682  | -14.240 |
| N  | 4.730  | 0.867  | -16.093 | H             | 5.005  | 10.082 | -18.594 | H | 5.760  | 3.389  | -13.063 |
| C  | 5.384  | 1.345  | -14.970 | C             | 4.840  | 8.443  | -19.924 | C | 5.532  | 2.704  | -15.054 |
| H  | 5.675  | 0.688  | -14.165 | O             | 4.748  | 7.597  | -19.055 | N | 4.949  | 3.034  | -16.266 |
| C  | 6.310  | -2.792 | -14.040 | O             | 4.958  | 8.103  | -21.215 | H | 4.766  | 3.987  | -16.617 |
| H  | 6.846  | -2.466 | -14.935 | H             | 4.931  | 7.128  | -21.254 | C | 4.483  | 1.911  | -16.850 |
| H  | 6.041  | -1.889 | -13.475 | C             | -0.009 | 0.592  | -24.435 | H | 3.992  | 1.894  | -17.813 |
| C  | 5.027  | -3.498 | -14.424 | H             | 0.178  | 0.441  | -25.496 | N | 4.732  | 0.858  | -16.073 |
| N  | 4.118  | -2.927 | -15.322 | H             | -0.428 | -0.320 | -24.014 | C | 5.384  | 1.342  | -14.951 |
| C  | 3.077  | -3.756 | -15.404 | H             | 0.923  | 0.839  | -23.921 | H | 5.685  | 0.687  | -14.147 |
| H  | 2.201  | -3.614 | -16.019 | C             | 0.499  | 3.828  | -20.136 | C | 6.302  | -2.799 | -14.026 |
| N  | 3.257  | -4.823 | -14.609 | H             | 0.341  | 3.936  | -19.055 | H | 6.831  | -2.469 | -14.924 |
| H  | 2.615  | -5.627 | -14.529 | H             | 0.570  | 4.849  | -20.543 | H | 6.031  | -1.897 | -13.459 |
| C  | 4.476  | -4.680 | -13.984 | C             | 1.813  | 3.159  | -20.446 | C | 5.027  | -3.516 | -14.407 |
| H  | 4.823  | -5.412 | -13.268 | C             | 2.955  | 3.867  | -20.051 | N | 4.141  | -2.953 | -15.326 |
| CU | 4.240  | -1.095 | -16.265 | C             | 2.016  | 2.044  | -21.251 | C | 3.098  | -3.775 | -15.429 |
| O  | 4.525  | -2.241 | -20.160 | H             | 1.207  | 1.409  | -21.596 | H | 2.250  | -3.631 | -16.079 |
| H  | 5.221  | -1.608 | -20.462 | C             | 4.234  | 3.459  | -20.385 | N | 3.257  | -4.833 | -14.617 |
|    |        |        |         | H             | 5.079  | 4.052  | -20.082 |   |        |        |         |

H 2.612 -5.636 -14.540  
C 4.464 -4.691 -13.965  
H 4.793 -5.419 -13.237  
CU 4.260 -1.115 -16.219  
O 4.460 -2.292 -20.117  
H 5.160 -1.654 -20.387  
H 4.922 -3.172 -20.179  
O 3.292 3.116 -26.287  
H 3.051 4.029 -26.039  
H 2.651 2.552 -25.830  
O 3.051 -1.542 -17.998  
H 3.573 -1.812 -18.807  
H 2.173 -1.265 -18.295  
O 2.471 -0.579 -15.260  
H 2.061 0.203 -15.668  
H 1.773 -1.258 -15.206  
C 12.639 -0.420 -20.514  
C 5.615 10.843 -20.531  
C -1.008 1.757 -24.261  
C -0.748 3.177 -20.738  
C -2.160 6.920 -15.543  
C 10.445 -1.674 -17.150  
C 7.586 3.912 -14.086  
C 7.266 -3.617 -13.172

110

2hNA

C 11.974 -0.639 -21.886  
H 12.222 -1.636 -22.243  
H 12.405 0.077 -22.587  
C 10.465 -0.561 -21.788  
C 9.732 0.629 -21.670  
H 10.239 1.588 -21.734  
C 8.358 0.592 -21.413  
H 7.789 1.510 -21.289  
C 7.705 -0.639 -21.282  
O 6.367 -0.688 -20.961  
H 5.912 0.066 -21.406  
C 8.402 -1.831 -21.451  
H 7.865 -2.775 -21.369  
C 9.771 -1.775 -21.696  
H 10.361 -2.678 -21.776  
C 4.731 9.919 -19.635  
H 3.678 10.211 -19.759  
H 5.019 10.046 -18.594  
C 4.808 8.421 -19.934  
O 4.671 7.580 -19.068  
O 4.940 8.077 -21.222  
H 4.839 7.105 -21.265  
C 0.010 0.584 -24.414  
H 0.224 0.430 -25.471  
H -0.431 -0.332 -24.021  
H 0.929 0.803 -23.855

C 0.552 3.868 -20.130  
H 0.455 3.872 -19.036  
H 0.554 4.927 -20.428  
C 1.842 3.204 -20.563  
C 3.014 3.901 -20.927  
C 1.870 1.811 -20.691  
H 1.003 1.228 -20.383  
C 4.114 3.221 -21.450  
H 5.004 3.773 -21.742  
C 2.903 1.105 -21.308  
C 4.042 1.851 -21.672  
O 3.181 5.267 -20.762  
H 2.325 5.667 -20.548  
N 2.699 -0.226 -21.646  
H 3.409 -0.918 -21.491  
H 1.743 -0.567 -21.693  
O 5.130 1.197 -22.253  
H 5.231 1.428 -23.188  
C -0.764 7.633 -15.626  
H -0.466 7.928 -14.610  
H -0.900 8.556 -16.191  
C 0.321 6.811 -16.273  
C 0.850 5.659 -15.675  
H 0.450 5.324 -14.721  
C 1.896 4.957 -16.266  
H 2.314 4.069 -15.796  
C 2.450 5.423 -17.461  
O 3.505 4.721 -17.996  
H 3.782 5.169 -18.819  
C 1.943 6.574 -18.071  
H 2.429 6.987 -18.948  
C 0.878 7.245 -17.477  
H 0.494 8.146 -17.951  
C 9.470 -1.131 -18.230  
H 9.775 -1.539 -19.196  
H 9.566 -0.047 -18.303  
C 8.052 -1.479 -17.930  
N 7.482 -2.711 -18.218  
H 7.935 -3.470 -18.729  
C 6.234 -2.738 -17.712  
H 5.552 -3.565 -17.803  
N 5.959 -1.572 -17.139  
C 7.080 -0.774 -17.273  
H 7.119 0.228 -16.877  
C 6.040 3.718 -14.071  
H 5.565 4.691 -14.231  
H 5.754 3.387 -13.068  
C 5.517 2.717 -15.062  
N 4.936 3.035 -16.282  
H 4.765 3.954 -16.704  
C 4.474 1.906 -16.862  
H 3.978 1.892 -17.821  
N 4.720 0.861 -16.074  
C 5.365 1.354 -14.953

H 5.657 0.706 -14.140  
C 6.291 -2.801 -14.026  
H 6.817 -2.471 -14.926  
H 6.012 -1.903 -13.458  
C 5.020 -3.524 -14.409  
N 4.136 -2.968 -15.335  
C 3.090 -3.787 -15.438  
H 2.247 -3.651 -16.097  
N 3.243 -4.834 -14.613  
H 2.601 -5.638 -14.530  
C 4.446 -4.690 -13.958  
H 4.769 -5.417 -13.228  
CU 4.267 -1.117 -16.204  
O 4.453 -2.312 -20.091  
H 5.200 -1.685 -20.271  
H 4.893 -3.203 -20.197  
O 3.002 -1.585 -17.954  
H 3.537 -1.843 -18.754  
H 2.172 -1.192 -18.285  
O 2.512 -0.577 -15.178  
H 2.098 0.221 -15.548  
H 1.815 -1.259 -15.138  
C 12.637 -0.419 -20.512  
C 5.615 10.838 -20.533  
C -1.002 1.755 -24.259  
C -0.725 3.213 -20.738  
C -2.132 6.924 -15.555  
C 10.452 -1.674 -17.147  
C 7.585 3.910 -14.089  
C 7.266 -3.617 -13.170

113

Ts(2hNA,3hNA)

C 11.965 -0.646 -21.879  
H 12.180 -1.662 -22.215  
H 12.413 0.042 -22.596  
C 10.461 -0.509 -21.786  
C 9.784 0.713 -21.665  
H 10.339 1.647 -21.710  
C 8.406 0.748 -21.434  
H 7.881 1.693 -21.314  
C 7.696 -0.448 -21.318  
O 6.367 -0.496 -20.990  
H 5.898 0.356 -21.038  
C 8.334 -1.673 -21.496  
H 7.751 -2.586 -21.423  
C 9.705 -1.684 -21.720  
H 10.240 -2.621 -21.800  
C 4.725 9.927 -19.645  
H 3.676 10.210 -19.785  
H 4.996 10.068 -18.601  
C 4.834 8.433 -19.936  
O 4.719 7.577 -19.081

|   |        |        |         |      |        |        |         |   |        |        |         |
|---|--------|--------|---------|------|--------|--------|---------|---|--------|--------|---------|
| O | 4.968  | 8.100  | -21.231 | N    | 4.975  | 2.985  | -16.250 | C | 8.220  | -1.515 | -21.506 |
| H | 4.966  | 7.127  | -21.262 | H    | 4.793  | 3.907  | -16.662 | H | 7.604  | -2.409 | -21.462 |
| C | -0.003 | 0.577  | -24.437 | C    | 4.508  | 1.857  | -16.821 | C | 9.597  | -1.594 | -21.711 |
| H | 0.221  | 0.454  | -25.495 | H    | 4.015  | 1.830  | -17.782 | H | 10.073 | -2.561 | -21.801 |
| H | -0.440 | -0.347 | -24.060 | N    | 4.744  | 0.818  | -16.024 | C | 4.722  | 9.930  | -19.656 |
| H | 0.911  | 0.791  | -23.869 | C    | 5.385  | 1.317  | -14.902 | H | 3.673  | 10.206 | -19.813 |
| C | 0.264  | 3.043  | -19.643 | H    | 5.672  | 0.673  | -14.084 | H | 4.975  | 10.080 | -18.609 |
| H | 0.164  | 2.209  | -18.942 | C    | 6.298  | -2.805 | -14.026 | C | 4.855  | 8.432  | -19.939 |
| H | 0.125  | 3.926  | -19.007 | H    | 6.825  | -2.471 | -14.924 | O | 4.754  | 7.595  | -19.060 |
| C | 1.611  | 3.064  | -20.252 | H    | 6.020  | -1.907 | -13.458 | O | 4.988  | 8.084  | -21.223 |
| C | 2.249  | 4.285  | -20.485 | C    | 5.029  | -3.533 | -14.407 | H | 5.053  | 7.100  | -21.256 |
| C | 2.221  | 1.876  | -20.627 | N    | 4.147  | -2.988 | -15.340 | C | -0.007 | 0.562  | -24.460 |
| H | 1.670  | 0.942  | -20.534 | C    | 3.105  | -3.811 | -15.434 | H | 0.225  | 0.452  | -25.515 |
| C | 3.565  | 4.321  | -20.928 | H    | 2.257  | -3.678 | -16.088 | H | -0.452 | -0.365 | -24.097 |
| H | 4.087  | 5.261  | -21.065 | N    | 3.261  | -4.853 | -14.603 | H | 0.903  | 0.763  | -23.882 |
| C | 3.492  | 1.904  | -21.168 | H    | 2.617  | -5.656 | -14.520 | C | 0.353  | 2.525  | -19.775 |
| C | 4.180  | 3.113  | -21.196 | C    | 4.464  | -4.701 | -13.948 | H | 0.535  | 1.443  | -19.765 |
| O | 1.655  | 5.464  | -20.212 | H    | 4.791  | -5.417 | -13.207 | H | 0.079  | 2.781  | -18.744 |
| H | 0.750  | 5.330  | -19.895 | CU   | 4.272  | -1.145 | -16.199 | C | 1.625  | 3.219  | -20.205 |
| N | 4.126  | 0.769  | -21.705 | O    | 4.466  | -2.260 | -20.134 | C | 1.733  | 4.623  | -20.169 |
| H | 4.824  | 1.062  | -22.386 | H    | 5.145  | -1.598 | -20.398 | C | 2.741  | 2.485  | -20.636 |
| H | 3.463  | 0.157  | -22.174 | H    | 4.943  | -3.130 | -20.190 | H | 2.678  | 1.399  | -20.666 |
| O | 5.497  | 3.039  | -21.590 | O    | 3.315  | 2.848  | -26.479 | C | 2.903  | 5.248  | -20.585 |
| H | 5.492  | 3.367  | -22.493 | H    | 3.033  | 3.724  | -26.157 | H | 2.980  | 6.325  | -20.577 |
| C | -0.788 | 7.632  | -15.579 | H    | 2.803  | 2.211  | -25.960 | C | 3.935  | 3.093  | -21.038 |
| H | -0.523 | 7.968  | -14.566 | O    | 3.072  | -1.463 | -18.008 | C | 3.979  | 4.494  | -21.007 |
| H | -0.924 | 8.535  | -16.177 | H    | 3.602  | -1.748 | -18.807 | O | 0.750  | 5.453  | -19.742 |
| C | 0.331  | 6.824  | -16.160 | H    | 2.226  | -1.121 | -18.328 | H | 0.141  | 4.994  | -19.141 |
| C | 0.825  | 5.669  | -15.547 | O    | 2.510  | -0.624 | -15.191 | N | 5.077  | 2.327  | -21.493 |
| H | 0.364  | 5.316  | -14.628 | H    | 2.140  | 0.216  | -15.508 | H | 4.980  | 2.068  | -22.477 |
| C | 1.899  | 4.970  | -16.092 | H    | 1.782  | -1.273 | -15.201 | H | 5.917  | 2.904  | -21.435 |
| H | 2.276  | 4.061  | -15.632 | C    | 12.635 | -0.419 | -20.515 | O | 5.128  | 5.182  | -21.337 |
| C | 2.509  | 5.466  | -17.241 | C    | 5.614  | 10.841 | -20.532 | H | 5.461  | 4.818  | -22.168 |
| O | 3.558  | 4.754  | -17.786 | C    | -1.008 | 1.739  | -24.267 | C | -0.796 | 7.660  | -15.547 |
| H | 3.847  | 5.225  | -18.586 | C    | -0.887 | 2.948  | -20.659 | H | -0.577 | 8.009  | -14.527 |
| C | 2.065  | 6.641  | -17.839 | C    | -2.134 | 6.895  | -15.528 | H | -0.910 | 8.550  | -16.167 |
| H | 2.572  | 7.026  | -18.709 | C    | 10.446 | -1.674 | -17.150 | C | 0.347  | 6.845  | -16.064 |
| C | 0.959  | 7.289  | -17.317 | C    | 7.586  | 3.910  | -14.083 | C | 0.804  | 5.678  | -15.440 |
| H | 0.598  | 8.194  | -17.801 | C    | 7.266  | -3.618 | -13.172 | H | 0.300  | 5.313  | -14.550 |
| C | 9.474  | -1.136 | -18.229 |      |        |        |         | C | 1.900  | 4.980  | -15.945 |
| H | 9.782  | -1.539 | -19.195 |      |        |        |         | H | 2.248  | 4.059  | -15.485 |
| H | 9.571  | -0.050 | -18.303 | 110  |        |        |         | C | 2.562  | 5.489  | -17.061 |
| C | 8.057  | -1.489 | -17.936 | 3hNA |        |        |         | O | 3.617  | 4.782  | -17.601 |
| N | 7.489  | -2.721 | -18.228 | C    | 11.930 | -0.655 | -21.866 | H | 3.893  | 5.262  | -18.402 |
| H | 7.939  | -3.482 | -18.740 | H    | 12.121 | -1.681 | -22.192 | C | 2.153  | 6.671  | -17.662 |
| C | 6.238  | -2.749 | -17.730 | H    | 12.386 | 0.009  | -22.602 | H | 2.710  | 7.069  | -18.496 |
| H | 5.559  | -3.579 | -17.821 | C    | 10.425 | -0.465 | -21.763 | C | 1.032  | 7.322  | -17.180 |
| N | 5.967  | -1.592 | -17.138 | C    | 9.800  | 0.784  | -21.641 | H | 0.690  | 8.229  | -17.672 |
| C | 7.087  | -0.794 | -17.266 | H    | 10.392 | 1.695  | -21.686 | C | 9.476  | -1.139 | -18.230 |
| H | 7.125  | 0.204  | -16.861 | C    | 8.422  | 0.883  | -21.430 | H | 9.785  | -1.539 | -19.196 |
| C | 6.050  | 3.700  | -14.052 | H    | 7.965  | 1.862  | -21.326 | H | 9.569  | -0.053 | -18.305 |
| H | 5.560  | 4.665  | -14.228 | C    | 7.624  | -0.263 | -21.339 | C | 8.060  | -1.498 | -17.939 |
| H | 5.770  | 3.383  | -13.044 | O    | 6.273  | -0.218 | -21.079 | N | 7.493  | -2.728 | -18.242 |
| C | 5.540  | 2.678  | -15.026 | H    | 5.904  | 0.704  | -21.047 | H | 7.944  | -3.487 | -18.757 |

|     |        |        |         |   |        |        |         |         |        |        |         |
|-----|--------|--------|---------|---|--------|--------|---------|---------|--------|--------|---------|
| C   | 6.243  | -2.763 | -17.743 | C | 8.441  | 0.695  | -21.462 | C       | 0.769  | 7.138  | -17.576 |
| H   | 5.566  | -3.593 | -17.846 | H | 7.919  | 1.635  | -21.330 | H       | 0.317  | 7.976  | -18.103 |
| N   | 5.971  | -1.611 | -17.140 | C | 7.712  | -0.503 | -21.400 | C       | 9.480  | -1.113 | -18.254 |
| C   | 7.090  | -0.811 | -17.262 | O | 6.373  | -0.517 | -21.160 | H       | 9.811  | -1.501 | -19.220 |
| H   | 7.129  | 0.183  | -16.846 | H | 6.025  | 0.419  | -21.212 | H       | 9.580  | -0.027 | -18.310 |
| C   | 6.057  | 3.685  | -14.039 | C | 8.371  | -1.721 | -21.577 | C       | 8.056  | -1.461 | -18.005 |
| H   | 5.554  | 4.640  | -14.228 | H | 7.798  | -2.642 | -21.534 | N       | 7.505  | -2.701 | -18.285 |
| H   | 5.787  | 3.380  | -13.025 | C | 9.748  | -1.719 | -21.775 | H       | 7.966  | -3.466 | -18.776 |
| C   | 5.556  | 2.642  | -14.993 | H | 10.297 | -2.648 | -21.864 | C       | 6.219  | -2.697 | -17.862 |
| N   | 5.006  | 2.939  | -16.224 | C | 4.693  | 9.918  | -19.653 | H       | 5.547  | -3.531 | -17.974 |
| H   | 4.809  | 3.865  | -16.625 | H | 3.647  | 10.221 | -19.763 | N       | 5.909  | -1.527 | -17.333 |
| C   | 4.538  | 1.810  | -16.788 | H | 4.982  | 10.050 | -18.610 | C       | 7.044  | -0.747 | -17.420 |
| H   | 4.046  | 1.776  | -17.749 | C | 4.759  | 8.413  | -19.938 | H       | 7.059  | 0.267  | -17.047 |
| N   | 4.765  | 0.778  | -15.979 | O | 4.511  | 7.583  | -19.087 | C       | 6.014  | 3.794  | -14.024 |
| C   | 5.398  | 1.282  | -14.856 | O | 5.017  | 8.048  | -21.206 | H       | 5.546  | 4.768  | -14.213 |
| H   | 5.677  | 0.642  | -14.033 | H | 5.025  | 7.068  | -21.202 | H       | 5.748  | 3.514  | -13.001 |
| C   | 6.302  | -2.808 | -14.028 | C | 0.062  | 0.598  | -24.450 | C       | 5.451  | 2.758  | -14.941 |
| H   | 6.830  | -2.473 | -14.924 | H | 0.224  | 0.465  | -25.518 | N       | 4.908  | 3.010  | -16.187 |
| H   | 6.020  | -1.910 | -13.460 | H | -0.359 | -0.329 | -24.061 | H       | 4.806  | 3.902  | -16.668 |
| C   | 5.036  | -3.542 | -14.408 | C | 1.412  | 0.943  | -23.813 | C       | 4.371  | 1.862  | -16.663 |
| N   | 4.154  | -3.009 | -15.346 | O | 2.114  | 1.887  | -24.206 | H       | 3.880  | 1.796  | -17.621 |
| C   | 3.114  | -3.834 | -15.431 | N | 1.793  | 0.143  | -22.803 | N       | 4.536  | 0.876  | -15.790 |
| H   | 2.261  | -3.709 | -16.080 | H | 1.145  | -0.535 | -22.402 | C       | 5.206  | 1.427  | -14.715 |
| N   | 3.274  | -4.870 | -14.593 | H | 2.639  | 0.377  | -22.297 | H       | 5.456  | 0.835  | -13.847 |
| H   | 2.633  | -5.674 | -14.508 | C | 0.479  | 3.771  | -19.978 | C       | 6.307  | -2.800 | -14.044 |
| C   | 4.477  | -4.708 | -13.939 | H | 0.328  | 3.644  | -18.900 | H       | 6.816  | -2.520 | -14.973 |
| H   | 4.808  | -5.416 | -13.193 | H | 0.485  | 4.846  | -20.176 | H       | 6.073  | -1.866 | -13.514 |
| CU  | 4.283  | -1.170 | -16.192 | C | 1.804  | 3.218  | -20.370 | C       | 5.005  | -3.500 | -14.350 |
| O   | 4.531  | -2.180 | -20.188 | C | 2.264  | 1.916  | -19.953 | N       | 4.040  | -2.856 | -15.117 |
| H   | 5.193  | -1.511 | -20.483 | C | 2.665  | 4.035  | -21.070 | C       | 3.007  | -3.681 | -15.214 |
| H   | 5.002  | -3.052 | -20.231 | H | 2.329  | 5.021  | -21.374 | H       | 2.095  | -3.483 | -15.754 |
| O   | 3.147  | -1.324 | -18.068 | C | 3.527  | 1.462  | -20.277 | N       | 3.245  | -4.824 | -14.541 |
| H   | 3.664  | -1.648 | -18.859 | H | 3.862  | 0.468  | -19.984 | H       | 2.615  | -5.635 | -14.494 |
| H   | 2.259  | -1.091 | -18.373 | C | 3.973  | 3.649  | -21.337 | C       | 4.503  | -4.726 | -13.984 |
| O   | 2.507  | -0.662 | -15.205 | C | 4.426  | 2.297  | -21.010 | H       | 4.904  | -5.518 | -13.368 |
| H   | 2.174  | 0.210  | -15.471 | O | 1.378  | 1.198  | -19.231 | CU      | 4.388  | -1.095 | -15.972 |
| H   | 1.754  | -1.279 | -15.257 | H | 1.741  | 0.322  | -19.018 | O       | 4.455  | -2.331 | -20.171 |
| C   | 12.630 | -0.420 | -20.518 | N | 4.875  | 4.523  | -21.862 | H       | 5.152  | -1.679 | -20.389 |
| C   | 5.615  | 10.843 | -20.534 | H | 5.757  | 4.098  | -22.152 | H       | 4.957  | -3.179 | -20.233 |
| C   | -1.007 | 1.727  | -24.285 | H | 4.524  | 5.166  | -22.565 | O       | 3.356  | 3.207  | -26.304 |
| C   | -0.873 | 2.785  | -20.675 | O | 5.570  | 1.941  | -21.412 | H       | 3.148  | 4.137  | -26.099 |
| C   | -2.137 | 6.920  | -15.544 | C | -0.762 | 7.631  | -15.645 | H       | 2.838  | 2.695  | -25.648 |
| C   | 10.450 | -1.674 | -17.150 | H | -0.446 | 7.930  | -14.637 | C       | 12.647 | -0.423 | -20.512 |
| C   | 7.590  | 3.911  | -14.084 | H | -0.901 | 8.550  | -16.219 | C       | 5.581  | 10.827 | -20.549 |
| C   | 7.268  | -3.618 | -13.172 | C | 0.307  | 6.797  | -16.302 | C       | -0.967 | 1.737  | -24.266 |
|     |        |        |         | C | 0.900  | 5.707  | -15.653 | C       | -0.729 | 3.149  | -20.691 |
| 110 |        |        |         | H | 0.552  | 5.422  | -14.663 | C       | -2.124 | 6.928  | -15.549 |
| I   |        |        |         | C | 1.940  | 4.993  | -16.242 | C       | 10.434 | -1.665 | -17.163 |
| C   | 12.002 | -0.663 | -21.884 | H | 2.406  | 4.155  | -15.733 | C       | 7.553  | 3.963  | -14.096 |
| H   | 12.231 | -1.679 | -22.208 | C | 2.407  | 5.381  | -17.498 | C       | 7.267  | -3.609 | -13.180 |
| H   | 12.462 | 0.021  | -22.599 | O | 3.464  | 4.685  | -18.042 |         |        |        |         |
| C   | 10.499 | -0.541 | -21.814 | H | 3.796  | 5.200  | -18.798 | 110     |        |        |         |
| C   | 9.818  | 0.673  | -21.671 | C | 1.810  | 6.441  | -18.179 | TS(1,2) |        |        |         |
| H   | 10.369 | 1.611  | -21.689 | H | 2.184  | 6.735  | -19.154 | C       | 12.007 | -0.659 | -21.884 |



|   |        |        |         |    |        |        |         |     |        |        |         |
|---|--------|--------|---------|----|--------|--------|---------|-----|--------|--------|---------|
| H | 12.259 | -1.666 | -22.220 | C  | 2.704  | 5.891  | -16.855 | C   | 7.268  | -3.611 | -13.184 |
| H | 12.443 | 0.044  | -22.593 | O  | 3.918  | 5.421  | -17.235 |     |        |        |         |
| C | 10.502 | -0.576 | -21.801 | H  | 4.263  | 6.047  | -17.902 |     |        |        |         |
| C | 9.800  | 0.627  | -21.678 | C  | 2.040  | 6.810  | -17.672 | 110 |        |        |         |
| H | 10.330 | 1.575  | -21.724 | H  | 2.541  | 7.217  | -18.539 | 2   |        |        |         |
| C | 8.428  | 0.628  | -21.445 | C  | 0.837  | 7.342  | -17.249 | C   | 12.005 | -0.636 | -21.888 |
| H | 7.890  | 1.559  | -21.322 | H  | 0.330  | 8.085  | -17.859 | H   | 12.290 | -1.622 | -22.256 |
| C | 7.724  | -0.581 | -21.343 | C  | 9.478  | -1.112 | -18.252 | H   | 12.406 | 0.102  | -22.581 |
| O | 6.382  | -0.599 | -21.076 | H  | 9.809  | -1.497 | -19.218 | C   | 10.499 | -0.624 | -21.784 |
| H | 6.074  | 0.340  | -21.036 | H  | 9.574  | -0.025 | -18.307 | C   | 9.716  | 0.534  | -21.691 |
| C | 8.401  | -1.792 | -21.499 | C  | 8.057  | -1.467 | -17.998 | H   | 10.184 | 1.512  | -21.780 |
| H | 7.855  | -2.726 | -21.406 | N  | 7.516  | -2.718 | -18.249 | C   | 8.349  | 0.447  | -21.429 |
| C | 9.777  | -1.767 | -21.715 | H  | 7.978  | -3.488 | -18.731 | H   | 7.739  | 1.342  | -21.342 |
| H | 10.351 | -2.685 | -21.762 | C  | 6.232  | -2.715 | -17.821 | C   | 7.741  | -0.806 | -21.259 |
| C | 4.714  | 9.919  | -19.639 | H  | 5.565  | -3.555 | -17.910 | O   | 6.430  | -0.938 | -20.915 |
| H | 3.663  | 10.192 | -19.777 | N  | 5.914  | -1.536 | -17.318 | H   | 5.956  | -0.095 | -21.152 |
| H | 4.988  | 10.076 | -18.597 | C  | 7.042  | -0.749 | -17.425 | C   | 8.499  | -1.968 | -21.401 |
| C | 4.844  | 8.423  | -19.911 | H  | 7.052  | 0.273  | -17.075 | H   | 8.010  | -2.927 | -21.275 |
| O | 4.803  | 7.602  | -19.017 | C  | 6.012  | 3.779  | -13.998 | C   | 9.863  | -1.860 | -21.648 |
| O | 4.908  | 8.065  | -21.198 | H  | 5.537  | 4.752  | -14.179 | H   | 10.494 | -2.742 | -21.675 |
| H | 4.854  | 7.089  | -21.226 | H  | 5.754  | 3.490  | -12.975 | C   | 4.715  | 9.902  | -19.647 |
| C | -0.238 | 0.434  | -24.585 | C  | 5.448  | 2.746  | -14.920 | H   | 3.667  | 10.206 | -19.743 |
| H | -0.245 | 0.278  | -25.654 | N  | 4.928  | 3.015  | -16.171 | H   | 5.017  | 10.018 | -18.605 |
| H | -0.770 | -0.406 | -24.138 | H  | 4.813  | 3.937  | -16.598 | C   | 4.772  | 8.405  | -19.965 |
| C | 1.205  | 0.430  | -24.209 | C  | 4.394  | 1.873  | -16.666 | O   | 4.588  | 7.560  | -19.110 |
| O | 1.987  | 1.383  | -24.383 | H  | 3.921  | 1.808  | -17.635 | O   | 4.921  | 8.078  | -21.256 |
| N | 1.593  | -0.784 | -23.790 | N  | 4.539  | 0.878  | -15.801 | H   | 4.791  | 7.109  | -21.323 |
| H | 0.900  | -1.371 | -23.328 | C  | 5.194  | 1.415  | -14.709 | C   | 0.018  | 0.558  | -24.491 |
| H | 2.538  | -0.935 | -23.461 | H  | 5.429  | 0.811  | -13.846 | H   | 0.125  | 0.403  | -25.564 |
| C | 0.542  | 3.934  | -20.152 | C  | 6.310  | -2.799 | -14.047 | H   | -0.416 | -0.352 | -24.076 |
| H | 0.404  | 4.033  | -19.065 | H  | 6.820  | -2.517 | -14.974 | C   | 1.409  | 0.843  | -23.947 |
| H | 0.531  | 4.954  | -20.561 | H  | 6.078  | -1.866 | -13.516 | O   | 2.082  | 1.827  | -24.280 |
| C | 1.892  | 3.347  | -20.450 | C  | 5.007  | -3.495 | -14.356 | N   | 1.884  | -0.113 | -23.131 |
| C | 3.053  | 4.206  | -20.313 | N  | 4.043  | -2.846 | -15.119 | H   | 1.247  | -0.771 | -22.684 |
| C | 2.113  | 2.074  | -20.923 | C  | 3.009  | -3.670 | -15.222 | H   | 2.804  | 0.016  | -22.736 |
| H | 1.308  | 1.365  | -21.096 | H  | 2.099  | -3.467 | -15.763 | C   | 0.575  | 3.904  | -20.179 |
| C | 4.345  | 3.801  | -20.546 | N  | 3.247  | -4.817 | -14.556 | H   | 0.450  | 4.028  | -19.097 |
| H | 5.170  | 4.493  | -20.445 | H  | 2.616  | -5.628 | -14.511 | H   | 0.580  | 4.920  | -20.594 |
| C | 3.401  | 1.701  | -21.304 | C  | 4.505  | -4.724 | -13.998 | C   | 1.877  | 3.200  | -20.464 |
| C | 4.591  | 2.491  | -21.026 | H  | 4.906  | -5.519 | -13.387 | C   | 3.026  | 3.897  | -20.999 |
| O | 2.880  | 5.513  | -20.001 | CU | 4.378  | -1.089 | -15.982 | C   | 2.009  | 1.850  | -20.201 |
| H | 2.069  | 5.628  | -19.476 | O  | 4.363  | -2.470 | -20.070 | H   | 1.178  | 1.304  | -19.758 |
| N | 3.588  | 0.682  | -22.169 | H  | 5.005  | -1.744 | -20.154 | C   | 4.144  | 3.237  | -21.429 |
| H | 4.574  | 0.590  | -22.409 | H  | 4.941  | -3.265 | -20.185 | H   | 4.967  | 3.773  | -21.889 |
| H | 3.033  | 0.830  | -23.013 | O  | 3.311  | 3.167  | -26.285 | C   | 3.163  | 1.146  | -20.566 |
| O | 5.714  | 2.005  | -21.338 | H  | 3.116  | 4.091  | -26.039 | C   | 4.246  | 1.826  | -21.295 |
| C | -0.864 | 7.748  | -15.532 | H  | 2.796  | 2.623  | -25.661 | O   | 3.060  | 5.265  | -21.058 |
| H | -0.674 | 8.133  | -14.519 | C  | 12.652 | -0.417 | -20.513 | H   | 2.199  | 5.604  | -20.776 |
| H | -1.023 | 8.612  | -16.177 | C  | 5.591  | 10.829 | -20.539 | N   | 3.271  | -0.181 | -20.355 |
| C | 0.314  | 6.991  | -16.013 | C  | -1.006 | 1.727  | -24.287 | H   | 4.043  | -0.726 | -20.708 |
| C | 0.971  | 6.046  | -15.218 | C  | -0.687 | 3.194  | -20.720 | H   | 2.591  | -0.691 | -19.811 |
| H | 0.561  | 5.793  | -14.242 | C  | -2.150 | 6.928  | -15.528 | O   | 5.213  | 1.163  | -21.770 |
| C | 2.163  | 5.473  | -15.640 | C  | 10.435 | -1.663 | -17.166 | C   | -0.768 | 7.645  | -15.635 |
| H | 2.712  | 4.769  | -15.023 | C  | 7.550  | 3.957  | -14.080 | H   | -0.445 | 7.929  | -14.624 |

|    |        |        |         |         |        |        |         |    |        |        |         |
|----|--------|--------|---------|---------|--------|--------|---------|----|--------|--------|---------|
| H  | -0.917 | 8.573  | -16.190 | C       | 5.591  | 10.823 | -20.540 | H  | 4.018  | -0.149 | -21.326 |
| C  | 0.296  | 6.832  | -16.320 | C       | -0.963 | 1.726  | -24.281 | H  | 4.985  | 0.956  | -22.240 |
| C  | 0.850  | 5.684  | -15.739 | C       | -0.681 | 3.191  | -20.725 | O  | 5.499  | 3.175  | -21.501 |
| H  | 0.469  | 5.335  | -14.782 | C       | -2.124 | 6.933  | -15.541 | C  | -0.807 | 7.657  | -15.582 |
| C  | 1.891  | 4.994  | -16.352 | C       | 10.435 | -1.663 | -17.166 | H  | -0.535 | 7.983  | -14.568 |
| H  | 2.324  | 4.108  | -15.898 | C       | 7.549  | 3.957  | -14.076 | H  | -0.965 | 8.562  | -16.171 |
| C  | 2.407  | 5.469  | -17.559 | C       | 7.270  | -3.610 | -13.189 | C  | 0.306  | 6.867  | -16.190 |
| O  | 3.466  | 4.799  | -18.120 |         |        |        |         | C  | 0.828  | 5.718  | -15.589 |
| H  | 3.822  | 5.356  | -18.837 | 110     |        |        |         | H  | 0.382  | 5.346  | -14.670 |
| C  | 1.847  | 6.589  | -18.174 | TS(2,3) |        |        |         | C  | 1.916  | 5.053  | -16.145 |
| H  | 2.278  | 6.976  | -19.089 | C       | 12.023 | -0.635 | -21.903 | H  | 2.324  | 4.154  | -15.694 |
| C  | 0.798  | 7.257  | -17.552 | H       | 12.246 | -1.650 | -22.234 | C  | 2.498  | 5.570  | -17.300 |
| H  | 0.379  | 8.143  | -18.024 | H       | 12.499 | 0.052  | -22.603 | O  | 3.574  | 4.916  | -17.842 |
| C  | 9.474  | -1.108 | -18.244 | C       | 10.521 | -0.503 | -21.843 | H  | 3.921  | 5.487  | -18.551 |
| H  | 9.802  | -1.488 | -19.211 | C       | 9.841  | 0.713  | -21.696 | C  | 1.992  | 6.714  | -17.915 |
| H  | 9.564  | -0.020 | -18.293 | H       | 10.385 | 1.652  | -21.754 | H  | 2.458  | 7.092  | -18.812 |
| C  | 8.057  | -1.471 | -17.980 | C       | 8.475  | 0.731  | -21.414 | C  | 0.887  | 7.340  | -17.366 |
| N  | 7.532  | -2.735 | -18.197 | H       | 7.940  | 1.668  | -21.283 | H  | 0.482  | 8.228  | -17.847 |
| H  | 7.996  | -3.503 | -18.680 | C       | 7.788  | -0.476 | -21.264 | C  | 9.476  | -1.116 | -18.250 |
| C  | 6.253  | -2.741 | -17.759 | O       | 6.490  | -0.526 | -20.843 | H  | 9.807  | -1.500 | -19.217 |
| H  | 5.596  | -3.591 | -17.827 | H       | 6.107  | 0.365  | -20.722 | H  | 9.569  | -0.028 | -18.304 |
| N  | 5.917  | -1.549 | -17.293 | C       | 8.418  | -1.693 | -21.512 | C  | 8.056  | -1.474 | -17.994 |
| C  | 7.034  | -0.751 | -17.423 | H       | 7.848  | -2.613 | -21.422 | N  | 7.514  | -2.724 | -18.255 |
| H  | 7.033  | 0.280  | -17.098 | C       | 9.778  | -1.686 | -21.795 | H  | 7.982  | -3.496 | -18.728 |
| C  | 6.010  | 3.785  | -14.006 | H       | 10.319 | -2.615 | -21.923 | C  | 6.230  | -2.723 | -17.828 |
| H  | 5.540  | 4.764  | -14.163 | C       | 4.714  | 9.897  | -19.659 | H  | 5.566  | -3.566 | -17.920 |
| H  | 5.748  | 3.473  | -12.992 | H       | 3.661  | 10.168 | -19.789 | N  | 5.910  | -1.547 | -17.321 |
| C  | 5.441  | 2.776  | -14.953 | H       | 4.986  | 10.028 | -18.612 | C  | 7.038  | -0.759 | -17.421 |
| N  | 4.902  | 3.052  | -16.198 | C       | 4.847  | 8.407  | -19.976 | H  | 7.046  | 0.261  | -17.065 |
| H  | 4.824  | 3.950  | -16.671 | O       | 4.752  | 7.542  | -19.128 | C  | 6.012  | 3.784  | -14.008 |
| C  | 4.357  | 1.914  | -16.696 | O       | 4.988  | 8.110  | -21.277 | H  | 5.538  | 4.758  | -14.181 |
| H  | 3.866  | 1.868  | -17.656 | H       | 5.051  | 7.139  | -21.352 | H  | 5.753  | 3.488  | -12.987 |
| N  | 4.509  | 0.914  | -15.836 | C       | -0.023 | 0.542  | -24.529 | C  | 5.447  | 2.757  | -14.935 |
| C  | 5.180  | 1.444  | -14.750 | H       | 0.078  | 0.399  | -25.601 | N  | 4.898  | 3.023  | -16.175 |
| H  | 5.415  | 0.838  | -13.888 | H       | -0.461 | -0.369 | -24.118 | H  | 4.780  | 3.925  | -16.640 |
| C  | 6.314  | -2.794 | -14.051 | C       | 1.368  | 0.813  | -23.986 | C  | 4.363  | 1.879  | -16.663 |
| H  | 6.825  | -2.509 | -14.976 | O       | 2.068  | 1.772  | -24.335 | H  | 3.864  | 1.820  | -17.619 |
| H  | 6.083  | -1.862 | -13.516 | N       | 1.819  | -0.124 | -23.135 | N  | 4.536  | 0.882  | -15.804 |
| C  | 5.009  | -3.486 | -14.362 | H       | 1.171  | -0.767 | -22.683 | C  | 5.209  | 1.423  | -14.725 |
| N  | 4.040  | -2.834 | -15.119 | H       | 2.722  | 0.048  | -22.719 | H  | 5.463  | 0.820  | -13.865 |
| C  | 3.008  | -3.660 | -15.222 | C       | 0.285  | 2.937  | -19.662 | C  | 6.309  | -2.800 | -14.045 |
| H  | 2.094  | -3.459 | -15.758 | H       | 0.190  | 2.036  | -19.046 | H  | 6.819  | -2.518 | -14.972 |
| N  | 3.249  | -4.810 | -14.562 | H       | 0.155  | 3.752  | -18.938 | H  | 6.076  | -1.867 | -13.514 |
| H  | 2.617  | -5.621 | -14.516 | C       | 1.636  | 2.971  | -20.270 | C  | 5.007  | -3.498 | -14.353 |
| C  | 4.508  | -4.717 | -14.008 | C       | 2.226  | 4.242  | -20.558 | N  | 4.042  | -2.854 | -15.119 |
| H  | 4.913  | -5.513 | -13.401 | C       | 2.332  | 1.802  | -20.542 | C  | 3.009  | -3.678 | -15.217 |
| CU | 4.365  | -1.065 | -15.981 | H       | 1.858  | 0.840  | -20.364 | H  | 2.096  | -3.479 | -15.756 |
| O  | 4.366  | -2.604 | -19.938 | C       | 3.500  | 4.359  | -21.036 | N  | 3.247  | -4.822 | -14.545 |
| H  | 5.083  | -1.976 | -19.739 | H       | 3.947  | 5.331  | -21.204 | H  | 2.617  | -5.633 | -14.498 |
| H  | 4.913  | -3.402 | -20.181 | C       | 3.599  | 1.882  | -21.093 | C  | 4.505  | -4.725 | -13.988 |
| O  | 3.360  | 3.205  | -26.337 | C       | 4.281  | 3.179  | -21.244 | H  | 4.907  | -5.517 | -13.372 |
| H  | 3.183  | 4.138  | -26.113 | O       | 1.529  | 5.361  | -20.278 | CU | 4.375  | -1.088 | -15.972 |
| H  | 2.856  | 2.699  | -25.668 | H       | 0.635  | 5.147  | -19.975 | O  | 4.469  | -2.329 | -20.183 |
| C  | 12.655 | -0.412 | -20.515 | N       | 4.343  | 0.799  | -21.471 | H  | 5.217  | -1.703 | -20.193 |

|     |        |        |         |   |        |        |         |     |        |        |         |
|-----|--------|--------|---------|---|--------|--------|---------|-----|--------|--------|---------|
| H   | 4.944  | -3.193 | -20.265 | C | 3.799  | 3.272  | -21.247 | C   | 4.503  | -4.732 | -13.971 |
| O   | 3.360  | 3.220  | -26.321 | C | 3.929  | 4.718  | -21.036 | H   | 4.903  | -5.518 | -13.346 |
| H   | 3.179  | 4.153  | -26.098 | O | 0.627  | 5.508  | -19.704 | CU  | 4.384  | -1.109 | -15.966 |
| H   | 2.835  | 2.711  | -25.671 | H | 0.065  | 5.004  | -19.092 | O   | 4.596  | -2.185 | -20.318 |
| C   | 12.651 | -0.417 | -20.518 | N | 4.844  | 2.610  | -21.887 | H   | 5.230  | -1.456 | -20.439 |
| C   | 5.588  | 10.829 | -20.540 | H | 4.518  | 2.028  | -22.658 | H   | 5.143  | -3.003 | -20.331 |
| C   | -0.991 | 1.718  | -24.300 | H | 5.536  | 3.285  | -22.223 | O   | 3.343  | 3.222  | -26.278 |
| C   | -0.894 | 2.948  | -20.657 | O | 5.022  | 5.296  | -21.279 | H   | 3.163  | 4.162  | -26.081 |
| C   | -2.137 | 6.900  | -15.519 | C | -0.832 | 7.689  | -15.548 | H   | 2.815  | 2.730  | -25.618 |
| C   | 10.436 | -1.665 | -17.166 | H | -0.610 | 8.037  | -14.528 | C   | 12.636 | -0.424 | -20.518 |
| C   | 7.550  | 3.960  | -14.086 | H | -0.970 | 8.579  | -16.164 | C   | 5.584  | 10.828 | -20.551 |
| C   | 7.267  | -3.611 | -13.182 | C | 0.310  | 6.900  | -16.084 | C   | -0.965 | 1.710  | -24.297 |
|     |        |        |         | C | 0.805  | 5.743  | -15.470 | C   | -0.916 | 2.781  | -20.702 |
| 110 |        |        |         | H | 0.313  | 5.355  | -14.583 | C   | -2.151 | 6.921  | -15.538 |
| 3   |        |        |         | C | 1.931  | 5.097  | -15.974 | C   | 10.433 | -1.666 | -17.163 |
| C   | 11.932 | -0.664 | -21.866 | H | 2.325  | 4.195  | -15.515 | C   | 7.553  | 3.962  | -14.095 |
| H   | 12.092 | -1.702 | -22.171 | C | 2.573  | 5.652  | -17.078 | C   | 7.267  | -3.610 | -13.179 |
| H   | 12.415 | -0.030 | -22.612 | O | 3.692  | 5.052  | -17.588 |     |        |        |         |
| C   | 10.434 | -0.413 | -21.781 | H | 4.057  | 5.690  | -18.232 | 110 |        |        |         |
| C   | 9.875  | 0.866  | -21.655 | C | 2.087  | 6.796  | -17.698 | 4   |        |        |         |
| H   | 10.514 | 1.745  | -21.674 | H | 2.616  | 7.213  | -18.538 | C   | 12.051 | -0.639 | -21.907 |
| C   | 8.502  | 1.038  | -21.476 | C | 0.948  | 7.399  | -17.213 | H   | 12.277 | -1.658 | -22.225 |
| H   | 8.095  | 2.036  | -21.352 | H | 0.561  | 8.288  | -17.705 | H   | 12.547 | 0.038  | -22.604 |
| C   | 7.641  | -0.062 | -21.435 | C | 9.475  | -1.121 | -18.252 | C   | 10.548 | -0.506 | -21.897 |
| O   | 6.285  | 0.058  | -21.248 | H | 9.809  | -1.506 | -19.218 | C   | 9.863  | 0.682  | -21.609 |
| H   | 6.001  | 0.998  | -21.206 | H | 9.569  | -0.033 | -18.311 | H   | 10.410 | 1.612  | -21.477 |
| C   | 8.172  | -1.346 | -21.583 | C | 8.052  | -1.477 | -18.005 | C   | 8.477  | 0.684  | -21.471 |
| H   | 7.506  | -2.203 | -21.540 | N | 7.504  | -2.719 | -18.292 | H   | 7.943  | 1.602  | -21.246 |
| C   | 9.548  | -1.499 | -21.752 | H | 7.972  | -3.490 | -18.764 | C   | 7.750  | -0.504 | -21.616 |
| H   | 9.967  | -2.495 | -21.834 | C | 6.216  | -2.717 | -17.871 | O   | 6.401  | -0.538 | -21.460 |
| C   | 4.703  | 9.908  | -19.664 | H | 5.547  | -3.554 | -17.985 | H   | 6.099  | 0.158  | -20.814 |
| H   | 3.651  | 10.172 | -19.817 | N | 5.902  | -1.550 | -17.341 | C   | 8.410  | -1.684 | -21.961 |
| H   | 4.956  | 10.071 | -18.617 | C | 7.035  | -0.767 | -17.423 | H   | 7.831  | -2.594 | -22.090 |
| C   | 4.847  | 8.402  | -19.927 | H | 7.048  | 0.246  | -17.046 | C   | 9.793  | -1.665 | -22.102 |
| O   | 4.733  | 7.603  | -19.010 | C | 6.016  | 3.781  | -14.008 | H   | 10.331 | -2.568 | -22.367 |
| O   | 4.988  | 8.024  | -21.188 | H | 5.538  | 4.749  | -14.199 | C   | 4.712  | 9.898  | -19.648 |
| H   | 5.031  | 7.017  | -21.215 | H | 5.761  | 3.501  | -12.983 | H   | 3.666  | 10.215 | -19.725 |
| C   | 0.056  | 0.564  | -24.491 | C | 5.457  | 2.736  | -14.917 | H   | 5.026  | 9.996  | -18.608 |
| H   | 0.224  | 0.448  | -25.560 | N | 4.898  | 2.996  | -16.152 | C   | 4.747  | 8.404  | -19.989 |
| H   | -0.379 | -0.367 | -24.125 | H | 4.752  | 3.906  | -16.597 | O   | 4.496  | 7.545  | -19.166 |
| C   | 1.423  | 0.849  | -23.854 | C | 4.369  | 1.847  | -16.633 | O   | 4.970  | 8.099  | -21.277 |
| O   | 2.148  | 1.800  | -24.182 | H | 3.864  | 1.779  | -17.584 | H   | 4.892  | 7.127  | -21.357 |
| N   | 1.822  | -0.064 | -22.949 | N | 4.558  | 0.852  | -15.774 | C   | 0.113  | 0.616  | -24.430 |
| H   | 1.167  | -0.744 | -22.565 | C | 5.234  | 1.399  | -14.700 | H   | 0.311  | 0.488  | -25.494 |
| H   | 2.731  | 0.026  | -22.515 | H | 5.504  | 0.799  | -13.843 | H   | -0.292 | -0.323 | -24.054 |
| C   | 0.332  | 2.570  | -19.820 | C | 6.305  | -2.803 | -14.043 | C   | 1.428  | 1.009  | -23.747 |
| H   | 0.561  | 1.499  | -19.814 | H | 6.812  | -2.523 | -14.972 | O   | 2.103  | 1.980  | -24.123 |
| H   | 0.064  | 2.813  | -18.784 | H | 6.069  | -1.871 | -13.513 | N   | 1.799  | 0.241  | -22.709 |
| C   | 1.559  | 3.318  | -20.271 | C | 5.005  | -3.508 | -14.346 | H   | 1.165  | -0.458 | -22.322 |
| C   | 1.650  | 4.752  | -20.168 | N | 4.042  | -2.871 | -15.119 | H   | 2.621  | 0.515  | -22.184 |
| C   | 2.642  | 2.626  | -20.816 | C | 3.008  | -3.696 | -15.212 | C   | 0.610  | 3.793  | -20.191 |
| H   | 2.564  | 1.549  | -20.926 | H | 2.097  | -3.501 | -15.754 | H   | 0.433  | 4.090  | -19.152 |
| C   | 2.787  | 5.410  | -20.550 | N | 3.245  | -4.833 | -14.529 | H   | 0.819  | 4.719  | -20.734 |
| H   | 2.867  | 6.479  | -20.434 | H | 2.616  | -5.644 | -14.483 | C   | 1.781  | 2.848  | -20.214 |

|   |        |        |         |         |        |        |         |   |        |        |         |
|---|--------|--------|---------|---------|--------|--------|---------|---|--------|--------|---------|
| C | 3.009  | 3.205  | -20.879 | N       | 4.042  | -2.846 | -15.127 | H | 2.651  | 0.358  | -22.263 |
| C | 1.722  | 1.649  | -19.515 | C       | 3.009  | -3.672 | -15.217 | C | 0.614  | 3.810  | -20.210 |
| H | 0.794  | 1.363  | -19.023 | H       | 2.091  | -3.474 | -15.747 | H | 0.369  | 4.397  | -19.319 |
| C | 4.140  | 2.436  | -20.748 | N       | 3.249  | -4.816 | -14.546 | H | 1.023  | 4.513  | -20.945 |
| H | 5.064  | 2.744  | -21.226 | H       | 2.619  | -5.627 | -14.494 | C | 1.567  | 2.724  | -19.815 |
| C | 2.843  | 0.812  | -19.398 | C       | 4.510  | -4.718 | -13.996 | C | 2.789  | 2.466  | -20.516 |
| C | 4.138  | 1.269  | -19.926 | H       | 4.914  | -5.509 | -13.381 | C | 1.188  | 1.887  | -18.773 |
| O | 3.126  | 4.382  | -21.571 | CU      | 4.368  | -1.066 | -15.995 | H | 0.265  | 2.100  | -18.244 |
| H | 2.312  | 4.561  | -22.070 | O       | 4.517  | -2.330 | -20.197 | C | 3.582  | 1.404  | -20.150 |
| N | 2.837  | -0.375 | -18.745 | H       | 5.195  | -1.693 | -20.500 | H | 4.509  | 1.244  | -20.683 |
| H | 3.626  | -1.012 | -18.877 | H       | 5.017  | -3.184 | -20.219 | C | 1.918  | 0.751  | -18.437 |
| H | 1.957  | -0.769 | -18.440 | O       | 3.340  | 3.209  | -26.312 | C | 3.213  | 0.508  | -19.089 |
| O | 5.178  | 0.621  | -19.612 | H       | 3.179  | 4.151  | -26.111 | O | 3.239  | 3.289  | -21.509 |
| C | -0.758 | 7.636  | -15.652 | H       | 2.846  | 2.730  | -25.615 | H | 2.508  | 3.586  | -22.077 |
| H | -0.429 | 7.929  | -14.646 | C       | 12.657 | -0.413 | -20.515 | N | 1.532  | -0.114 | -17.469 |
| H | -0.904 | 8.559  | -16.218 | C       | 5.589  | 10.823 | -20.539 | H | 2.067  | -0.968 | -17.377 |
| C | 0.300  | 6.805  | -16.331 | C       | -0.954 | 1.725  | -24.278 | H | 0.582  | -0.108 | -17.124 |
| C | 0.899  | 5.709  | -15.698 | C       | -0.689 | 3.180  | -20.732 | O | 3.953  | -0.407 | -18.654 |
| H | 0.564  | 5.418  | -14.705 | C       | -2.120 | 6.933  | -15.543 | C | -0.758 | 7.635  | -15.646 |
| C | 1.925  | 4.994  | -16.307 | C       | 10.429 | -1.662 | -17.174 | H | -0.428 | 7.916  | -14.638 |
| H | 2.392  | 4.150  | -15.809 | C       | 7.553  | 3.959  | -14.073 | H | -0.905 | 8.564  | -16.201 |
| C | 2.377  | 5.386  | -17.568 | C       | 7.270  | -3.610 | -13.190 | C | 0.298  | 6.814  | -16.337 |
| O | 3.421  | 4.687  | -18.131 |         |        |        |         | C | 0.887  | 5.698  | -15.731 |
| H | 3.759  | 5.207  | -18.881 | 107     |        |        |         | H | 0.543  | 5.383  | -14.750 |
| C | 1.771  | 6.450  | -18.236 | TS(4,5) |        |        |         | C | 1.917  | 4.998  | -16.351 |
| H | 2.125  | 6.738  | -19.220 | C       | 12.015 | -0.639 | -21.897 | H | 2.377  | 4.138  | -15.878 |
| C | 0.743  | 7.149  | -17.612 | H       | 12.218 | -1.664 | -22.216 | C | 2.381  | 5.426  | -17.593 |
| H | 0.284  | 7.989  | -18.129 | H       | 12.508 | 0.026  | -22.607 | O | 3.433  | 4.752  | -18.168 |
| C | 9.472  | -1.121 | -18.269 | C       | 10.513 | -0.461 | -21.858 | H | 3.800  | 5.325  | -18.854 |
| H | 9.804  | -1.511 | -19.236 | C       | 9.881  | 0.769  | -21.633 | C | 1.781  | 6.508  | -18.236 |
| H | 9.567  | -0.034 | -18.331 | H       | 10.465 | 1.682  | -21.570 | H | 2.146  | 6.825  | -19.206 |
| C | 8.047  | -1.475 | -18.015 | C       | 8.499  | 0.834  | -21.465 | C | 0.750  | 7.192  | -17.603 |
| N | 7.508  | -2.726 | -18.277 | H       | 8.015  | 1.791  | -21.291 | H | 0.296  | 8.046  | -18.099 |
| H | 7.970  | -3.491 | -18.767 | C       | 7.725  | -0.328 | -21.517 | C | 9.507  | -1.115 | -18.286 |
| C | 6.231  | -2.734 | -17.829 | O       | 6.368  | -0.305 | -21.293 | H | 9.853  | -1.505 | -19.246 |
| H | 5.571  | -3.580 | -17.919 | H       | 6.142  | 0.538  | -20.876 | H | 9.605  | -0.028 | -18.342 |
| N | 5.914  | -1.564 | -17.307 | C       | 8.323  | -1.553 | -21.800 | C | 8.087  | -1.468 | -18.043 |
| C | 7.035  | -0.768 | -17.422 | H       | 7.707  | -2.446 | -21.854 | N | 7.533  | -2.704 | -18.333 |
| H | 7.034  | 0.255  | -17.078 | C       | 9.704  | -1.597 | -21.969 | H | 7.980  | -3.464 | -18.843 |
| C | 6.017  | 3.791  | -13.971 | H       | 10.200 | -2.538 | -22.173 | C | 6.280  | -2.732 | -17.816 |
| H | 5.545  | 4.767  | -14.142 | C       | 4.709  | 9.907  | -19.647 | H | 5.593  | -3.552 | -17.940 |
| H | 5.770  | 3.501  | -12.946 | H       | 3.663  | 10.215 | -19.742 | N | 6.009  | -1.592 | -17.217 |
| C | 5.440  | 2.764  | -14.883 | H       | 5.010  | 10.015 | -18.604 | C | 7.112  | -0.788 | -17.366 |
| N | 4.847  | 3.039  | -16.101 | C       | 4.773  | 8.414  | -19.977 | H | 7.132  | 0.221  | -16.979 |
| H | 4.767  | 3.932  | -16.581 | O       | 4.565  | 7.551  | -19.150 | C | 6.023  | 3.791  | -13.946 |
| C | 4.297  | 1.900  | -16.578 | O       | 4.985  | 8.113  | -21.269 | H | 5.550  | 4.770  | -14.093 |
| H | 3.754  | 1.860  | -17.503 | H       | 4.974  | 7.139  | -21.338 | H | 5.788  | 3.478  | -12.926 |
| N | 4.502  | 0.896  | -15.736 | C       | 0.096  | 0.604  | -24.444 | C | 5.448  | 2.788  | -14.876 |
| C | 5.211  | 1.428  | -14.675 | H       | 0.285  | 0.482  | -25.511 | N | 4.934  | 3.095  | -16.118 |
| H | 5.496  | 0.820  | -13.829 | H       | -0.320 | -0.334 | -24.074 | H | 4.889  | 4.003  | -16.567 |
| C | 6.315  | -2.797 | -14.056 | C       | 1.424  | 0.975  | -23.775 | C | 4.411  | 1.969  | -16.653 |
| H | 6.826  | -2.518 | -14.983 | O       | 2.078  | 1.970  | -24.124 | H | 3.945  | 1.967  | -17.619 |
| H | 6.084  | -1.862 | -13.527 | N       | 1.821  | 0.137  | -22.800 | N | 4.550  | 0.947  | -15.822 |
| C | 5.011  | -3.491 | -14.364 | H       | 1.183  | -0.572 | -22.439 | C | 5.198  | 1.451  | -14.711 |

|     |        |        |         |   |        |        |         |     |        |        |         |
|-----|--------|--------|---------|---|--------|--------|---------|-----|--------|--------|---------|
| H   | 5.443  | 0.818  | -13.871 | N | 1.842  | 0.024  | -22.850 | N   | 4.533  | 0.989  | -15.952 |
| C   | 6.315  | -2.785 | -14.055 | H | 1.197  | -0.686 | -22.502 | C   | 5.197  | 1.456  | -14.836 |
| H   | 6.829  | -2.503 | -14.978 | H | 2.640  | 0.268  | -22.272 | H   | 5.429  | 0.801  | -14.010 |
| H   | 6.089  | -1.850 | -13.523 | C | 0.714  | 3.603  | -20.190 | C   | 6.324  | -2.773 | -14.072 |
| C   | 5.005  | -3.465 | -14.379 | H | 0.552  | 4.425  | -19.486 | H   | 6.854  | -2.486 | -14.986 |
| N   | 4.042  | -2.816 | -15.152 | H | 1.326  | 4.016  | -21.004 | H   | 6.096  | -1.841 | -13.537 |
| C   | 3.017  | -3.650 | -15.260 | C | 1.388  | 2.460  | -19.443 | C   | 5.012  | -3.445 | -14.414 |
| H   | 2.110  | -3.461 | -15.811 | C | 2.428  | 1.615  | -19.953 | N   | 4.066  | -2.794 | -15.203 |
| N   | 3.249  | -4.797 | -14.589 | C | 0.846  | 2.123  | -18.210 | C   | 3.033  | -3.613 | -15.320 |
| H   | 2.623  | -5.611 | -14.546 | H | 0.085  | 2.771  | -17.790 | H   | 2.148  | -3.401 | -15.899 |
| C   | 4.502  | -4.695 | -14.022 | C | 2.805  | 0.458  | -19.293 | N   | 3.243  | -4.760 | -14.639 |
| H   | 4.904  | -5.487 | -13.407 | H | 3.579  | -0.189 | -19.693 | H   | 2.607  | -5.567 | -14.587 |
| CU  | 4.376  | -1.039 | -16.109 | C | 1.160  | 0.935  | -17.541 | C   | 4.493  | -4.668 | -14.057 |
| O   | 4.517  | -2.426 | -20.242 | C | 2.172  | 0.051  | -18.082 | H   | 4.874  | -5.463 | -13.434 |
| H   | 5.113  | -1.661 | -20.251 | O | 3.146  | 1.913  | -21.096 | CU  | 4.171  | -1.027 | -16.336 |
| H   | 5.114  | -3.212 | -20.334 | H | 2.649  | 2.473  | -21.718 | O   | 4.638  | -2.230 | -20.330 |
| C   | 12.652 | -0.414 | -20.516 | N | 0.519  | 0.566  | -16.394 | H   | 5.301  | -1.542 | -20.516 |
| C   | 5.591  | 10.827 | -20.535 | H | 0.666  | -0.405 | -16.129 | H   | 5.149  | -3.074 | -20.316 |
| C   | -0.956 | 1.725  | -24.279 | H | -0.445 | 0.884  | -16.340 | O   | 3.279  | 3.260  | -26.202 |
| C   | -0.689 | 3.199  | -20.742 | O | 2.452  | -1.034 | -17.448 | H   | 3.105  | 4.211  | -26.059 |
| C   | -2.120 | 6.933  | -15.543 | C | -0.761 | 7.640  | -15.658 | H   | 2.809  | 2.817  | -25.465 |
| C   | 10.440 | -1.662 | -17.174 | H | -0.413 | 7.902  | -14.649 | C   | 12.647 | -0.413 | -20.517 |
| C   | 7.556  | 3.959  | -14.068 | H | -0.917 | 8.580  | -16.190 | C   | 5.592  | 10.821 | -20.538 |
| C   | 7.266  | -3.608 | -13.190 | C | 0.285  | 6.834  | -16.386 | C   | -0.952 | 1.724  | -24.279 |
|     |        |        |         | C | 0.862  | 5.683  | -15.834 | C   | -0.664 | 3.168  | -20.735 |
| 110 |        |        |         | H | 0.517  | 5.321  | -14.867 | C   | -2.119 | 6.934  | -15.545 |
| 5   |        |        |         | C | 1.887  | 5.005  | -16.485 | C   | 10.437 | -1.664 | -17.168 |
| C   | 11.955 | -0.644 | -21.871 | H | 2.337  | 4.119  | -16.052 | C   | 7.552  | 3.956  | -14.073 |
| H   | 12.128 | -1.677 | -22.186 | C | 2.360  | 5.490  | -17.706 | C   | 7.263  | -3.603 | -13.197 |
| H   | 12.439 | 0.001  | -22.606 | O | 3.418  | 4.849  | -18.305 |     |        |        |         |
| C   | 10.454 | -0.415 | -21.793 | H | 3.834  | 5.497  | -18.902 | 103 |        |        |         |
| C   | 9.871  | 0.850  | -21.635 | C | 1.758  | 6.598  | -18.303 | 1NA |        |        |         |
| H   | 10.491 | 1.742  | -21.625 | H | 2.116  | 6.950  | -19.265 | C   | 12.005 | -0.661 | -21.889 |
| C   | 8.493  | 0.986  | -21.461 | C | 0.734  | 7.263  | -17.638 | H   | 12.234 | -1.677 | -22.215 |
| H   | 8.061  | 1.973  | -21.321 | H | 0.286  | 8.141  | -18.097 | H   | 12.467 | 0.025  | -22.601 |
| C   | 7.659  | -0.135 | -21.462 | C | 9.497  | -1.116 | -18.269 | C   | 10.503 | -0.539 | -21.820 |
| O   | 6.298  | -0.059 | -21.286 | H | 9.835  | -1.511 | -19.229 | C   | 9.823  | 0.675  | -21.678 |
| H   | 6.004  | 0.857  | -21.159 | H | 9.601  | -0.030 | -18.330 | H   | 10.375 | 1.612  | -21.696 |
| C   | 8.214  | -1.401 | -21.651 | C | 8.073  | -1.457 | -18.024 | C   | 8.446  | 0.697  | -21.469 |
| H   | 7.565  | -2.273 | -21.647 | N | 7.511  | -2.696 | -18.298 | H   | 7.925  | 1.638  | -21.336 |
| C   | 9.593  | -1.519 | -21.811 | H | 7.964  | -3.475 | -18.773 | C   | 7.717  | -0.500 | -21.408 |
| H   | 10.038 | -2.499 | -21.929 | C | 6.230  | -2.679 | -17.857 | O   | 6.376  | -0.514 | -21.172 |
| C   | 4.716  | 9.895  | -19.650 | H | 5.543  | -3.503 | -17.959 | H   | 6.027  | 0.416  | -21.250 |
| H   | 3.668  | 10.204 | -19.734 | N | 5.939  | -1.508 | -17.327 | C   | 8.375  | -1.719 | -21.584 |
| H   | 5.022  | 9.993  | -18.608 | C | 7.073  | -0.735 | -17.428 | H   | 7.801  | -2.639 | -21.541 |
| C   | 4.776  | 8.405  | -19.997 | H | 7.099  | 0.279  | -17.054 | C   | 9.752  | -1.717 | -21.781 |
| O   | 4.555  | 7.534  | -19.180 | C | 6.018  | 3.769  | -13.975 | H   | 10.301 | -2.646 | -21.872 |
| O   | 4.978  | 8.119  | -21.293 | H | 5.535  | 4.750  | -14.080 | C   | 4.689  | 9.926  | -19.652 |
| H   | 4.933  | 7.148  | -21.381 | H | 5.781  | 3.413  | -12.969 | H   | 3.643  | 10.227 | -19.769 |
| C   | 0.104  | 0.607  | -24.442 | C | 5.448  | 2.800  | -14.957 | H   | 4.972  | 10.069 | -18.610 |
| H   | 0.321  | 0.506  | -25.506 | N | 4.914  | 3.147  | -16.185 | C   | 4.761  | 8.420  | -19.919 |
| H   | -0.319 | -0.337 | -24.101 | H | 4.856  | 4.066  | -16.611 | O   | 4.506  | 7.600  | -19.060 |
| C   | 1.413  | 0.945  | -23.723 | C | 4.379  | 2.036  | -16.749 | O   | 5.034  | 8.037  | -21.179 |
| O   | 2.048  | 1.996  | -23.942 | H | 3.896  | 2.040  | -17.712 | H   | 5.070  | 7.057  | -21.147 |

|   |        |        |         |             |        |        |         |   |        |        |         |
|---|--------|--------|---------|-------------|--------|--------|---------|---|--------|--------|---------|
| C | 0.062  | 0.606  | -24.413 | H           | 3.913  | 1.785  | -17.648 | H | -0.336 | -0.335 | -24.035 |
| H | 0.295  | 0.478  | -25.469 | N           | 4.535  | 0.877  | -15.800 | H | 0.974  | 0.835  | -23.875 |
| H | -0.353 | -0.324 | -24.027 | C           | 5.194  | 1.430  | -14.719 | C | 0.538  | 3.853  | -20.273 |
| H | 0.966  | 0.846  | -23.842 | H           | 5.428  | 0.841  | -13.844 | H | 0.420  | 3.979  | -19.193 |
| C | 0.489  | 3.771  | -19.995 | C           | 6.307  | -2.799 | -14.044 | H | 0.572  | 4.862  | -20.713 |
| H | 0.359  | 3.629  | -18.916 | H           | 6.814  | -2.521 | -14.973 | C | 1.828  | 3.162  | -20.614 |
| H | 0.490  | 4.849  | -20.176 | H           | 6.075  | -1.864 | -13.515 | C | 2.919  | 3.593  | -19.813 |
| C | 1.809  | 3.222  | -20.416 | C           | 5.004  | -3.499 | -14.347 | C | 2.160  | 2.309  | -21.653 |
| C | 2.210  | 1.855  | -20.165 | N           | 4.038  | -2.854 | -15.112 | H | 1.466  | 1.867  | -22.347 |
| C | 2.714  | 4.086  | -21.001 | C           | 3.006  | -3.679 | -15.214 | C | 4.210  | 3.201  | -19.997 |
| H | 2.418  | 5.114  | -21.189 | H           | 2.095  | -3.482 | -15.755 | H | 4.863  | 3.606  | -19.261 |
| C | 3.467  | 1.407  | -20.509 | N           | 3.245  | -4.824 | -14.543 | C | 3.481  | 1.958  | -21.926 |
| H | 3.751  | 0.368  | -20.356 | H           | 2.616  | -5.637 | -14.501 | C | 4.577  | 2.325  | -21.040 |
| C | 4.014  | 3.691  | -21.290 | C           | 4.503  | -4.727 | -13.985 | O | 2.724  | 4.425  | -18.784 |
| C | 4.420  | 2.297  | -21.093 | H           | 4.905  | -5.520 | -13.371 | H | 1.803  | 4.702  | -18.683 |
| O | 1.280  | 1.075  | -19.580 | CU          | 4.383  | -1.094 | -15.976 | N | 3.838  | 1.327  | -23.060 |
| H | 1.551  | 0.142  | -19.597 | O           | 4.465  | -2.339 | -20.158 | H | 4.811  | 1.043  | -23.133 |
| N | 4.951  | 4.587  | -21.727 | H           | 5.160  | -1.682 | -20.363 | H | 3.147  | 0.874  | -23.640 |
| H | 5.826  | 4.154  | -22.026 | H           | 4.966  | -3.187 | -20.243 | O | 5.716  | 1.840  | -21.281 |
| H | 4.630  | 5.264  | -22.413 | C           | 12.646 | -0.424 | -20.515 | C | -0.873 | 7.760  | -15.550 |
| O | 5.576  | 1.955  | -21.473 | C           | 5.579  | 10.828 | -20.551 | H | -0.695 | 8.177  | -14.548 |
| C | -0.762 | 7.629  | -15.638 | C           | -0.976 | 1.742  | -24.261 | H | -1.030 | 8.603  | -16.222 |
| H | -0.451 | 7.927  | -14.628 | C           | -0.728 | 3.153  | -20.692 | C | 0.318  | 6.994  | -15.982 |
| H | -0.898 | 8.549  | -16.210 | C           | -2.125 | 6.928  | -15.550 | C | 0.995  | 6.145  | -15.104 |
| C | 0.308  | 6.795  | -16.292 | C           | 10.434 | -1.667 | -17.164 | H | 0.570  | 5.943  | -14.123 |
| C | 0.895  | 5.700  | -15.647 | C           | 7.554  | 3.963  | -14.098 | C | 2.226  | 5.611  | -15.453 |
| H | 0.539  | 5.409  | -14.661 | C           | 7.267  | -3.608 | -13.180 | H | 2.793  | 4.973  | -14.782 |
| C | 1.937  | 4.989  | -16.234 |             |        |        |         | C | 2.782  | 5.971  | -16.676 |
| H | 2.398  | 4.145  | -15.731 | 103         |        |        |         | O | 4.055  | 5.581  | -16.936 |
| C | 2.414  | 5.388  | -17.483 | TS(1NA,2NA) |        |        |         | H | 4.342  | 6.092  | -17.714 |
| O | 3.475  | 4.700  | -18.025 | C           | 12.010 | -0.651 | -21.888 | C | 2.059  | 6.718  | -17.615 |
| H | 3.808  | 5.219  | -18.777 | H           | 12.273 | -1.650 | -22.235 | H | 2.491  | 6.938  | -18.582 |
| C | 1.822  | 6.453  | -18.161 | H           | 12.437 | 0.066  | -22.589 | C | 0.826  | 7.229  | -17.256 |
| H | 2.206  | 6.755  | -19.128 | C           | 10.506 | -0.591 | -21.800 | H | 0.270  | 7.857  | -17.948 |
| C | 0.777  | 7.146  | -17.561 | C           | 9.779  | 0.596  | -21.671 | C | 9.480  | -1.112 | -18.251 |
| H | 0.327  | 7.987  | -18.084 | H           | 10.288 | 1.556  | -21.719 | H | 9.810  | -1.496 | -19.218 |
| C | 9.478  | -1.119 | -18.255 | C           | 8.407  | 0.565  | -21.435 | H | 9.576  | -0.025 | -18.305 |
| H | 9.806  | -1.512 | -19.219 | H           | 7.853  | 1.484  | -21.300 | C | 8.060  | -1.467 | -17.996 |
| H | 9.581  | -0.032 | -18.318 | C           | 7.731  | -0.660 | -21.341 | N | 7.519  | -2.717 | -18.254 |
| C | 8.055  | -1.465 | -18.000 | O           | 6.387  | -0.725 | -21.095 | H | 7.979  | -3.479 | -18.750 |
| N | 7.502  | -2.703 | -18.286 | H           | 6.034  | 0.196  | -21.097 | C | 6.237  | -2.720 | -17.823 |
| H | 7.961  | -3.463 | -18.786 | C           | 8.436  | -1.855 | -21.493 | H | 5.567  | -3.555 | -17.927 |
| C | 6.221  | -2.703 | -17.853 | H           | 7.908  | -2.799 | -21.402 | N | 5.920  | -1.545 | -17.310 |
| H | 5.547  | -3.534 | -17.969 | C           | 9.810  | -1.799 | -21.711 | C | 7.046  | -0.755 | -17.414 |
| N | 5.915  | -1.538 | -17.310 | H           | 10.404 | -2.703 | -21.764 | H | 7.054  | 0.265  | -17.058 |
| C | 7.049  | -0.756 | -17.400 | C           | 4.704  | 9.921  | -19.639 | C | 6.013  | 3.774  | -14.006 |
| H | 7.068  | 0.254  | -17.019 | H           | 3.657  | 10.224 | -19.744 | H | 5.536  | 4.745  | -14.181 |
| C | 6.014  | 3.791  | -14.027 | H           | 5.001  | 10.050 | -18.598 | H | 5.757  | 3.473  | -12.986 |
| H | 5.544  | 4.765  | -14.209 | C           | 4.777  | 8.426  | -19.938 | C | 5.450  | 2.744  | -14.934 |
| H | 5.750  | 3.503  | -13.006 | O           | 4.595  | 7.584  | -19.079 | N | 4.896  | 3.021  | -16.169 |
| C | 5.452  | 2.757  | -14.948 | O           | 4.961  | 8.086  | -21.219 | H | 4.757  | 3.954  | -16.568 |
| N | 4.926  | 3.006  | -16.203 | H           | 4.933  | 7.110  | -21.261 | C | 4.351  | 1.883  | -16.659 |
| H | 4.826  | 3.897  | -16.684 | C           | 0.068  | 0.593  | -24.435 | H | 3.857  | 1.824  | -17.616 |
| C | 4.388  | 1.857  | -16.681 | H           | 0.295  | 0.466  | -25.491 | N | 4.526  | 0.880  | -15.807 |

C 5.208 1.410 -14.729  
H 5.465 0.799 -13.877  
C 6.311 -2.798 -14.049  
H 6.822 -2.519 -14.976  
H 6.081 -1.863 -13.520  
C 5.007 -3.494 -14.356  
N 4.041 -2.844 -15.117  
C 3.009 -3.668 -15.221  
H 2.098 -3.466 -15.763  
N 3.247 -4.817 -14.557  
H 2.617 -5.628 -14.514  
C 4.506 -4.723 -14.000  
H 4.909 -5.519 -13.391  
CU 4.376 -1.090 -15.998  
O 4.375 -2.487 -20.046  
H 5.045 -1.783 -20.105  
H 4.933 -3.291 -20.196  
C 12.652 -0.418 -20.513  
C 5.587 10.828 -20.538  
C -0.968 1.731 -24.273  
C -0.724 3.164 -20.743  
C -2.153 6.929 -15.532  
C 10.437 -1.664 -17.166  
C 7.551 3.958 -14.083  
C 7.267 -3.610 -13.183

103

2NA

C 12.008 -0.639 -21.888  
H 12.288 -1.628 -22.251  
H 12.414 0.095 -22.583  
C 10.503 -0.615 -21.786  
C 9.735 0.550 -21.669  
H 10.214 1.524 -21.743  
C 8.368 0.474 -21.404  
H 7.770 1.374 -21.303  
C 7.745 -0.774 -21.257  
O 6.428 -0.887 -20.917  
H 5.977 -0.042 -21.185  
C 8.487 -1.943 -21.420  
H 7.986 -2.899 -21.311  
C 9.851 -1.846 -21.671  
H 10.474 -2.732 -21.725  
C 4.712 9.905 -19.642  
H 3.666 10.219 -19.728  
H 5.022 10.016 -18.602  
C 4.746 8.405 -19.958  
O 4.525 7.567 -19.107  
O 4.920 8.069 -21.246  
H 4.782 7.101 -21.303  
C 0.109 0.619 -24.405  
H 0.358 0.490 -25.458  
H -0.286 -0.318 -24.018  
H 0.999 0.890 -23.824

C 0.624 3.841 -20.215  
H 0.574 3.880 -19.120  
H 0.642 4.886 -20.538  
C 1.892 3.138 -20.643  
C 3.041 3.861 -21.133  
C 1.994 1.760 -20.575  
H 1.154 1.171 -20.212  
C 4.194 3.245 -21.529  
H 5.031 3.823 -21.904  
C 3.146 1.080 -21.006  
C 4.312 1.826 -21.500  
O 3.029 5.247 -21.196  
H 2.287 5.482 -21.772  
N 3.203 -0.259 -20.997  
H 4.027 -0.760 -21.296  
H 2.445 -0.813 -20.625  
O 5.348 1.226 -21.904  
C -0.761 7.642 -15.642  
H -0.436 7.926 -14.632  
H -0.910 8.568 -16.199  
C 0.301 6.823 -16.328  
C 0.903 5.720 -15.712  
H 0.569 5.413 -14.724  
C 1.933 5.019 -16.333  
H 2.404 4.169 -15.849  
C 2.383 5.434 -17.588  
O 3.428 4.753 -18.166  
H 3.759 5.303 -18.900  
C 1.773 6.508 -18.237  
H 2.128 6.808 -19.216  
C 0.743 7.191 -17.603  
H 0.280 8.038 -18.106  
C 9.476 -1.107 -18.246  
H 9.804 -1.489 -19.213  
H 9.570 -0.020 -18.298  
C 8.058 -1.467 -17.987  
N 7.526 -2.724 -18.225  
H 7.989 -3.487 -18.716  
C 6.243 -2.728 -17.796  
H 5.580 -3.571 -17.885  
N 5.914 -1.543 -17.309  
C 7.037 -0.750 -17.422  
H 7.039 0.276 -17.084  
C 6.010 3.787 -14.005  
H 5.540 4.766 -14.160  
H 5.748 3.473 -12.991  
C 5.441 2.776 -14.951  
N 4.901 3.050 -16.197  
H 4.823 3.945 -16.673  
C 4.360 1.909 -16.691  
H 3.867 1.861 -17.651  
N 4.515 0.910 -15.831  
C 5.185 1.445 -14.746  
H 5.426 0.840 -13.884

C 6.316 -2.795 -14.054  
H 6.828 -2.516 -14.981  
H 6.087 -1.860 -13.525  
C 5.011 -3.487 -14.362  
N 4.043 -2.834 -15.120  
C 3.010 -3.659 -15.223  
H 2.098 -3.455 -15.761  
N 3.250 -4.809 -14.562  
H 2.619 -5.620 -14.517  
C 4.509 -4.717 -14.008  
H 4.913 -5.514 -13.402  
CU 4.372 -1.069 -15.988  
O 4.351 -2.565 -19.997  
H 5.035 -1.886 -19.857  
H 4.921 -3.356 -20.196  
C 12.655 -0.412 -20.515  
C 5.590 10.822 -20.540  
C -0.960 1.730 -24.276  
C -0.677 3.188 -20.729  
C -2.121 6.933 -15.542  
C 10.434 -1.663 -17.166  
C 7.549 3.957 -14.076  
C 7.270 -3.610 -13.189

103

TS(2NA,3NA)

C 12.007 -0.634 -21.899  
H 12.230 -1.648 -22.236  
H 12.474 0.055 -22.602  
C 10.503 -0.504 -21.828  
C 9.820 0.712 -21.686  
H 10.362 1.652 -21.750  
C 8.452 0.731 -21.406  
H 7.918 1.670 -21.278  
C 7.760 -0.474 -21.254  
O 6.456 -0.523 -20.844  
H 6.059 0.365 -20.775  
C 8.395 -1.691 -21.493  
H 7.826 -2.611 -21.403  
C 9.756 -1.685 -21.773  
H 10.296 -2.615 -21.899  
C 4.710 9.906 -19.651  
H 3.659 10.186 -19.775  
H 4.988 10.040 -18.607  
C 4.826 8.414 -19.963  
O 4.702 7.554 -19.113  
O 4.982 8.112 -21.260  
H 5.028 7.140 -21.332  
C 0.065 0.595 -24.428  
H 0.313 0.476 -25.481  
H -0.344 -0.341 -24.050  
H 0.958 0.848 -23.844  
C 0.317 2.958 -19.710  
H 0.205 2.093 -19.047

|   |        |        |         |     |        |        |         |   |        |        |         |
|---|--------|--------|---------|-----|--------|--------|---------|---|--------|--------|---------|
| H | 0.229  | 3.822  | -19.040 | H   | 6.081  | -1.863 | -13.520 | C | 1.652  | 4.713  | -20.168 |
| C | 1.657  | 2.930  | -20.354 | C   | 5.008  | -3.493 | -14.357 | C | 2.658  | 2.577  | -20.761 |
| C | 2.308  | 4.177  | -20.625 | N   | 4.043  | -2.844 | -15.120 | H | 2.594  | 1.494  | -20.858 |
| C | 2.283  | 1.743  | -20.687 | C   | 3.010  | -3.668 | -15.223 | C | 2.789  | 5.373  | -20.546 |
| H | 1.771  | 0.793  | -20.552 | H   | 2.099  | -3.467 | -15.764 | H | 2.858  | 6.445  | -20.448 |
| C | 3.603  | 4.259  | -21.055 | N   | 3.247  | -4.815 | -14.556 | C | 3.844  | 3.226  | -21.131 |
| H | 4.089  | 5.217  | -21.190 | H   | 2.617  | -5.626 | -14.512 | C | 3.948  | 4.685  | -20.984 |
| C | 3.562  | 1.795  | -21.226 | C   | 4.505  | -4.721 | -13.998 | O | 0.631  | 5.477  | -19.711 |
| C | 4.332  | 3.052  | -21.275 | H   | 4.907  | -5.515 | -13.386 | H | 0.068  | 4.979  | -19.096 |
| O | 1.641  | 5.321  | -20.367 | CU  | 4.376  | -1.079 | -15.986 | N | 4.961  | 2.578  | -21.612 |
| H | 0.695  | 5.145  | -20.262 | O   | 4.434  | -2.362 | -20.172 | H | 4.810  | 1.737  | -22.158 |
| N | 4.244  | 0.713  | -21.667 | H   | 5.146  | -1.700 | -20.231 | H | 5.652  | 3.216  | -22.007 |
| H | 3.799  | -0.195 | -21.718 | H   | 4.940  | -3.208 | -20.236 | O | 5.039  | 5.268  | -21.231 |
| H | 4.984  | 0.906  | -22.332 | C   | 12.648 | -0.418 | -20.519 | C | -0.844 | 7.706  | -15.543 |
| O | 5.554  | 2.974  | -21.506 | C   | 5.587  | 10.829 | -20.540 | H | -0.626 | 8.050  | -14.521 |
| C | -0.810 | 7.663  | -15.584 | C   | -0.987 | 1.721  | -24.287 | H | -0.994 | 8.598  | -16.152 |
| H | -0.535 | 7.987  | -14.570 | C   | -0.873 | 2.949  | -20.686 | C | 0.304  | 6.936  | -16.084 |
| H | -0.972 | 8.569  | -16.171 | C   | -2.137 | 6.903  | -15.521 | C | 0.841  | 5.812  | -15.448 |
| C | 0.301  | 6.878  | -16.201 | C   | 10.437 | -1.665 | -17.165 | H | 0.370  | 5.434  | -14.544 |
| C | 0.870  | 5.767  | -15.572 | C   | 7.552  | 3.960  | -14.087 | C | 1.983  | 5.195  | -15.947 |
| H | 0.463  | 5.424  | -14.624 | C   | 7.267  | -3.610 | -13.182 | H | 2.420  | 4.327  | -15.462 |
| C | 1.958  | 5.109  | -16.135 |     |        |        |         | C | 2.592  | 5.742  | -17.074 |
| H | 2.409  | 4.247  | -15.656 | 103 |        |        |         | O | 3.739  | 5.184  | -17.560 |
| C | 2.490  | 5.593  | -17.328 | 3NA |        |        |         | H | 4.118  | 5.848  | -18.172 |
| O | 3.575  | 4.957  | -17.868 | C   | 11.957 | -0.662 | -21.879 | C | 2.051  | 6.842  | -17.729 |
| H | 3.932  | 5.549  | -18.555 | H   | 12.126 | -1.698 | -22.186 | H | 2.550  | 7.251  | -18.591 |
| C | 1.929  | 6.692  | -17.977 | H   | 12.445 | -0.021 | -22.614 | C | 0.903  | 7.424  | -17.239 |
| H | 2.351  | 7.037  | -18.908 | C   | 10.459 | -0.426 | -21.803 | H | 0.478  | 8.285  | -17.749 |
| C | 0.829  | 7.315  | -17.416 | C   | 9.892  | 0.848  | -21.671 | C | 9.479  | -1.121 | -18.255 |
| H | 0.383  | 8.169  | -17.920 | H   | 10.521 | 1.733  | -21.714 | H | 9.811  | -1.511 | -19.219 |
| C | 9.479  | -1.115 | -18.251 | C   | 8.524  | 1.001  | -21.451 | H | 9.580  | -0.034 | -18.317 |
| H | 9.809  | -1.501 | -19.217 | H   | 8.104  | 1.995  | -21.329 | C | 8.054  | -1.468 | -18.007 |
| H | 9.575  | -0.027 | -18.307 | C   | 7.688  | -0.114 | -21.361 | N | 7.504  | -2.711 | -18.282 |
| C | 8.058  | -1.469 | -17.995 | O   | 6.340  | -0.002 | -21.095 | H | 7.969  | -3.484 | -18.755 |
| N | 7.513  | -2.716 | -18.258 | H   | 6.132  | 0.906  | -20.800 | C | 6.218  | -2.705 | -17.856 |
| H | 7.977  | -3.485 | -18.738 | C   | 8.218  | -1.390 | -21.548 | H | 5.545  | -3.539 | -17.968 |
| C | 6.229  | -2.713 | -17.832 | H   | 7.562  | -2.252 | -21.481 | N | 5.908  | -1.534 | -17.331 |
| H | 5.560  | -3.552 | -17.930 | C   | 9.590  | -1.524 | -21.764 | C | 7.042  | -0.753 | -17.424 |
| N | 5.913  | -1.538 | -17.319 | H   | 10.023 | -2.512 | -21.860 | H | 7.057  | 0.262  | -17.051 |
| C | 7.043  | -0.753 | -17.417 | C   | 4.700  | 9.909  | -19.665 | C | 6.016  | 3.790  | -14.018 |
| H | 7.052  | 0.268  | -17.064 | H   | 3.648  | 10.173 | -19.818 | H | 5.544  | 4.763  | -14.203 |
| C | 6.013  | 3.788  | -14.011 | H   | 4.953  | 10.073 | -18.619 | H | 5.755  | 3.505  | -12.995 |
| H | 5.542  | 4.764  | -14.181 | C   | 4.840  | 8.400  | -19.920 | C | 5.451  | 2.755  | -14.937 |
| H | 5.753  | 3.489  | -12.992 | O   | 4.713  | 7.610  | -18.996 | N | 4.878  | 3.026  | -16.165 |
| C | 5.446  | 2.766  | -14.944 | O   | 4.990  | 8.008  | -21.175 | H | 4.737  | 3.941  | -16.605 |
| N | 4.890  | 3.038  | -16.181 | H   | 5.037  | 6.999  | -21.194 | C | 4.344  | 1.880  | -16.649 |
| H | 4.779  | 3.940  | -16.646 | C   | 0.058  | 0.582  | -24.440 | H | 3.828  | 1.821  | -17.596 |
| C | 4.353  | 1.894  | -16.670 | H   | 0.304  | 0.466  | -25.494 | N | 4.540  | 0.878  | -15.800 |
| H | 3.850  | 1.838  | -17.624 | H   | -0.358 | -0.353 | -24.067 | C | 5.229  | 1.417  | -14.730 |
| N | 4.528  | 0.894  | -15.815 | H   | 0.955  | 0.822  | -23.857 | H | 5.506  | 0.810  | -13.881 |
| C | 5.207  | 1.431  | -14.737 | C   | 0.304  | 2.540  | -19.841 | C | 6.308  | -2.799 | -14.045 |
| H | 5.467  | 0.825  | -13.882 | H   | 0.512  | 1.465  | -19.859 | H | 6.818  | -2.520 | -14.973 |
| C | 6.311  | -2.798 | -14.048 | H   | 0.046  | 2.766  | -18.798 | H | 6.075  | -1.865 | -13.516 |
| H | 6.823  | -2.519 | -14.976 | C   | 1.553  | 3.277  | -20.269 | C | 5.005  | -3.498 | -14.353 |



|     |        |        |         |   |        |        |         |             |        |        |         |
|-----|--------|--------|---------|---|--------|--------|---------|-------------|--------|--------|---------|
| N   | 4.043  | -2.854 | -15.122 | H | 0.813  | 1.337  | -19.149 | H           | 2.098  | -3.470 | -15.766 |
| C   | 3.009  | -3.678 | -15.223 | C | 4.180  | 2.582  | -20.708 | N           | 3.251  | -4.813 | -14.561 |
| H   | 2.099  | -3.479 | -15.767 | H | 5.110  | 2.938  | -21.138 | H           | 2.621  | -5.624 | -14.512 |
| N   | 3.245  | -4.822 | -14.549 | C | 2.885  | 0.859  | -19.485 | C           | 4.510  | -4.715 | -14.006 |
| H   | 2.615  | -5.633 | -14.508 | C | 4.179  | 1.362  | -19.966 | H           | 4.913  | -5.507 | -13.391 |
| C   | 4.502  | -4.725 | -13.989 | O | 3.154  | 4.565  | -21.425 | CU          | 4.369  | -1.065 | -16.026 |
| H   | 4.902  | -5.516 | -13.371 | H | 2.291  | 4.845  | -21.771 | O           | 4.571  | -2.297 | -20.241 |
| CU  | 4.379  | -1.091 | -15.978 | N | 2.882  | -0.350 | -18.875 | H           | 5.240  | -1.677 | -20.601 |
| O   | 4.578  | -2.266 | -20.252 | H | 3.676  | -0.980 | -19.031 | H           | 5.059  | -3.157 | -20.241 |
| H   | 5.216  | -1.540 | -20.362 | H | 1.990  | -0.779 | -18.665 | C           | 12.658 | -0.413 | -20.515 |
| H   | 5.123  | -3.087 | -20.308 | O | 5.222  | 0.706  | -19.678 | C           | 5.589  | 10.823 | -20.540 |
| C   | 12.638 | -0.425 | -20.520 | C | -0.761 | 7.640  | -15.648 | C           | -0.961 | 1.730  | -24.276 |
| C   | 5.582  | 10.828 | -20.553 | H | -0.435 | 7.934  | -14.641 | C           | -0.690 | 3.182  | -20.731 |
| C   | -0.981 | 1.718  | -24.291 | H | -0.909 | 8.563  | -16.214 | C           | -2.121 | 6.933  | -15.543 |
| C   | -0.946 | 2.793  | -20.712 | C | 0.301  | 6.813  | -16.326 | C           | 10.429 | -1.662 | -17.174 |
| C   | -2.154 | 6.921  | -15.538 | C | 0.891  | 5.711  | -15.697 | C           | 7.553  | 3.958  | -14.073 |
| C   | 10.434 | -1.667 | -17.164 | H | 0.545  | 5.412  | -14.710 | C           | 7.270  | -3.610 | -13.190 |
| C   | 7.554  | 3.963  | -14.097 | C | 1.923  | 5.001  | -16.303 |             |        |        |         |
| C   | 7.267  | -3.608 | -13.180 | H | 2.385  | 4.150  | -15.812 |             |        |        |         |
|     |        |        |         | C | 2.387  | 5.406  | -17.556 | 103         |        |        |         |
| 103 |        |        |         | O | 3.435  | 4.715  | -18.112 | TS(4NA,5NA) |        |        |         |
| 4NA |        |        |         | H | 3.767  | 5.229  | -18.870 | C           | 12.017 | -0.646 | -21.899 |
| C   | 12.058 | -0.640 | -21.910 | C | 1.786  | 6.475  | -18.221 | H           | 12.220 | -1.671 | -22.213 |
| H   | 12.281 | -1.661 | -22.224 | H | 2.153  | 6.772  | -19.197 | H           | 12.514 | 0.017  | -22.609 |
| H   | 12.560 | 0.032  | -22.607 | C | 0.752  | 7.169  | -17.600 | C           | 10.516 | -0.468 | -21.867 |
| C   | 10.556 | -0.502 | -21.909 | H | 0.297  | 8.014  | -18.112 | C           | 9.881  | 0.761  | -21.642 |
| C   | 9.876  | 0.687  | -21.611 | C | 9.477  | -1.118 | -18.274 | H           | 10.464 | 1.675  | -21.578 |
| H   | 10.429 | 1.612  | -21.466 | H | 9.811  | -1.511 | -19.239 | C           | 8.499  | 0.822  | -21.475 |
| C   | 8.490  | 0.696  | -21.483 | H | 9.575  | -0.032 | -18.337 | H           | 8.009  | 1.776  | -21.299 |
| H   | 7.961  | 1.614  | -21.244 | C | 8.052  | -1.469 | -18.025 | C           | 7.728  | -0.341 | -21.529 |
| C   | 7.757  | -0.484 | -21.655 | N | 7.513  | -2.720 | -18.292 | O           | 6.369  | -0.316 | -21.321 |
| O   | 6.405  | -0.507 | -21.517 | H | 7.975  | -3.482 | -18.785 | H           | 6.142  | 0.464  | -20.792 |
| H   | 6.103  | 0.198  | -20.881 | C | 6.235  | -2.729 | -17.849 | C           | 8.329  | -1.565 | -21.811 |
| C   | 8.411  | -1.663 | -22.012 | H | 5.574  | -3.574 | -17.946 | H           | 7.717  | -2.461 | -21.861 |
| H   | 7.827  | -2.566 | -22.163 | N | 5.916  | -1.560 | -17.324 | C           | 9.710  | -1.606 | -21.979 |
| C   | 9.795  | -1.653 | -22.138 | C | 7.038  | -0.764 | -17.434 | H           | 10.208 | -2.546 | -22.181 |
| H   | 10.327 | -2.557 | -22.416 | H | 7.036  | 0.258  | -17.087 | C           | 4.703  | 9.908  | -19.651 |
| C   | 4.709  | 9.902  | -19.648 | C | 6.016  | 3.789  | -13.976 | H           | 3.656  | 10.216 | -19.745 |
| H   | 3.664  | 10.218 | -19.733 | H | 5.544  | 4.764  | -14.146 | H           | 5.003  | 10.015 | -18.609 |
| H   | 5.017  | 10.005 | -18.607 | H | 5.767  | 3.495  | -12.953 | C           | 4.760  | 8.416  | -19.987 |
| C   | 4.746  | 8.406  | -19.981 | C | 5.441  | 2.763  | -14.894 | O           | 4.529  | 7.551  | -19.164 |
| O   | 4.502  | 7.553  | -19.151 | N | 4.856  | 3.040  | -16.115 | O           | 4.988  | 8.116  | -21.274 |
| O   | 4.963  | 8.092  | -21.268 | H | 4.780  | 3.933  | -16.597 | H           | 4.958  | 7.143  | -21.351 |
| H   | 4.889  | 7.120  | -21.338 | C | 4.307  | 1.902  | -16.595 | C           | 0.075  | 0.607  | -24.410 |
| C   | 0.105  | 0.616  | -24.409 | H | 3.772  | 1.859  | -17.526 | H           | 0.321  | 0.483  | -25.463 |
| H   | 0.346  | 0.483  | -25.463 | N | 4.503  | 0.898  | -15.752 | H           | -0.337 | -0.326 | -24.029 |
| H   | -0.290 | -0.319 | -24.016 | C | 5.207  | 1.428  | -14.687 | H           | 0.970  | 0.853  | -23.827 |
| H   | 1.000  | 0.884  | -23.836 | H | 5.488  | 0.818  | -13.841 | C           | 0.609  | 3.805  | -20.182 |
| C   | 0.596  | 3.819  | -20.186 | C | 6.316  | -2.795 | -14.059 | H           | 0.366  | 4.373  | -19.278 |
| H   | 0.417  | 4.101  | -19.143 | H | 6.829  | -2.516 | -14.985 | H           | 0.997  | 4.549  | -20.892 |
| H   | 0.766  | 4.765  | -20.712 | H | 6.085  | -1.860 | -13.531 | C           | 1.569  | 2.720  | -19.811 |
| C   | 1.796  | 2.909  | -20.225 | C | 5.011  | -3.488 | -14.371 | C           | 2.765  | 2.457  | -20.548 |
| C   | 3.039  | 3.338  | -20.814 | N | 4.045  | -2.842 | -15.137 | C           | 1.202  | 1.876  | -18.771 |
| C   | 1.747  | 1.674  | -19.595 | C | 3.013  | -3.668 | -15.232 | H           | 0.278  | 2.076  | -18.237 |
|     |        |        |         |   |        |        |         | C           | 3.584  | 1.418  | -20.190 |

|   |        |        |         |     |        |        |         |   |        |        |         |
|---|--------|--------|---------|-----|--------|--------|---------|---|--------|--------|---------|
| H | 4.499  | 1.256  | -20.743 | H   | 2.621  | -5.611 | -14.545 | C | 1.183  | 0.872  | -17.522 |
| C | 1.945  | 0.742  | -18.456 | C   | 4.502  | -4.696 | -14.019 | C | 2.149  | -0.040 | -18.117 |
| C | 3.251  | 0.537  | -19.106 | H   | 4.902  | -5.488 | -13.404 | O | 2.810  | 1.739  | -21.271 |
| O | 3.134  | 3.238  | -21.612 | CU  | 4.379  | -1.026 | -16.104 | H | 2.514  | 2.620  | -21.546 |
| H | 2.436  | 3.886  | -21.793 | O   | 4.570  | -2.374 | -20.273 | N | 0.586  | 0.506  | -16.350 |
| N | 1.568  | -0.144 | -17.503 | H   | 5.192  | -1.646 | -20.434 | H | 0.728  | -0.470 | -16.102 |
| H | 2.111  | -0.994 | -17.424 | H   | 5.130  | -3.189 | -20.326 | H | -0.368 | 0.836  | -16.247 |
| H | 0.616  | -0.158 | -17.164 | C   | 12.648 | -0.418 | -20.516 | O | 2.456  | -1.110 | -17.476 |
| O | 4.038  | -0.323 | -18.642 | C   | 5.584  | 10.830 | -20.540 | C | -0.760 | 7.625  | -15.644 |
| C | -0.761 | 7.633  | -15.645 | C   | -0.974 | 1.736  | -24.269 | H | -0.408 | 7.854  | -14.629 |
| H | -0.423 | 7.895  | -14.634 | C   | -0.687 | 3.202  | -20.736 | H | -0.911 | 8.581  | -16.149 |
| H | -0.911 | 8.572  | -16.181 | C   | -2.123 | 6.930  | -15.545 | C | 0.277  | 6.839  | -16.403 |
| C | 0.288  | 6.826  | -16.363 | C   | 10.445 | -1.661 | -17.166 | C | 0.857  | 5.671  | -15.893 |
| C | 0.873  | 5.688  | -15.794 | C   | 7.565  | 3.964  | -14.077 | H | 0.515  | 5.280  | -14.938 |
| H | 0.530  | 5.344  | -14.821 | C   | 7.266  | -3.605 | -13.180 | C | 1.882  | 5.016  | -16.570 |
| C | 1.901  | 5.004  | -16.436 |     |        |        |         | H | 2.338  | 4.116  | -16.171 |
| H | 2.362  | 4.129  | -15.990 |     |        |        |         | C | 2.352  | 5.546  | -17.774 |
| C | 2.369  | 5.473  | -17.665 | 103 |        |        |         | O | 3.411  | 4.932  | -18.400 |
| O | 3.422  | 4.819  | -18.256 | 5NA |        |        |         | H | 3.856  | 5.626  | -18.924 |
| H | 3.822  | 5.440  | -18.892 | C   | 11.973 | -0.654 | -21.880 | C | 1.744  | 6.672  | -18.332 |
| C | 1.765  | 6.573  | -18.275 | H   | 12.155 | -1.685 | -22.194 | H | 2.097  | 7.057  | -19.283 |
| H | 2.125  | 6.917  | -19.239 | H   | 12.460 | -0.002 | -22.607 | C | 0.720  | 7.311  | -17.642 |
| C | 0.737  | 7.240  | -17.620 | C   | 10.472 | -0.441 | -21.814 | H | 0.269  | 8.203  | -18.069 |
| H | 0.284  | 8.110  | -18.091 | C   | 9.876  | 0.819  | -21.668 | C | 9.503  | -1.110 | -18.253 |
| C | 9.513  | -1.114 | -18.279 | H   | 10.488 | 1.717  | -21.677 | H | 9.841  | -1.501 | -19.215 |
| H | 9.861  | -1.504 | -19.239 | C   | 8.499  | 0.940  | -21.480 | H | 9.605  | -0.023 | -18.311 |
| H | 9.609  | -0.027 | -18.335 | H   | 8.055  | 1.923  | -21.347 | C | 8.078  | -1.455 | -18.011 |
| C | 8.093  | -1.471 | -18.039 | C   | 7.684  | -0.194 | -21.450 | N | 7.522  | -2.691 | -18.302 |
| N | 7.545  | -2.711 | -18.326 | O   | 6.325  | -0.133 | -21.248 | H | 7.983  | -3.464 | -18.779 |
| H | 7.995  | -3.468 | -18.837 | H   | 6.034  | 0.780  | -21.100 | C | 6.240  | -2.686 | -17.862 |
| C | 6.297  | -2.749 | -17.797 | C   | 8.249  | -1.456 | -21.629 | H | 5.557  | -3.510 | -17.982 |
| H | 5.620  | -3.579 | -17.909 | H   | 7.609  | -2.333 | -21.604 | N | 5.943  | -1.524 | -17.316 |
| N | 6.022  | -1.612 | -17.194 | C   | 9.627  | -1.557 | -21.806 | C | 7.076  | -0.746 | -17.405 |
| C | 7.117  | -0.799 | -17.354 | H   | 10.086 | -2.532 | -21.910 | H | 7.098  | 0.262  | -17.015 |
| H | 7.131  | 0.209  | -16.964 | C   | 4.700  | 9.915  | -19.671 | C | 6.032  | 3.797  | -14.044 |
| C | 6.032  | 3.809  | -13.959 | H   | 3.652  | 10.215 | -19.771 | H | 5.563  | 4.778  | -14.187 |
| H | 5.565  | 4.790  | -14.115 | H   | 4.995  | 10.031 | -18.627 | H | 5.765  | 3.469  | -13.035 |
| H | 5.790  | 3.505  | -12.937 | C   | 4.774  | 8.424  | -19.996 | C | 5.469  | 2.804  | -15.012 |
| C | 5.454  | 2.805  | -14.884 | O   | 4.556  | 7.561  | -19.166 | N | 4.915  | 3.125  | -16.241 |
| N | 4.908  | 3.116  | -16.112 | O   | 5.006  | 8.119  | -21.280 | H | 4.853  | 4.037  | -16.682 |
| H | 4.854  | 4.022  | -16.567 | H   | 4.990  | 7.147  | -21.356 | C | 4.378  | 1.999  | -16.776 |
| C | 4.378  | 1.991  | -16.639 | C   | 0.041  | 0.601  | -24.409 | H | 3.882  | 1.977  | -17.734 |
| H | 3.885  | 1.998  | -17.590 | H   | 0.298  | 0.487  | -25.461 | N | 4.546  | 0.970  | -15.960 |
| N | 4.545  | 0.963  | -15.818 | H   | -0.389 | -0.331 | -24.044 | C | 5.224  | 1.461  | -14.863 |
| C | 5.216  | 1.465  | -14.720 | H   | 0.931  | 0.824  | -23.808 | H | 5.479  | 0.821  | -14.031 |
| H | 5.480  | 0.831  | -13.887 | C   | 0.709  | 3.562  | -20.136 | C | 6.313  | -2.777 | -14.039 |
| C | 6.312  | -2.782 | -14.043 | H   | 0.550  | 4.361  | -19.407 | H | 6.833  | -2.486 | -14.957 |
| H | 6.827  | -2.497 | -14.965 | H   | 1.332  | 4.013  | -20.925 | H | 6.080  | -1.848 | -13.500 |
| H | 6.083  | -1.851 | -13.508 | C   | 1.353  | 2.389  | -19.421 | C | 5.005  | -3.458 | -14.381 |
| C | 5.004  | -3.465 | -14.372 | C   | 2.288  | 1.481  | -20.024 | N | 4.062  | -2.810 | -15.174 |
| N | 4.043  | -2.815 | -15.147 | C   | 0.873  | 2.079  | -18.158 | C | 3.032  | -3.633 | -15.298 |
| C | 3.019  | -3.648 | -15.257 | H   | 0.161  | 2.752  | -17.691 | H | 2.148  | -3.421 | -15.880 |
| H | 2.111  | -3.458 | -15.808 | C   | 2.692  | 0.323  | -19.387 | N | 3.243  | -4.781 | -14.618 |
| N | 3.250  | -4.798 | -14.589 | H   | 3.380  | -0.368 | -19.860 | H | 2.610  | -5.590 | -14.575 |

|         |        |        |         |   |        |        |         |     |        |        |         |
|---------|--------|--------|---------|---|--------|--------|---------|-----|--------|--------|---------|
| C       | 4.490  | -4.685 | -14.028 | C | 3.026  | 1.063  | -19.659 | N   | 3.250  | -4.824 | -14.546 |
| H       | 4.875  | -5.479 | -13.405 | H | 3.174  | 0.119  | -19.136 | H   | 2.621  | -5.636 | -14.500 |
| CU      | 4.172  | -1.052 | -16.321 | C | 3.917  | 2.759  | -21.219 | C   | 4.506  | -4.724 | -13.986 |
| O       | 4.626  | -2.278 | -20.289 | C | 4.140  | 1.579  | -20.380 | H   | 4.907  | -5.515 | -13.370 |
| H       | 5.289  | -1.589 | -20.467 | O | 0.899  | 1.533  | -18.636 | CU  | 4.399  | -1.095 | -15.980 |
| H       | 5.134  | -3.126 | -20.321 | H | 0.852  | 0.581  | -18.462 | O   | 4.425  | -2.335 | -20.071 |
| C       | 12.639 | -0.422 | -20.514 | N | 4.920  | 3.172  | -21.999 | H   | 5.104  | -1.701 | -20.388 |
| C       | 5.579  | 10.835 | -20.563 | H | 5.775  | 2.632  | -22.060 | H   | 4.917  | -3.183 | -20.207 |
| C       | -0.994 | 1.742  | -24.265 | H | 4.799  | 3.905  | -22.686 | O   | 3.338  | 3.245  | -26.285 |
| C       | -0.664 | 3.168  | -20.718 | O | 5.296  | 1.085  | -20.267 | H   | 3.142  | 4.185  | -26.108 |
| C       | -2.124 | 6.928  | -15.549 | C | -0.758 | 7.622  | -15.634 | H   | 2.812  | 2.756  | -25.620 |
| C       | 10.444 | -1.661 | -17.153 | H | -0.440 | 7.905  | -14.627 | H   | 12.480 | -0.478 | -20.921 |
| C       | 7.571  | 3.969  | -14.103 | H | -0.883 | 8.543  | -16.204 | H   | 5.332  | 10.563 | -20.275 |
| C       | 7.264  | -3.602 | -13.171 | C | 0.320  | 6.793  | -16.285 | H   | -0.657 | 1.401  | -24.327 |
|         |        |        |         | C | 0.923  | 5.724  | -15.602 | H   | -0.369 | 3.369  | -20.533 |
| 110     |        |        |         | H | 0.585  | 5.466  | -14.604 | H   | -1.725 | 7.132  | -15.569 |
| TS(1,6) |        |        |         | C | 1.962  | 4.997  | -16.194 | H   | 10.155 | -1.505 | -17.489 |
| C       | 12.056 | -0.631 | -21.911 | H | 2.430  | 4.174  | -15.670 | H   | 7.104  | 3.911  | -14.052 |
| H       | 12.303 | -1.638 | -22.243 | C | 2.410  | 5.353  | -17.474 | H   | 6.990  | -3.373 | -13.436 |
| H       | 12.535 | 0.067  | -22.599 | O | 3.449  | 4.663  | -18.035 |     |        |        |         |
| C       | 10.552 | -0.546 | -21.898 | H | 3.744  | 5.143  | -18.819 |     |        |        |         |
| C       | 9.815  | 0.620  | -21.656 | C | 1.800  | 6.404  | -18.173 | 110 |        |        |         |
| H       | 10.324 | 1.576  | -21.559 | H | 2.149  | 6.669  | -19.162 | 6   |        |        |         |
| C       | 8.428  | 0.558  | -21.503 | C | 0.756  | 7.115  | -17.577 | C   | 12.079 | -0.642 | -21.913 |
| H       | 7.860  | 1.457  | -21.271 | H | 0.288  | 7.933  | -18.114 | H   | 12.283 | -1.671 | -22.213 |
| C       | 7.769  | -0.674 | -21.597 | C | 9.482  | -1.118 | -18.267 | H   | 12.606 | 0.013  | -22.609 |
| O       | 6.422  | -0.804 | -21.415 | H | 9.817  | -1.507 | -19.233 | C   | 10.583 | -0.466 | -21.937 |
| H       | 6.038  | 0.063  | -21.155 | H | 9.579  | -0.031 | -18.326 | C   | 9.934  | 0.740  | -21.639 |
| C       | 8.481  | -1.832 | -21.891 | C | 8.058  | -1.470 | -18.020 | H   | 10.509 | 1.644  | -21.464 |
| H       | 7.938  | -2.768 | -21.975 | N | 7.511  | -2.713 | -18.295 | C   | 8.546  | 0.791  | -21.560 |
| C       | 9.856  | -1.750 | -22.041 | H | 7.969  | -3.478 | -18.788 | H   | 8.033  | 1.717  | -21.322 |
| H       | 10.443 | -2.635 | -22.251 | C | 6.232  | -2.717 | -17.852 | C   | 7.788  | -0.357 | -21.802 |
| C       | 4.709  | 9.915  | -19.640 | H | 5.560  | -3.552 | -17.960 | O   | 6.422  | -0.322 | -21.781 |
| H       | 3.663  | 10.226 | -19.730 | N | 5.923  | -1.548 | -17.318 | H   | 6.042  | -0.069 | -20.888 |
| H       | 5.015  | 10.025 | -18.600 | C | 7.051  | -0.762 | -17.421 | C   | 8.415  | -1.555 | -22.136 |
| C       | 4.770  | 8.426  | -19.972 | H | 7.066  | 0.253  | -17.051 | H   | 7.805  | -2.433 | -22.326 |
| O       | 4.552  | 7.550  | -19.161 | C | 6.015  | 3.788  | -13.980 | C   | 9.802  | -1.594 | -22.201 |
| O       | 4.998  | 8.127  | -21.267 | H | 5.540  | 4.761  | -14.159 | H   | 10.311 | -2.515 | -22.465 |
| H       | 5.001  | 7.154  | -21.321 | H | 5.767  | 3.503  | -12.954 | C   | 4.717  | 9.898  | -19.642 |
| C       | 0.075  | 0.596  | -24.457 | C | 5.450  | 2.751  | -14.887 | H   | 3.670  | 10.211 | -19.719 |
| H       | 0.234  | 0.462  | -25.526 | N | 5.015  | 2.984  | -16.172 | H   | 5.030  | 9.995  | -18.602 |
| H       | -0.344 | -0.333 | -24.069 | H | 4.978  | 3.871  | -16.663 | C   | 4.763  | 8.408  | -19.992 |
| C       | 1.429  | 0.933  | -23.828 | C | 4.496  | 1.838  | -16.665 | O   | 4.536  | 7.534  | -19.179 |
| O       | 2.130  | 1.882  | -24.215 | H | 4.092  | 1.754  | -17.654 | O   | 4.980  | 8.122  | -21.287 |
| N       | 1.816  | 0.101  | -22.848 | N | 4.561  | 0.872  | -15.765 | H   | 4.937  | 7.151  | -21.371 |
| H       | 1.165  | -0.578 | -22.452 | C | 5.154  | 1.433  | -14.653 | C   | 0.091  | 0.593  | -24.460 |
| H       | 2.683  | 0.286  | -22.367 | H | 5.323  | 0.855  | -13.761 | H   | 0.262  | 0.466  | -25.529 |
| C       | 0.495  | 3.853  | -20.090 | C | 6.311  | -2.799 | -14.049 | H   | -0.331 | -0.339 | -24.083 |
| H       | 0.284  | 4.007  | -19.027 | H | 6.819  | -2.522 | -14.978 | C   | 1.438  | 0.916  | -23.816 |
| H       | 0.627  | 4.835  | -20.553 | H | 6.080  | -1.864 | -13.520 | O   | 2.149  | 1.870  | -24.184 |
| C       | 1.732  | 3.054  | -20.245 | C | 5.007  | -3.498 | -14.353 | N   | 1.821  | 0.066  | -22.854 |
| C       | 1.896  | 1.832  | -19.503 | N | 4.043  | -2.856 | -15.122 | H   | 1.163  | -0.607 | -22.460 |
| C       | 2.707  | 3.457  | -21.124 | C | 3.011  | -3.683 | -15.221 | H   | 2.695  | 0.226  | -22.373 |
| H       | 2.538  | 4.338  | -21.740 | H | 2.102  | -3.490 | -15.767 | C   | 0.613  | 3.804  | -20.204 |

|   |        |        |         |         |        |        |         |   |        |        |         |
|---|--------|--------|---------|---------|--------|--------|---------|---|--------|--------|---------|
| H | 0.423  | 4.160  | -19.189 | H       | 6.828  | -2.511 | -14.980 | O | 1.987  | 1.663  | -24.332 |
| H | 0.865  | 4.672  | -20.823 | H       | 6.085  | -1.861 | -13.522 | N | 1.876  | -0.569 | -23.938 |
| C | 1.757  | 2.836  | -20.190 | C       | 5.011  | -3.485 | -14.370 | H | 1.311  | -1.393 | -23.776 |
| C | 1.797  | 1.815  | -19.172 | N       | 4.049  | -2.835 | -15.139 | H | 2.870  | -0.631 | -23.775 |
| C | 2.746  | 2.847  | -21.146 | C       | 3.016  | -3.660 | -15.245 | C | 0.678  | 3.756  | -20.244 |
| H | 2.682  | 3.553  | -21.970 | H       | 2.109  | -3.462 | -15.792 | H | 0.500  | 4.196  | -19.252 |
| C | 2.794  | 0.863  | -19.149 | N       | 3.250  | -4.807 | -14.576 | H | 1.004  | 4.573  | -20.903 |
| H | 2.836  | 0.104  | -18.372 | H       | 2.617  | -5.617 | -14.529 | C | 1.729  | 2.679  | -20.094 |
| C | 3.811  | 1.916  | -21.134 | C       | 4.505  | -4.713 | -14.013 | C | 2.921  | 2.914  | -19.314 |
| C | 3.913  | 0.954  | -20.022 | H       | 4.903  | -5.507 | -13.398 | C | 1.514  | 1.382  | -20.477 |
| O | 0.825  | 1.905  | -18.246 | CU      | 4.395  | -1.060 | -16.003 | H | 0.658  | 1.049  | -21.053 |
| H | 0.728  | 1.086  | -17.733 | O       | 4.218  | -2.465 | -19.990 | C | 3.759  | 1.919  | -18.853 |
| N | 4.698  | 1.873  | -22.153 | H       | 4.657  | -1.621 | -19.776 | H | 4.606  | 2.144  | -18.217 |
| H | 5.413  | 1.141  | -22.203 | H       | 4.936  | -3.117 | -20.146 | C | 2.175  | 0.369  | -19.797 |
| H | 4.471  | 2.353  | -23.016 | O       | 3.341  | 3.253  | -26.276 | C | 3.377  | 0.561  | -19.004 |
| O | 4.955  | 0.248  | -19.819 | H       | 3.138  | 4.193  | -26.097 | O | 3.240  | 4.196  | -19.034 |
| C | -0.753 | 7.629  | -15.648 | H       | 2.794  | 2.753  | -25.636 | H | 2.418  | 4.710  | -18.968 |
| H | -0.431 | 7.931  | -14.642 | C       | 12.661 | -0.413 | -20.513 | N | 1.500  | -0.762 | -19.611 |
| H | -0.891 | 8.546  | -16.225 | C       | 5.591  | 10.823 | -20.535 | H | 2.081  | -1.546 | -19.315 |
| C | 0.309  | 6.786  | -16.309 | C       | -0.948 | 1.723  | -24.281 | H | 0.792  | -0.984 | -20.317 |
| C | 0.886  | 5.681  | -15.670 | C       | -0.689 | 3.179  | -20.732 | O | 3.920  | -0.433 | -18.448 |
| H | 0.532  | 5.392  | -14.683 | C       | -2.118 | 6.934  | -15.542 | C | -0.861 | 7.749  | -15.610 |
| C | 1.913  | 4.954  | -16.265 | C       | 10.429 | -1.663 | -17.176 | H | -0.642 | 8.169  | -14.619 |
| H | 2.361  | 4.099  | -15.769 | C       | 7.551  | 3.959  | -14.068 | H | -1.025 | 8.589  | -16.285 |
| C | 2.387  | 5.346  | -17.518 | C       | 7.270  | -3.609 | -13.190 | C | 0.299  | 6.949  | -16.069 |
| O | 3.432  | 4.638  | -18.072 |         |        |        |         | C | 1.001  | 6.167  | -15.149 |
| H | 3.769  | 5.158  | -18.821 | 110     |        |        |         | H | 0.617  | 6.046  | -14.139 |
| C | 1.807  | 6.422  | -18.188 | TS(6,5) |        |        |         | C | 2.217  | 5.617  | -15.491 |
| H | 2.179  | 6.713  | -19.165 | C       | 12.007 | -0.636 | -21.899 | H | 2.824  | 5.072  | -14.777 |
| C | 0.777  | 7.130  | -17.580 | H       | 12.226 | -1.654 | -22.227 | C | 2.739  | 5.881  | -16.754 |
| H | 0.335  | 7.976  | -18.103 | H       | 12.491 | 0.041  | -22.604 | O | 4.017  | 5.491  | -16.952 |
| C | 9.482  | -1.121 | -18.280 | C       | 10.499 | -0.490 | -21.863 | H | 4.313  | 5.930  | -17.767 |
| H | 9.820  | -1.517 | -19.243 | C       | 9.824  | 0.707  | -21.589 | C | 1.982  | 6.525  | -17.742 |
| H | 9.582  | -0.035 | -18.344 | H       | 10.378 | 1.636  | -21.488 | H | 2.392  | 6.706  | -18.731 |
| C | 8.058  | -1.471 | -18.032 | C       | 8.439  | 0.723  | -21.415 | C | 0.756  | 7.069  | -17.377 |
| N | 7.511  | -2.717 | -18.299 | H       | 7.926  | 1.659  | -21.210 | H | 0.176  | 7.643  | -18.097 |
| H | 7.968  | -3.486 | -18.788 | C       | 7.697  | -0.460 | -21.492 | C | 9.509  | -1.113 | -18.281 |
| C | 6.238  | -2.725 | -17.840 | O       | 6.349  | -0.512 | -21.239 | H | 9.836  | -1.525 | -19.239 |
| H | 5.566  | -3.560 | -17.945 | H       | 6.069  | 0.303  | -20.793 | H | 9.627  | -0.029 | -18.354 |
| N | 5.931  | -1.555 | -17.310 | C       | 8.339  | -1.647 | -21.853 | C | 8.087  | -1.437 | -18.012 |
| C | 7.053  | -0.764 | -17.426 | H       | 7.756  | -2.558 | -21.947 | N | 7.501  | -2.654 | -18.316 |
| H | 7.063  | 0.253  | -17.063 | C       | 9.719  | -1.640 | -22.038 | H | 7.925  | -3.411 | -18.848 |
| C | 6.017  | 3.787  | -13.939 | H       | 10.239 | -2.552 | -22.308 | C | 6.269  | -2.676 | -17.747 |
| H | 5.539  | 4.763  | -14.091 | C       | 4.711  | 9.912  | -19.637 | H | 5.561  | -3.480 | -17.859 |
| H | 5.788  | 3.482  | -12.915 | H       | 3.665  | 10.221 | -19.726 | N | 6.039  | -1.546 | -17.109 |
| C | 5.440  | 2.769  | -14.855 | H       | 5.019  | 10.023 | -18.597 | C | 7.150  | -0.759 | -17.277 |
| N | 4.951  | 3.045  | -16.116 | C       | 4.769  | 8.421  | -19.964 | H | 7.213  | 0.233  | -16.849 |
| H | 4.873  | 3.943  | -16.584 | O       | 4.557  | 7.563  | -19.128 | C | 6.008  | 3.838  | -14.000 |
| C | 4.432  | 1.910  | -16.631 | O       | 4.976  | 8.110  | -21.252 | H | 5.575  | 4.770  | -14.382 |
| H | 3.981  | 1.867  | -17.605 | H       | 4.937  | 7.136  | -21.322 | H | 5.710  | 3.769  | -12.949 |
| N | 4.549  | 0.908  | -15.770 | C       | -0.143 | 0.478  | -24.539 | C | 5.391  | 2.674  | -14.715 |
| C | 5.176  | 1.438  | -14.656 | H       | -0.200 | 0.245  | -25.597 | N | 4.264  | 2.886  | -15.495 |
| H | 5.391  | 0.831  | -13.789 | H       | -0.589 | -0.365 | -24.010 | H | 4.057  | 3.756  | -15.979 |
| C | 6.315  | -2.794 | -14.055 | C       | 1.326  | 0.626  | -24.229 | C | 3.685  | 1.689  | -15.745 |



|   |        |        |         |    |        |        |         |   |        |        |         |
|---|--------|--------|---------|----|--------|--------|---------|---|--------|--------|---------|
| H | 3.651  | 10.240 | -19.747 | N  | 5.877  | -1.543 | -17.452 | C | 8.350  | -1.677 | -21.513 |
| H | 5.004  | 10.034 | -18.622 | C  | 7.006  | -0.755 | -17.537 | H | 7.764  | -2.591 | -21.462 |
| C | 4.735  | 8.430  | -19.988 | H  | 6.992  | 0.278  | -17.220 | C | 9.728  | -1.702 | -21.716 |
| O | 4.458  | 7.577  | -19.165 | C  | 6.035  | 3.804  | -14.037 | H | 10.261 | -2.642 | -21.782 |
| O | 5.008  | 8.116  | -21.262 | H  | 5.568  | 4.785  | -14.188 | C | 4.690  | 9.916  | -19.663 |
| H | 4.946  | 7.146  | -21.342 | H  | 5.768  | 3.483  | -13.027 | H | 3.645  | 10.222 | -19.775 |
| C | -0.003 | 0.568  | -24.469 | C  | 5.484  | 2.803  | -14.998 | H | 4.977  | 10.045 | -18.619 |
| H | 0.123  | 0.418  | -25.540 | N  | 4.961  | 3.105  | -16.244 | C | 4.748  | 8.406  | -19.949 |
| H | -0.440 | -0.343 | -24.059 | H  | 4.869  | 4.016  | -16.686 | O | 4.494  | 7.592  | -19.084 |
| C | 1.381  | 0.861  | -23.894 | C  | 4.456  | 1.966  | -16.781 | O | 4.993  | 8.042  | -21.213 |
| O | 2.081  | 1.813  | -24.270 | H  | 3.962  | 1.939  | -17.739 | H | 4.953  | 7.059  | -21.254 |
| N | 1.816  | -0.023 | -22.979 | N  | 4.623  | 0.944  | -15.953 | C | 0.053  | 0.593  | -24.448 |
| H | 1.176  | -0.674 | -22.523 | C  | 5.261  | 1.458  | -14.843 | H | 0.208  | 0.451  | -25.516 |
| H | 2.727  | 0.123  | -22.571 | H  | 5.508  | 0.826  | -14.000 | H | -0.366 | -0.330 | -24.046 |
| C | 0.669  | 3.609  | -20.083 | C  | 6.317  | -2.783 | -14.040 | C | 1.407  | 0.949  | -23.827 |
| H | 0.500  | 4.513  | -19.487 | H  | 6.839  | -2.492 | -14.958 | O | 2.140  | 1.819  | -24.313 |
| H | 1.364  | 3.905  | -20.878 | H  | 6.081  | -1.854 | -13.503 | N | 1.741  | 0.261  | -22.717 |
| C | 1.267  | 2.492  | -19.258 | C  | 5.012  | -3.466 | -14.378 | H | 1.080  | -0.385 | -22.289 |
| C | 0.912  | 2.260  | -17.876 | N  | 4.069  | -2.808 | -15.160 | H | 2.573  | 0.537  | -22.207 |
| C | 2.056  | 1.547  | -19.893 | C  | 3.027  | -3.618 | -15.275 | C | 0.503  | 3.743  | -19.969 |
| H | 2.334  | 1.712  | -20.931 | H  | 2.133  | -3.385 | -15.835 | H | 0.373  | 3.581  | -18.892 |
| C | 1.255  | 1.085  | -17.236 | N  | 3.236  | -4.771 | -14.603 | H | 0.497  | 4.821  | -20.146 |
| H | 0.940  | 0.911  | -16.215 | H  | 2.596  | -5.575 | -14.556 | C | 1.849  | 3.216  | -20.375 |
| C | 2.432  | 0.355  | -19.261 | C  | 4.489  | -4.690 | -14.024 | C | 2.419  | 1.919  | -19.808 |
| C | 2.004  | 0.074  | -17.887 | H  | 4.871  | -5.488 | -13.404 | C | 2.647  | 4.031  | -21.099 |
| O | 0.269  | 3.188  | -17.129 | CU | 4.185  | -1.049 | -16.234 | H | 2.298  | 4.996  | -21.454 |
| H | -0.055 | 3.926  | -17.666 | O  | 5.109  | -2.150 | -20.611 | C | 3.692  | 1.514  | -20.281 |
| N | 3.156  | -0.608 | -19.877 | H  | 5.776  | -1.550 | -20.247 | H | 4.064  | 0.539  | -19.979 |
| H | 3.515  | -1.347 | -19.283 | H  | 5.470  | -3.071 | -20.499 | C | 4.083  | 3.779  | -21.238 |
| H | 3.781  | -0.380 | -20.637 | O  | 3.358  | 3.186  | -26.332 | C | 4.529  | 2.326  | -21.072 |
| O | 2.378  | -1.020 | -17.339 | H  | 3.158  | 4.115  | -26.110 | O | 1.776  | 1.248  | -18.948 |
| C | -0.789 | 7.676  | -15.621 | H  | 2.833  | 2.668  | -25.688 | O | 4.884  | 4.699  | -21.336 |
| H | -0.485 | 7.962  | -14.606 | C  | 12.640 | -0.425 | -20.515 | O | 5.621  | 1.975  | -21.570 |
| H | -0.957 | 8.600  | -16.175 | C  | 5.578  | 10.834 | -20.561 | C | 9.452  | -1.127 | -18.239 |
| C | 0.306  | 6.903  | -16.297 | C  | -0.991 | 1.737  | -24.270 | H | 9.757  | -1.525 | -19.209 |
| C | 1.057  | 5.940  | -15.616 | C  | -0.672 | 3.173  | -20.710 | H | 9.551  | -0.041 | -18.313 |
| H | 0.808  | 5.697  | -14.586 | C  | -2.128 | 6.930  | -15.546 | C | 8.032  | -1.475 | -17.950 |
| C | 2.124  | 5.295  | -16.232 | C  | 10.439 | -1.661 | -17.155 | N | 7.464  | -2.707 | -18.242 |
| H | 2.698  | 4.537  | -15.710 | C  | 7.573  | 3.971  | -14.102 | H | 7.915  | -3.462 | -18.759 |
| C | 2.445  | 5.617  | -17.549 | C  | 7.267  | -3.604 | -13.170 | C | 6.194  | -2.715 | -17.797 |
| O | 3.504  | 4.982  | -18.153 |    |        |        |         | H | 5.509  | -3.536 | -17.913 |
| H | 3.883  | 5.632  | -18.775 | 97 |        |        |         | N | 5.912  | -1.549 | -17.230 |
| C | 1.692  | 6.555  | -18.257 | OX |        |        |         | C | 7.046  | -0.762 | -17.325 |
| H | 1.958  | 6.790  | -19.283 | C  | 11.993 | -0.666 | -21.882 | H | 7.076  | 0.245  | -16.944 |
| C | 0.632  | 7.194  | -17.626 | H  | 12.217 | -1.684 | -22.207 | C | 6.023  | 3.733  | -14.042 |
| H | 0.055  | 7.939  | -18.169 | H  | 12.446 | 0.017  | -22.600 | H | 5.521  | 4.696  | -14.191 |
| C | 9.485  | -1.121 | -18.253 | C  | 10.492 | -0.535 | -21.795 | H | 5.764  | 3.392  | -13.036 |
| H | 9.831  | -1.502 | -19.218 | C  | 9.828  | 0.693  | -21.677 | C | 5.519  | 2.723  | -15.025 |
| H | 9.569  | -0.032 | -18.307 | H  | 10.391 | 1.622  | -21.732 | N | 5.063  | 3.036  | -16.292 |
| C | 8.057  | -1.487 | -18.028 | C  | 8.455  | 0.741  | -21.456 | H | 4.985  | 3.959  | -16.713 |
| N | 7.534  | -2.753 | -18.253 | H  | 7.945  | 1.692  | -21.356 | C | 4.613  | 1.915  | -16.893 |
| H | 8.022  | -3.544 | -18.669 | C  | 7.711  | -0.445 | -21.367 | H | 4.211  | 1.887  | -17.897 |
| C | 6.229  | -2.740 | -17.881 | O  | 6.368  | -0.419 | -21.127 | N | 4.756  | 0.881  | -16.074 |
| H | 5.574  | -3.593 | -17.961 | H  | 6.015  | 0.520  | -21.309 | C | 5.316  | 1.369  | -14.908 |

H 5.529 0.722 -14.070  
C 6.318 -2.769 -14.070  
H 6.865 -2.463 -14.967  
H 6.069 -1.849 -13.524  
C 5.019 -3.451 -14.457  
N 4.096 -2.850 -15.325  
C 3.065 -3.682 -15.425  
H 2.190 -3.522 -16.037  
N 3.252 -4.780 -14.670  
H 2.616 -5.589 -14.602  
C 4.479 -4.649 -14.051  
H 4.842 -5.404 -13.368  
CU 4.147 -1.044 -16.490  
O 4.612 -2.264 -20.268  
H 5.278 -1.608 -20.600  
H 5.086 -3.133 -20.299  
O 3.304 3.170 -26.238  
H 3.162 4.087 -25.938  
H 2.942 2.635 -25.487  
O 2.226 -0.337 -15.910  
H 1.990 0.328 -16.592  
H 1.524 -1.010 -15.980  
O 3.066 -1.266 -18.326  
H 3.630 -1.624 -19.067  
H 2.610 -0.444 -18.652  
C 12.646 -0.425 -20.515  
C 5.580 10.827 -20.553  
C -0.970 1.737 -24.265  
C -0.721 3.140 -20.694  
C 10.430 -1.667 -17.164  
C 7.555 3.957 -14.098  
C 7.257 -3.600 -13.189

64

TS(OX, OXrot)

C 11.990 -0.652 -21.888  
H 12.234 -1.659 -22.229  
H 12.434 0.051 -22.594  
C 10.482 -0.564 -21.818  
C 9.762 0.625 -21.653  
H 10.282 1.581 -21.649  
C 8.383 0.604 -21.457  
H 7.838 1.527 -21.308  
C 7.684 -0.617 -21.425  
O 6.340 -0.690 -21.194  
H 5.967 0.233 -21.318  
C 8.385 -1.807 -21.629  
H 7.838 -2.745 -21.617  
C 9.762 -1.760 -21.821  
H 10.339 -2.669 -21.939  
C 4.691 9.939 -19.646  
H 3.646 10.243 -19.762  
H 4.981 10.075 -18.605  
C 4.759 8.437 -19.928

O 4.560 7.614 -19.065  
O 4.959 8.084 -21.212  
H 4.889 7.109 -21.235  
C -0.223 0.434 -24.531  
H -0.289 0.210 -25.587  
H -0.691 -0.387 -23.991  
C 1.244 0.591 -24.259  
O 1.890 1.451 -24.857  
N 1.778 -0.272 -23.378  
H 1.166 -0.831 -22.788  
H 2.745 -0.113 -23.125  
C 0.556 3.867 -20.278  
H 0.588 3.869 -19.187  
H 0.497 4.925 -20.560  
C 1.870 3.323 -20.804  
C 2.963 3.782 -19.908  
C 2.259 2.651 -21.912  
H 1.658 2.370 -22.761  
C 4.225 3.185 -19.920  
H 4.815 3.502 -19.081  
C 3.630 2.142 -22.062  
C 4.634 2.345 -20.944  
O 2.678 4.703 -19.119  
O 3.977 1.470 -23.023  
O 5.716 1.726 -21.057  
C -0.881 7.789 -15.508  
H -0.753 8.223 -14.504  
H -1.033 8.621 -16.197  
C 0.353 7.065 -15.888  
C 1.106 6.342 -14.963  
H 0.750 6.250 -13.938  
C 2.308 5.755 -15.345  
H 2.915 5.173 -14.657  
C 2.760 5.929 -16.650  
O 3.923 5.360 -17.037  
H 3.785 5.228 -18.011  
C 2.015 6.676 -17.576  
H 2.389 6.814 -18.577  
C 0.811 7.215 -17.195  
H 0.219 7.787 -17.908  
C 12.641 -0.424 -20.515  
C 5.582 10.834 -20.548  
C -1.017 1.729 -24.275  
C -0.723 3.158 -20.735  
C -2.148 6.930 -15.533

97

OXrot

C 11.957 -0.650 -21.874  
H 12.222 -1.642 -22.242  
H 12.352 0.080 -22.580  
C 10.448 -0.606 -21.747  
C 9.690 0.569 -21.647

H 10.179 1.537 -21.732  
C 8.317 0.517 -21.402  
H 7.728 1.426 -21.329  
C 7.665 -0.719 -21.257  
O 6.343 -0.807 -20.942  
H 5.852 0.029 -21.231  
C 8.401 -1.898 -21.400  
H 7.889 -2.851 -21.316  
C 9.773 -1.823 -21.629  
H 10.379 -2.721 -21.673  
C 4.697 9.930 -19.644  
H 3.652 10.238 -19.752  
H 4.996 10.067 -18.606  
C 4.736 8.420 -19.923  
O 4.524 7.610 -19.045  
O 4.901 8.053 -21.202  
H 4.677 7.098 -21.254  
C 0.011 0.563 -24.460  
H 0.126 0.400 -25.530  
H -0.423 -0.342 -24.036  
C 1.408 0.863 -23.918  
O 2.103 1.784 -24.357  
N 1.856 0.012 -22.970  
H 1.231 -0.666 -22.539  
H 2.811 0.103 -22.649  
C 0.552 3.882 -20.160  
H 0.451 3.979 -19.072  
H 0.584 4.894 -20.572  
C 1.853 3.199 -20.477  
C 2.988 4.033 -21.092  
C 2.109 1.921 -20.129  
H 1.381 1.303 -19.607  
C 4.128 3.358 -21.614  
H 4.859 3.944 -22.158  
C 3.392 1.314 -20.438  
C 4.343 2.000 -21.416  
O 2.899 5.272 -21.067  
O 3.743 0.244 -19.914  
O 5.283 1.311 -21.899  
C 9.472 -1.116 -18.240  
H 9.784 -1.509 -19.208  
H 9.571 -0.030 -18.305  
C 8.059 -1.470 -17.955  
N 7.502 -2.706 -18.243  
H 7.945 -3.444 -18.790  
C 6.247 -2.736 -17.758  
H 5.568 -3.563 -17.866  
N 5.969 -1.580 -17.170  
C 7.085 -0.778 -17.292  
H 7.115 0.225 -16.899  
C 6.022 3.744 -14.052  
H 5.527 4.707 -14.224  
H 5.752 3.425 -13.042  
C 5.520 2.716 -15.019

N 5.009 3.001 -16.272  
H 4.891 3.916 -16.704  
C 4.574 1.856 -16.841  
H 4.132 1.798 -17.823  
N 4.778 0.838 -16.019  
C 5.364 1.358 -14.881  
H 5.634 0.728 -14.046  
C 6.310 -2.792 -14.050  
H 6.839 -2.482 -14.955  
H 6.049 -1.876 -13.502  
C 5.029 -3.508 -14.414  
N 4.121 -2.931 -15.297  
C 3.090 -3.763 -15.403  
H 2.227 -3.613 -16.034  
N 3.272 -4.844 -14.623  
H 2.637 -5.653 -14.557  
C 4.491 -4.702 -13.990  
H 4.847 -5.446 -13.292  
CU 4.240 -1.110 -16.337  
O 4.411 -2.537 -20.046  
H 5.039 -1.806 -20.256  
H 4.973 -3.347 -20.198  
O 3.304 3.155 -26.240  
H 3.108 4.062 -25.944  
H 2.923 2.593 -25.517  
O 2.285 -0.603 -15.640  
H 1.788 -0.795 -16.461  
H 1.940 -1.246 -14.997  
O 2.997 -1.492 -18.086  
H 3.493 -2.114 -18.693  
H 3.033 -0.692 -18.676  
C 12.640 -0.422 -20.517  
C 5.581 10.829 -20.552  
C -0.973 1.737 -24.264  
C -0.709 3.159 -20.707  
C 10.436 -1.667 -17.162  
C 7.555 3.959 -14.099  
C 7.264 -3.606 -13.182

93

OXNA

C 11.992 -0.665 -21.882  
H 12.215 -1.682 -22.208  
H 12.447 0.019 -22.600  
C 10.490 -0.531 -21.795  
C 9.827 0.697 -21.676  
H 10.390 1.626 -21.727  
C 8.453 0.745 -21.458  
H 7.943 1.696 -21.355  
C 7.707 -0.441 -21.372  
O 6.365 -0.417 -21.134  
H 6.006 0.523 -21.308  
C 8.347 -1.673 -21.519

H 7.761 -2.586 -21.469  
C 9.725 -1.697 -21.720  
H 10.257 -2.638 -21.789  
C 4.689 9.917 -19.662  
H 3.644 10.223 -19.775  
H 4.976 10.047 -18.619  
C 4.748 8.406 -19.946  
O 4.492 7.595 -19.079  
O 4.994 8.038 -21.209  
H 4.956 7.055 -21.243  
C 0.063 0.606 -24.418  
H 0.293 0.477 -25.474  
H -0.349 -0.323 -24.028  
H 0.968 0.849 -23.849  
C 0.496 3.749 -19.960  
H 0.359 3.587 -18.884  
H 0.488 4.827 -20.138  
C 1.847 3.225 -20.349  
C 2.414 1.925 -19.778  
C 2.654 4.048 -21.055  
H 2.312 5.021 -21.396  
C 3.687 1.521 -20.248  
H 4.038 0.529 -19.979  
C 4.087 3.787 -21.196  
C 4.520 2.327 -21.042  
O 1.769 1.265 -18.913  
O 4.895 4.700 -21.314  
O 5.602 1.973 -21.566  
C 9.452 -1.128 -18.239  
H 9.756 -1.528 -19.209  
H 9.551 -0.042 -18.315  
C 8.031 -1.474 -17.951  
N 7.462 -2.707 -18.237  
H 7.913 -3.466 -18.748  
C 6.189 -2.709 -17.797  
H 5.502 -3.529 -17.910  
N 5.908 -1.539 -17.239  
C 7.044 -0.756 -17.334  
H 7.075 0.254 -16.959  
C 6.024 3.733 -14.037  
H 5.521 4.697 -14.183  
H 5.767 3.391 -13.032  
C 5.519 2.726 -15.022  
N 5.069 3.043 -16.290  
H 4.993 3.967 -16.709  
C 4.623 1.923 -16.897  
H 4.229 1.899 -17.904  
N 4.762 0.888 -16.080  
C 5.315 1.372 -14.909  
H 5.525 0.723 -14.072  
C 6.318 -2.766 -14.072  
H 6.866 -2.462 -14.969  
H 6.072 -1.845 -13.526  
C 5.016 -3.443 -14.459

N 4.092 -2.835 -15.321  
C 3.061 -3.667 -15.424  
H 2.185 -3.503 -16.033  
N 3.249 -4.771 -14.676  
H 2.613 -5.579 -14.610  
C 4.478 -4.644 -14.059  
H 4.842 -5.403 -13.382  
CU 4.137 -1.025 -16.517  
O 4.623 -2.275 -20.270  
H 5.284 -1.614 -20.599  
H 5.098 -3.145 -20.305  
O 2.835 3.576 -25.600  
H 2.782 4.540 -25.776  
H 3.086 3.530 -24.662  
O 2.210 -0.282 -15.991  
H 1.996 0.374 -16.690  
H 1.505 -0.951 -16.071  
O 3.067 -1.313 -18.340  
H 3.634 -1.668 -19.083  
H 2.600 -0.505 -18.673  
C 12.645 -0.424 -20.515  
C 5.580 10.827 -20.553  
C -0.975 1.741 -24.262  
C -0.721 3.141 -20.693  
C 10.430 -1.667 -17.165  
C 7.555 3.958 -14.097  
C 7.256 -3.600 -13.189

60

TS(OXNA, OXrotNA)

C 11.990 -0.649 -21.890  
H 12.238 -1.654 -22.235  
H 12.432 0.057 -22.593  
C 10.482 -0.568 -21.817  
C 9.755 0.617 -21.644  
H 10.268 1.576 -21.649  
C 8.380 0.583 -21.422  
H 7.819 1.501 -21.294  
C 7.695 -0.644 -21.370  
O 6.363 -0.712 -21.059  
H 5.983 0.186 -21.298  
C 8.395 -1.827 -21.609  
H 7.856 -2.770 -21.601  
C 9.770 -1.769 -21.824  
H 10.352 -2.671 -21.959  
C 4.691 9.934 -19.644  
H 3.646 10.241 -19.757  
H 4.985 10.068 -18.605  
C 4.735 8.429 -19.921  
O 4.511 7.615 -19.055  
O 4.923 8.062 -21.204  
H 4.788 7.093 -21.225  
C 0.024 0.581 -24.489  
H 0.059 0.344 -25.548



|   |        |        |         |   |        |        |         |    |        |        |         |
|---|--------|--------|---------|---|--------|--------|---------|----|--------|--------|---------|
| H | -0.299 | -0.299 | -23.941 | H | 10.390 | -2.724 | -21.705 | H  | 2.234  | -3.612 | -16.051 |
| H | 1.023  | 0.877  | -24.164 | C | 4.696  | 9.931  | -19.644 | N  | 3.272  | -4.842 | -14.632 |
| C | 0.602  | 3.711  | -20.253 | H | 3.651  | 10.239 | -19.752 | H  | 2.636  | -5.650 | -14.566 |
| H | 0.661  | 3.651  | -19.164 | H | 4.995  | 10.069 | -18.605 | C  | 4.488  | -4.700 | -13.995 |
| H | 0.631  | 4.783  | -20.485 | C | 4.735  | 8.420  | -19.919 | H  | 4.841  | -5.443 | -13.294 |
| C | 1.825  | 3.084  | -20.888 | O | 4.525  | 7.613  | -19.038 | CU | 4.246  | -1.110 | -16.342 |
| C | 3.044  | 3.478  | -20.156 | O | 4.894  | 8.048  | -21.197 | O  | 4.421  | -2.534 | -20.039 |
| C | 2.055  | 2.294  | -21.957 | H | 4.663  | 7.095  | -21.244 | H  | 5.044  | -1.804 | -20.261 |
| H | 1.362  | 1.796  | -22.614 | C | 0.064  | 0.607  | -24.416 | H  | 4.978  | -3.346 | -20.200 |
| C | 4.217  | 2.723  | -20.320 | H | 0.298  | 0.480  | -25.472 | O  | 2.975  | 3.478  | -25.793 |
| H | 4.812  | 2.807  | -19.443 | H | -0.348 | -0.324 | -24.030 | H  | 2.871  | 4.451  | -25.851 |
| C | 3.390  | 2.097  | -22.509 | H | 0.967  | 0.851  | -23.845 | H  | 3.070  | 3.297  | -24.844 |
| C | 4.546  | 2.114  | -21.527 | C | 0.562  | 3.864  | -20.162 | O  | 2.303  | -0.608 | -15.648 |
| O | 2.930  | 4.391  | -19.318 | H | 0.471  | 3.947  | -19.072 | H  | 1.804  | -0.777 | -16.473 |
| O | 3.486  | 1.862  | -23.705 | H | 0.598  | 4.881  | -20.560 | H  | 1.947  | -1.257 | -15.017 |
| O | 5.607  | 1.545  | -21.877 | C | 1.861  | 3.180  | -20.495 | O  | 3.015  | -1.488 | -18.086 |
| C | -0.849 | 7.742  | -15.569 | C | 3.000  | 4.039  | -21.079 | H  | 3.499  | -2.113 | -18.701 |
| H | -0.657 | 8.150  | -14.567 | C | 2.116  | 1.890  | -20.192 | H  | 3.056  | -0.685 | -18.673 |
| H | -1.004 | 8.593  | -16.235 | H | 1.382  | 1.250  | -19.707 | C  | 12.642 | -0.423 | -20.516 |
| C | 0.331  | 6.963  | -16.026 | C | 4.168  | 3.389  | -21.561 | C  | 5.581  | 10.829 | -20.552 |
| C | 1.078  | 6.198  | -15.130 | H | 4.915  | 3.998  | -22.058 | C  | -0.975 | 1.742  | -24.262 |
| H | 0.739  | 6.096  | -14.101 | C | 3.436  | 1.321  | -20.429 | C  | -0.708 | 3.157  | -20.707 |
| C | 2.255  | 5.590  | -15.543 | C | 4.426  | 2.045  | -21.338 | C  | 10.436 | -1.667 | -17.162 |
| H | 2.870  | 4.995  | -14.874 | O | 2.878  | 5.278  | -21.073 | C  | 7.555  | 3.958  | -14.099 |
| C | 2.690  | 5.771  | -16.854 | O | 3.802  | 0.285  | -19.851 | C  | 7.264  | -3.606 | -13.182 |
| O | 3.879  | 5.243  | -17.204 | O | 5.440  | 1.406  | -21.735 |    |        |        |         |
| H | 3.808  | 5.048  | -18.172 | C | 9.473  | -1.117 | -18.242 |    |        |        |         |
| C | 1.916  | 6.484  | -17.780 | H | 9.784  | -1.512 | -19.209 |    |        |        |         |
| H | 2.255  | 6.581  | -18.802 | H | 9.573  | -0.031 | -18.309 |    |        |        |         |
| C | 0.742  | 7.072  | -17.356 | C | 8.059  | -1.467 | -17.955 |    |        |        |         |
| H | 0.141  | 7.651  | -18.055 | N | 7.497  | -2.700 | -18.247 |    |        |        |         |
| C | 12.641 | -0.424 | -20.516 | H | 7.937  | -3.436 | -18.800 |    |        |        |         |
| C | 5.581  | 10.831 | -20.548 | C | 6.245  | -2.731 | -17.757 |    |        |        |         |
| C | -0.979 | 1.738  | -24.269 | H | 5.562  | -3.553 | -17.869 |    |        |        |         |
| C | -0.731 | 3.134  | -20.726 | N | 5.974  | -1.578 | -17.158 |    |        |        |         |
| C | -2.146 | 6.930  | -15.540 | C | 7.091  | -0.776 | -17.282 |    |        |        |         |
|   |        |        |         | H | 7.126  | 0.224  | -16.883 |    |        |        |         |
|   |        |        |         | C | 6.021  | 3.742  | -14.053 |    |        |        |         |
|   |        |        |         | H | 5.526  | 4.704  | -14.226 |    |        |        |         |
|   |        |        |         | H | 5.751  | 3.423  | -13.043 |    |        |        |         |
|   |        |        |         | C | 5.521  | 2.712  | -15.020 |    |        |        |         |
|   |        |        |         | N | 5.018  | 2.996  | -16.277 |    |        |        |         |
|   |        |        |         | H | 4.903  | 3.909  | -16.711 |    |        |        |         |
|   |        |        |         | C | 4.588  | 1.851  | -16.848 |    |        |        |         |
|   |        |        |         | H | 4.157  | 1.790  | -17.835 |    |        |        |         |
|   |        |        |         | N | 4.786  | 0.833  | -16.022 |    |        |        |         |
|   |        |        |         | C | 5.364  | 1.355  | -14.881 |    |        |        |         |
|   |        |        |         | H | 5.628  | 0.727  | -14.043 |    |        |        |         |
|   |        |        |         | C | 6.310  | -2.791 | -14.050 |    |        |        |         |
|   |        |        |         | H | 6.842  | -2.479 | -14.953 |    |        |        |         |
|   |        |        |         | H | 6.048  | -1.877 | -13.501 |    |        |        |         |
|   |        |        |         | C | 5.030  | -3.507 | -14.419 |    |        |        |         |
|   |        |        |         | N | 4.126  | -2.932 | -15.307 |    |        |        |         |
|   |        |        |         | C | 3.094  | -3.763 | -15.415 |    |        |        |         |

93

OXrotNA

|   |        |        |         |
|---|--------|--------|---------|
| C | 11.968 | -0.653 | -21.876 |
| H | 12.234 | -1.647 | -22.239 |
| H | 12.368 | 0.074  | -22.582 |
| C | 10.462 | -0.609 | -21.754 |
| C | 9.709  | 0.567  | -21.637 |
| H | 10.202 | 1.534  | -21.713 |
| C | 8.339  | 0.517  | -21.385 |
| H | 7.755  | 1.427  | -21.300 |
| C | 7.683  | -0.720 | -21.251 |
| O | 6.365  | -0.805 | -20.936 |
| H | 5.894  | 0.071  | -21.167 |
| C | 8.415  | -1.901 | -21.410 |
| H | 7.899  | -2.853 | -21.336 |
| C | 9.785  | -1.827 | -21.647 |
